# Supplementary material for: Divergent Ca2+/calmodulin feedback regulation of CaV1 and CaV2 voltage-gated calcium channels evolved in the common ancestor of Placozoa and Bilateria
Source: PubMed Central journal article supplement — J Biol Chem. 2022 Feb 16;298(4):101741. doi: 10.1016/j.jbc.2022.101741 (PMC8980814; doi:10.1016/j.jbc.2022.101741), 2022-02-16
Supplement: mmc1.pdf [file mmc1.pdf]

**Divergent Ca<sup>2+</sup>/calmodulin feedback regulation of Cav1 and Cav2 voltage-gated calcium channels evolved in the common ancestor of Placozoa and Bilateria**

Julia Gauberg<sup>1</sup>, Wassim Elkhatib<sup>1</sup>, Carolyn L. Smith<sup>2</sup>, Anhadvir Singh<sup>1</sup>, and Adriano Senatore<sup>1,\*</sup>

<sup>1</sup>Department of Biology, University of Toronto Mississauga, 3359 Mississauga Road, Mississauga, ON L5L 1C6, Canada

<sup>2</sup>NINDS, National Institutes of Health, Bethesda Maryland, 20892 USA.

\*Corresponding author: Adriano Senatore

E-mail: adriano.senatore@utoronto.ca

Tel. (905) 569-4322

**Running title:** *Properties of a placozoan Cav1 voltage-gated Ca<sup>2+</sup> channel*

**Keywords:** *Trichoplax adhaerens*, Placozoa, voltage-gated Ca<sup>2+</sup> channels, Cav1 channels, L-type channels, Ca<sup>2+</sup>/calmodulin-dependent inactivation, dihydropyridines, patch clamp electrophysiology.

**Table S1: pages 2-5**

**Figures S1 to S6: pages 6-14**

**File S1: pages 15-49**

**References: page 50**

**Table S1. Reports of significant one-way and two-way ANOVA tests conducted throughout the study. The p-values of post-hoc tests associated with each ANOVA are indicated throughout the results.**

Fig 2D: EGFP fluorescence

One-way ANOVA

| Source of Variation | DF | SS     | MS      | F      | P      |
|---------------------|----|--------|---------|--------|--------|
| Between Groups      | 4  | 1.402  | 0.351   | 45.965 | <0.001 |
| Residual            | 10 | 0.0763 | 0.00763 |        |        |
| Total               | 14 | 1.479  |         |        |        |

Fig 4F:  $V_{1/2}$  and Slope factor (k)

$V_{1/2}$  conductance – one way ANOVA

| Source of Variation | DF | SS       | MS       | F      | P      |
|---------------------|----|----------|----------|--------|--------|
| Between Groups      | 2  | 2376.352 | 1188.176 | 36.569 | <0.001 |
| Residual            | 22 | 714.816  | 32.492   |        |        |
| Total               | 24 | 3091.168 |          |        |        |

$V_{1/2}$  steady state inactivation – one way ANOVA

| Source of Variation | DF | SS       | MS      | F      | P      |
|---------------------|----|----------|---------|--------|--------|
| Between Groups      | 2  | 1054.616 | 527.308 | 59.127 | <0.001 |
| Residual            | 17 | 151.610  | 8.918   |        |        |
| Total               | 19 | 1206.225 |         |        |        |

k conductance – one way ANOVA

| Source of Variation | DF | SS     | MS    | F     | P     |
|---------------------|----|--------|-------|-------|-------|
| Between Groups      | 2  | 13.789 | 6.894 | 6.883 | 0.005 |
| Residual            | 23 | 23.038 | 1.002 |       |       |
| Total               | 25 | 36.827 |       |       |       |

k steady state inactivation – one way ANOVA

| Source of Variation | DF | SS      | MS      | F      | P      |
|---------------------|----|---------|---------|--------|--------|
| Between Groups      | 2  | 218.406 | 109.203 | 44.847 | <0.001 |
| Residual            | 17 | 41.395  | 2.435   |        |        |
| Total               | 19 | 259.801 |         |        |        |

Fig 6:  $\tau$  activation

rCav1.2 – one-way repeated measures ANOVA

| Source of Variation | DF  | SS     | MS     | F      | P      |
|---------------------|-----|--------|--------|--------|--------|
| Between Subjects    | 10  | 2.547  | 0.255  |        |        |
| Between Treatments  | 12  | 50.486 | 4.207  | 90.368 | <0.001 |
| Residual            | 102 | 4.749  | 0.0466 |        |        |
| Total               | 124 | 57.607 | 0.465  |        |        |

TCav1 – one-way repeated measures ANOVA

| Source of Variation | DF  | SS      | MS     | F      | P      |
|---------------------|-----|---------|--------|--------|--------|
| Between Subjects    | 11  | 20.311  | 1.846  |        |        |
| Between Treatments  | 15  | 523.176 | 34.878 | 68.928 | <0.001 |
| Residual            | 150 | 75.902  | 0.506  |        |        |
| Total               | 176 | 632.227 | 3.592  |        |        |

TCav1 vs rCaV1.2 – two-way ANOVA

| Source of Variation | DF  | SS      | MS     | F       | P      |
|---------------------|-----|---------|--------|---------|--------|
| channel             | 1   | 52.252  | 52.252 | 205.015 | <0.001 |
| voltage             | 12  | 181.353 | 15.113 | 59.296  | <0.001 |
| channel x voltage   | 12  | 27.810  | 2.317  | 9.093   | <0.001 |
| Residual            | 248 | 63.208  | 0.255  |         |        |
| Total               | 273 | 343.786 | 1.259  |         |        |

Fig 6:  $\tau$  inactivation

rCaV1.2 – fast  $\tau$  – one-way repeated measures ANOVA

| Source of Variation | DF  | SS        | MS       | F      | P      |
|---------------------|-----|-----------|----------|--------|--------|
| Between Subjects    | 11  | 2954.280  | 268.571  |        |        |
| Between Treatments  | 9   | 44357.454 | 4928.606 | 40.720 | <0.001 |
| Residual            | 83  | 10046.015 | 121.036  |        |        |
| Total               | 103 | 58816.921 | 571.038  |        |        |

rCaV1.2 – slow  $\tau$  – one-way repeated measures ANOVA

| Source of Variation | DF | SS         | MS        | F      | P      |
|---------------------|----|------------|-----------|--------|--------|
| Between Subjects    | 11 | 23246.960  | 2113.360  |        |        |
| Between Treatments  | 9  | 194487.117 | 21609.680 | 18.835 | <0.001 |
| Residual            | 75 | 86050.459  | 1147.339  |        |        |
| Total               | 95 | 311492.844 | 3278.872  |        |        |

TCav1 – fast  $\tau$  – one-way repeated measures ANOVA

| Source of Variation | DF  | SS        | MS       | F      | P      |
|---------------------|-----|-----------|----------|--------|--------|
| Between Subjects    | 11  | 3340.943  | 303.722  |        |        |
| Between Treatments  | 12  | 32626.001 | 2718.833 | 33.372 | <0.001 |
| Residual            | 125 | 10183.700 | 81.470   |        |        |
| Total               | 148 | 46627.207 | 315.049  |        |        |

TCav1 – slow  $\tau$  – one-way repeated measures ANOVA

| Source of Variation | DF  | SS         | MS        | F      | P      |
|---------------------|-----|------------|-----------|--------|--------|
| Between Subjects    | 11  | 30307.805  | 2755.255  |        |        |
| Between Treatments  | 12  | 238042.646 | 19836.887 | 10.991 | <0.001 |
| Residual            | 98  | 176875.725 | 1804.854  |        |        |
| Total               | 121 | 455990.051 | 3768.513  |        |        |

TCav1 vs rCaV1.2 – fast  $\tau$  – two-way ANOVA

| Source of Variation | DF  | SS        | MS        | F       | P      |
|---------------------|-----|-----------|-----------|---------|--------|
| channel             | 1   | 15353.326 | 15353.326 | 159.662 | <0.001 |
| voltage             | 9   | 20541.683 | 2282.409  | 23.735  | <0.001 |
| channel x voltage   | 9   | 31366.891 | 3485.210  | 36.243  | <0.001 |
| Residual            | 201 | 19328.410 | 96.161    |         |        |
| Total               | 220 | 81762.689 | 371.649   |         |        |

TCav1 vs rCaV1.2 – slow  $\tau$  – two-way ANOVA

| Source of Variation | DF  | SS         | MS        | F      | P      |
|---------------------|-----|------------|-----------|--------|--------|
| channel             | 1   | 18038.487  | 18038.487 | 13.347 | <0.001 |
| voltage             | 9   | 110628.242 | 12292.027 | 9.095  | <0.001 |
| channel x voltage   | 9   | 108441.097 | 12049.011 | 8.915  | <0.001 |
| Residual            | 171 | 231114.230 | 1351.545  |        |        |
| Total               | 190 | 453886.248 | 2388.875  |        |        |

**Fig 6:  $\tau$  deactivation**

rCav1.2 – one-way repeated measures ANOVA

| Source of Variation | DF | SS     | MS      | F      | P      |
|---------------------|----|--------|---------|--------|--------|
| Between Subjects    | 5  | 0.0369 | 0.00739 |        |        |
| Between Treatments  | 9  | 1.115  | 0.124   | 32.466 | <0.001 |
| Residual            | 43 | 0.164  | 0.00381 |        |        |
| Total               | 57 | 1.319  | 0.0231  |        |        |

TCav1 – fast  $\tau$  – one-way repeated measures ANOVA

| Source of Variation | DF  | SS     | MS    | F     | P      |
|---------------------|-----|--------|-------|-------|--------|
| Between Subjects    | 15  | 5.581  | 0.372 |       |        |
| Between Treatments  | 9   | 21.243 | 2.360 | 8.727 | <0.001 |
| Residual            | 104 | 28.128 | 0.270 |       |        |
| Total               | 128 | 55.279 | 0.432 |       |        |

TCav1 – slow  $\tau$  – one-way repeated measures ANOVA

| Source of Variation | DF | SS        | MS       | F     | P      |
|---------------------|----|-----------|----------|-------|--------|
| Between Subjects    | 11 | 5172.971  | 470.270  |       |        |
| Between Treatments  | 9  | 31281.409 | 3475.712 | 9.985 | <0.001 |
| Residual            | 70 | 24367.121 | 348.102  |       |        |
| Total               | 90 | 61080.477 | 678.672  |       |        |

TCav1 (fast  $\tau$ ) vs rCav1.2 – two-way ANOVA

| Source of Variation | DF  | SS     | MS     | F       | P      |
|---------------------|-----|--------|--------|---------|--------|
| Channel             | 1   | 31.860 | 31.860 | 156.901 | <0.001 |
| Voltage             | 9   | 11.494 | 1.277  | 6.289   | <0.001 |
| Channel x Voltage   | 9   | 3.660  | 0.407  | 2.003   | 0.042  |
| Residual            | 167 | 33.911 | 0.203  |         |        |
| Total               | 186 | 86.996 | 0.468  |         |        |

**Fig 7: TCav1 vs TCav2 pC/pA**

| Source of Variation | DF | SS        | MS        | F      | P      |
|---------------------|----|-----------|-----------|--------|--------|
| channel             | 1  | 176.247   | 176.247   | 0.493  | 0.490  |
| time                | 2  | 21446.271 | 10723.136 | 29.996 | <0.001 |
| channel x time      | 2  | 686.812   | 343.406   | 0.961  | 0.397  |
| Residual            | 23 | 8222.086  | 357.482   |        |        |
| Total               | 28 | 31289.969 | 1117.499  |        |        |

**Fig 8G: R(+) BayK**

R(+)-BayK 8644 – two-way ANOVA

| Source of Variation     | DF | SS    | MS      | F       | P      |
|-------------------------|----|-------|---------|---------|--------|
| channel                 | 1  | 3.599 | 3.599   | 557.338 | <0.001 |
| concentration           | 4  | 4.132 | 1.033   | 159.970 | <0.001 |
| channel x concentration | 4  | 0.758 | 0.189   | 29.331  | <0.001 |
| Residual                | 51 | 0.329 | 0.00646 |         |        |
| Total                   | 60 | 8.759 | 0.146   |         |        |

### Fig 9D: r250- EGTA vs BAPTA

TCav1 – one-way ANOVA

| <b>Source of Variation</b> | <b>DF</b> | <b>SS</b> | <b>MS</b> | <b>F</b> | <b>P</b> |
|----------------------------|-----------|-----------|-----------|----------|----------|
| Between Groups             | 2         | 0.817     | 0.409     | 101.449  | <0.001   |
| Residual                   | 19        | 0.0765    | 0.00403   |          |          |
| Total                      | 21        | 0.894     |           |          |          |

TCav2 – one-way ANOVA

| <b>Source of Variation</b> | <b>DF</b> | <b>SS</b> | <b>MS</b> | <b>F</b> | <b>P</b> |
|----------------------------|-----------|-----------|-----------|----------|----------|
| Between Groups             | 2         | 0.214     | 0.107     | 35.932   | <0.001   |
| Residual                   | 20        | 0.0595    | 0.00298   |          |          |
| Total                      | 22        | 0.273     |           |          |          |

### Fig 10: CaM WT vs CaM<sub>1234</sub>

rCav1.2 – two-way ANOVA

| <b>Source of Variation</b> | <b>DF</b> | <b>SS</b> | <b>MS</b> | <b>F</b> | <b>P</b> |
|----------------------------|-----------|-----------|-----------|----------|----------|
| CaM                        | 1         | 2.501     | 2.501     | 360.440  | <0.001   |
| voltage                    | 17        | 6.765     | 0.398     | 57.356   | <0.001   |
| CaM x voltage              | 17        | 3.148     | 0.185     | 26.684   | <0.001   |
| Residual                   | 235       | 1.631     | 0.00694   |          |          |
| Total                      | 270       | 15.393    | 0.0570    |          |          |

TCav1 – two-way ANOVA

| <b>Source of Variation</b> | <b>DF</b> | <b>SS</b> | <b>MS</b> | <b>F</b> | <b>P</b> |
|----------------------------|-----------|-----------|-----------|----------|----------|
| CaM                        | 1         | 5.264     | 5.264     | 390.647  | <0.001   |
| voltage                    | 17        | 12.335    | 0.726     | 53.845   | <0.001   |
| CaM x voltage              | 17        | 1.594     | 0.0938    | 6.960    | <0.001   |
| Residual                   | 355       | 4.784     | 0.0135    |          |          |
| Total                      | 390       | 27.965    | 0.0717    |          |          |

TCav2 – two-way ANOVA

| <b>Source of Variation</b> | <b>DF</b> | <b>SS</b> | <b>MS</b> | <b>F</b> | <b>P</b> |
|----------------------------|-----------|-----------|-----------|----------|----------|
| CaM                        | 1         | 2.034     | 2.034     | 454.139  | <0.001   |
| voltage                    | 17        | 10.064    | 0.592     | 132.167  | <0.001   |
| CaM x voltage              | 17        | 1.451     | 0.0854    | 19.059   | <0.001   |
| Residual                   | 222       | 0.994     | 0.00448   |          |          |
| Total                      | 257       | 16.126    | 0.0627    |          |          |



**Figure S1.** Protein alignment of full-length Cav channel protein sequences from *Trichoplax adhaerens* (TCav1 to TCav3), rat (rCav1.2) and the choanoflagellate *Salpingoeca rosetta* (SrCav1/2). The alpha interaction domain (AID) is highlighted in *green* (with *black* text), positively charged arginine/lysine residues in segment 4 (S4) voltage-sensing regions of each domain are highlighted in *red*, the negatively charged glutamate/aspartate P-loop selectivity filter residues are highlighted in *purple*, and the calmodulin binding sites (EF-hand, pre-IQ, and IQ domains) are highlighted in *blue*. Amino acids that form the N-terminal spatial Ca<sup>2+</sup> transforming element (NSCaTE) motif, the NSCaTE associated transduction element (NATE) motif, and the TCav1 II-III linker region used as an antigen for antibody synthesis are highlighted in *yellow*. Residues associated with point mutations that alter voltage-sensitivity of mammalian Cav1 channels are highlighted *orange* (106), and negatively charged residues suggested to contribute to Ca<sup>2+</sup> selectivity are highlighted in *pink* (32). The optional exon 33 encoding a portion of the DIV S3-S4 loop in Cav1.2 channels is in *green* (with *white* text) (108).







**Figure S2.** Protein alignment of Cav $\beta$  protein sequences from *Trichoplax adhaerens* (Ta $\beta$ ), the rat *Rattus norvegicus* (Rn $\beta$ 1-4), the snail *Lymnaea stagnalis* (Ls $\beta$ ), and the choanoflagellate *Salpingoeca rosetta* (Sr $\beta$ ). The SH3 domain is highlighted in *orange*, the HOOK region in *grey*, and the Guanylate Kinase (GK) domain in *green*. Amino acids identified in the rat  $\beta$ 3 protein sequence that interact with the Cav1.2 channel AID region through x-ray crystallography are shown in red (38). Accession numbers for the included sequences are provided in File S1.

\*Signal peptide

Taa\_0A .....MMSSQRKFLTTVAFLAFIGIFMS...HVI RGGQFNLE-NILWADQIGNEINRIGYEILDNK IENIYQ--KDDL
Taa\_0B .....MQLTATLILFIFST...LG-QGQWLTND-RVEIWAALKSDELTYLSESLTTVENIQVAYE--AKNV
Rna\_01 .....MAAGCLLALTLFQSWLIG...PS-SEEFPSPTIKSWDMKQMEDLTYLAKTATQWTLADIYEKVDNLF
Rna\_02 .....MAVPARTCGASWPGPVRTARPPGRRPCPPRGPASOPARPLLLPLLLPLLA...PGASAVYFPPQHTMQHWARRLEIDGMVRIFGVQQLRLEIYKDKNRNLF
Rna\_03 .....MAGPGLSCASRGASALLATALLAALGD...VVRSEQIPLS-VVKLWASAFEGEIKSIAAKYSGSQLLQKKYKKEKDY
Rna\_04 .....MPRDLGSGKLVHRSRSTVLLPCPPSPGNTMARSPRTLSSSHSWGHRGQQTAAWTLFRKMPVILWLLLDLSTPLTARSQATIPLE-TVKLWAEITFGDRDLYSTRYSGSLLQKKYKDAEPSL
Taa\_0A .....LMTYSTKFKTL-INSSLSVIOPTINNVYSGSRVILA
Taa\_0B .....LTPYNDRFRS-VNANI SAIOPTINNVYSGSRVILA
Rna\_01 .....IKPFI EDANFRGQ...ISYQHAAYQIPTDIYEGSTVILN
Rna\_02 .....DPERNESGSGQR...IKPFI EDANFRGQ...ISYQHAAYQIPTDIYEGSTVILN
Rna\_03 .....DPERNESGSGQR...IKPFI EDANFRGQ...ISYQHAAYQIPTDIYEGSTVILN
Rna\_04 .....DPERNESGSGQR...IKPFI EDANFRGQ...ISYQHAAYQIPTDIYEGSTVILN
Taa\_0A .....PKNVILLDVSGSMHGMPLDAKWGTSNLLDNLQNDFFETLTFNESITPV
Taa\_0B .....PKNVILLDVSGSMHGMPLDAKWGTSNLLDNLQNDFFETLTFNESITPV
Rna\_01 .....PKNVILLDVSGSMHGMPLDAKWGTSNLLDNLQNDFFETLTFNESITPV
Rna\_02 .....PKNVILLDVSGSMHGMPLDAKWGTSNLLDNLQNDFFETLTFNESITPV
Rna\_03 .....PKNVILLDVSGSMHGMPLDAKWGTSNLLDNLQNDFFETLTFNESITPV
Rna\_04 .....PKNVILLDVSGSMHGMPLDAKWGTSNLLDNLQNDFFETLTFNESITPV

Taa\_0A .....DGAAYTEKILAEARN-SEKIRITIFVVGQVYDTVTEKLTCEYNGKFLGK
Taa\_0B .....DGAAYTEKILAEARN-SEKIRITIFVVGQVYDTVTEKLTCEYNGKFLGK
Rna\_01 .....DGAAYTEKILAEARN-SEKIRITIFVVGQVYDTVTEKLTCEYNGKFLGK
Rna\_02 .....DGAAYTEKILAEARN-SEKIRITIFVVGQVYDTVTEKLTCEYNGKFLGK
Rna\_03 .....DGAAYTEKILAEARN-SEKIRITIFVVGQVYDTVTEKLTCEYNGKFLGK
Rna\_04 .....DGAAYTEKILAEARN-SEKIRITIFVVGQVYDTVTEKLTCEYNGKFLGK
Taa\_0A .....EOLLGVMAATDVPIEMFOQCVPPOHLLLNQYAFVINDNGLVLE
Taa\_0B .....EOLLGVMAATDVPIEMFOQCVPPOHLLLNQYAFVINDNGLVLE
Rna\_01 .....EOLLGVMAATDVPIEMFOQCVPPOHLLLNQYAFVINDNGLVLE
Rna\_02 .....EOLLGVMAATDVPIEMFOQCVPPOHLLLNQYAFVINDNGLVLE
Rna\_03 .....EOLLGVMAATDVPIEMFOQCVPPOHLLLNQYAFVINDNGLVLE
Rna\_04 .....EOLLGVMAATDVPIEMFOQCVPPOHLLLNQYAFVINDNGLVLE

Taa\_0A .....KLMGGLVTVAMPAPFRPMLTASLNP...EOLLGVMAATDVPIEMFOQCVPPOHLLLNQYAFVINDNGLVLE
Taa\_0B .....KLMGGLVTVAMPAPFRPMLTASLNP...EOLLGVMAATDVPIEMFOQCVPPOHLLLNQYAFVINDNGLVLE
Rna\_01 .....KLMGGLVTVAMPAPFRPMLTASLNP...EOLLGVMAATDVPIEMFOQCVPPOHLLLNQYAFVINDNGLVLE
Rna\_02 .....KLMGGLVTVAMPAPFRPMLTASLNP...EOLLGVMAATDVPIEMFOQCVPPOHLLLNQYAFVINDNGLVLE
Rna\_03 .....KLMGGLVTVAMPAPFRPMLTASLNP...EOLLGVMAATDVPIEMFOQCVPPOHLLLNQYAFVINDNGLVLE
Rna\_04 .....KLMGGLVTVAMPAPFRPMLTASLNP...EOLLGVMAATDVPIEMFOQCVPPOHLLLNQYAFVINDNGLVLE
Taa\_0A .....KLMGGLVTVAMPAPFRPMLTASLNP...EOLLGVMAATDVPIEMFOQCVPPOHLLLNQYAFVINDNGLVLE
Taa\_0B .....KLMGGLVTVAMPAPFRPMLTASLNP...EOLLGVMAATDVPIEMFOQCVPPOHLLLNQYAFVINDNGLVLE
Rna\_01 .....KLMGGLVTVAMPAPFRPMLTASLNP...EOLLGVMAATDVPIEMFOQCVPPOHLLLNQYAFVINDNGLVLE
Rna\_02 .....KLMGGLVTVAMPAPFRPMLTASLNP...EOLLGVMAATDVPIEMFOQCVPPOHLLLNQYAFVINDNGLVLE
Rna\_03 .....KLMGGLVTVAMPAPFRPMLTASLNP...EOLLGVMAATDVPIEMFOQCVPPOHLLLNQYAFVINDNGLVLE
Rna\_04 .....KLMGGLVTVAMPAPFRPMLTASLNP...EOLLGVMAATDVPIEMFOQCVPPOHLLLNQYAFVINDNGLVLE

Taa\_0A .....KLMGGLVTVAMPAPFRPMLTASLNP...EOLLGVMAATDVPIEMFOQCVPPOHLLLNQYAFVINDNGLVLE
Taa\_0B .....KLMGGLVTVAMPAPFRPMLTASLNP...EOLLGVMAATDVPIEMFOQCVPPOHLLLNQYAFVINDNGLVLE
Rna\_01 .....KLMGGLVTVAMPAPFRPMLTASLNP...EOLLGVMAATDVPIEMFOQCVPPOHLLLNQYAFVINDNGLVLE
Rna\_02 .....KLMGGLVTVAMPAPFRPMLTASLNP...EOLLGVMAATDVPIEMFOQCVPPOHLLLNQYAFVINDNGLVLE
Rna\_03 .....KLMGGLVTVAMPAPFRPMLTASLNP...EOLLGVMAATDVPIEMFOQCVPPOHLLLNQYAFVINDNGLVLE
Rna\_04 .....KLMGGLVTVAMPAPFRPMLTASLNP...EOLLGVMAATDVPIEMFOQCVPPOHLLLNQYAFVINDNGLVLE
Taa\_0A .....KLMGGLVTVAMPAPFRPMLTASLNP...EOLLGVMAATDVPIEMFOQCVPPOHLLLNQYAFVINDNGLVLE
Taa\_0B .....KLMGGLVTVAMPAPFRPMLTASLNP...EOLLGVMAATDVPIEMFOQCVPPOHLLLNQYAFVINDNGLVLE
Rna\_01 .....KLMGGLVTVAMPAPFRPMLTASLNP...EOLLGVMAATDVPIEMFOQCVPPOHLLLNQYAFVINDNGLVLE
Rna\_02 .....KLMGGLVTVAMPAPFRPMLTASLNP...EOLLGVMAATDVPIEMFOQCVPPOHLLLNQYAFVINDNGLVLE
Rna\_03 .....KLMGGLVTVAMPAPFRPMLTASLNP...EOLLGVMAATDVPIEMFOQCVPPOHLLLNQYAFVINDNGLVLE
Rna\_04 .....KLMGGLVTVAMPAPFRPMLTASLNP...EOLLGVMAATDVPIEMFOQCVPPOHLLLNQYAFVINDNGLVLE

**Figure S3.** Protein alignment of Cav $\alpha_2\delta$  protein sequences from *Trichoplax adhaerens* (Ta $\alpha_2\delta$ A and Ta $\alpha_2\delta$ B), and *Rattus norvegicus* (Rn $\alpha_2\delta$ 1-4). Protein sequences bearing domains/sites predicted with InterProScan are highlighted as follows: signal peptides in *yellow*, von Willebrand factor type A-N (vWA-N) domains are in *green*, vWA-A domains are in *orange*, PAS/Cache domains are in *purple*, and C-terminal transmembrane helices are in *cyan*. Metal Ion-Dependent Adhesion Site (MIDAS) residues are highlighted in *red*, and C-terminal cysteine residues for extracellular glycosphosphatidylinositol (GPI) anchoring are highlighted in *grey*. Accession numbers for the included sequences are provided in File S1.

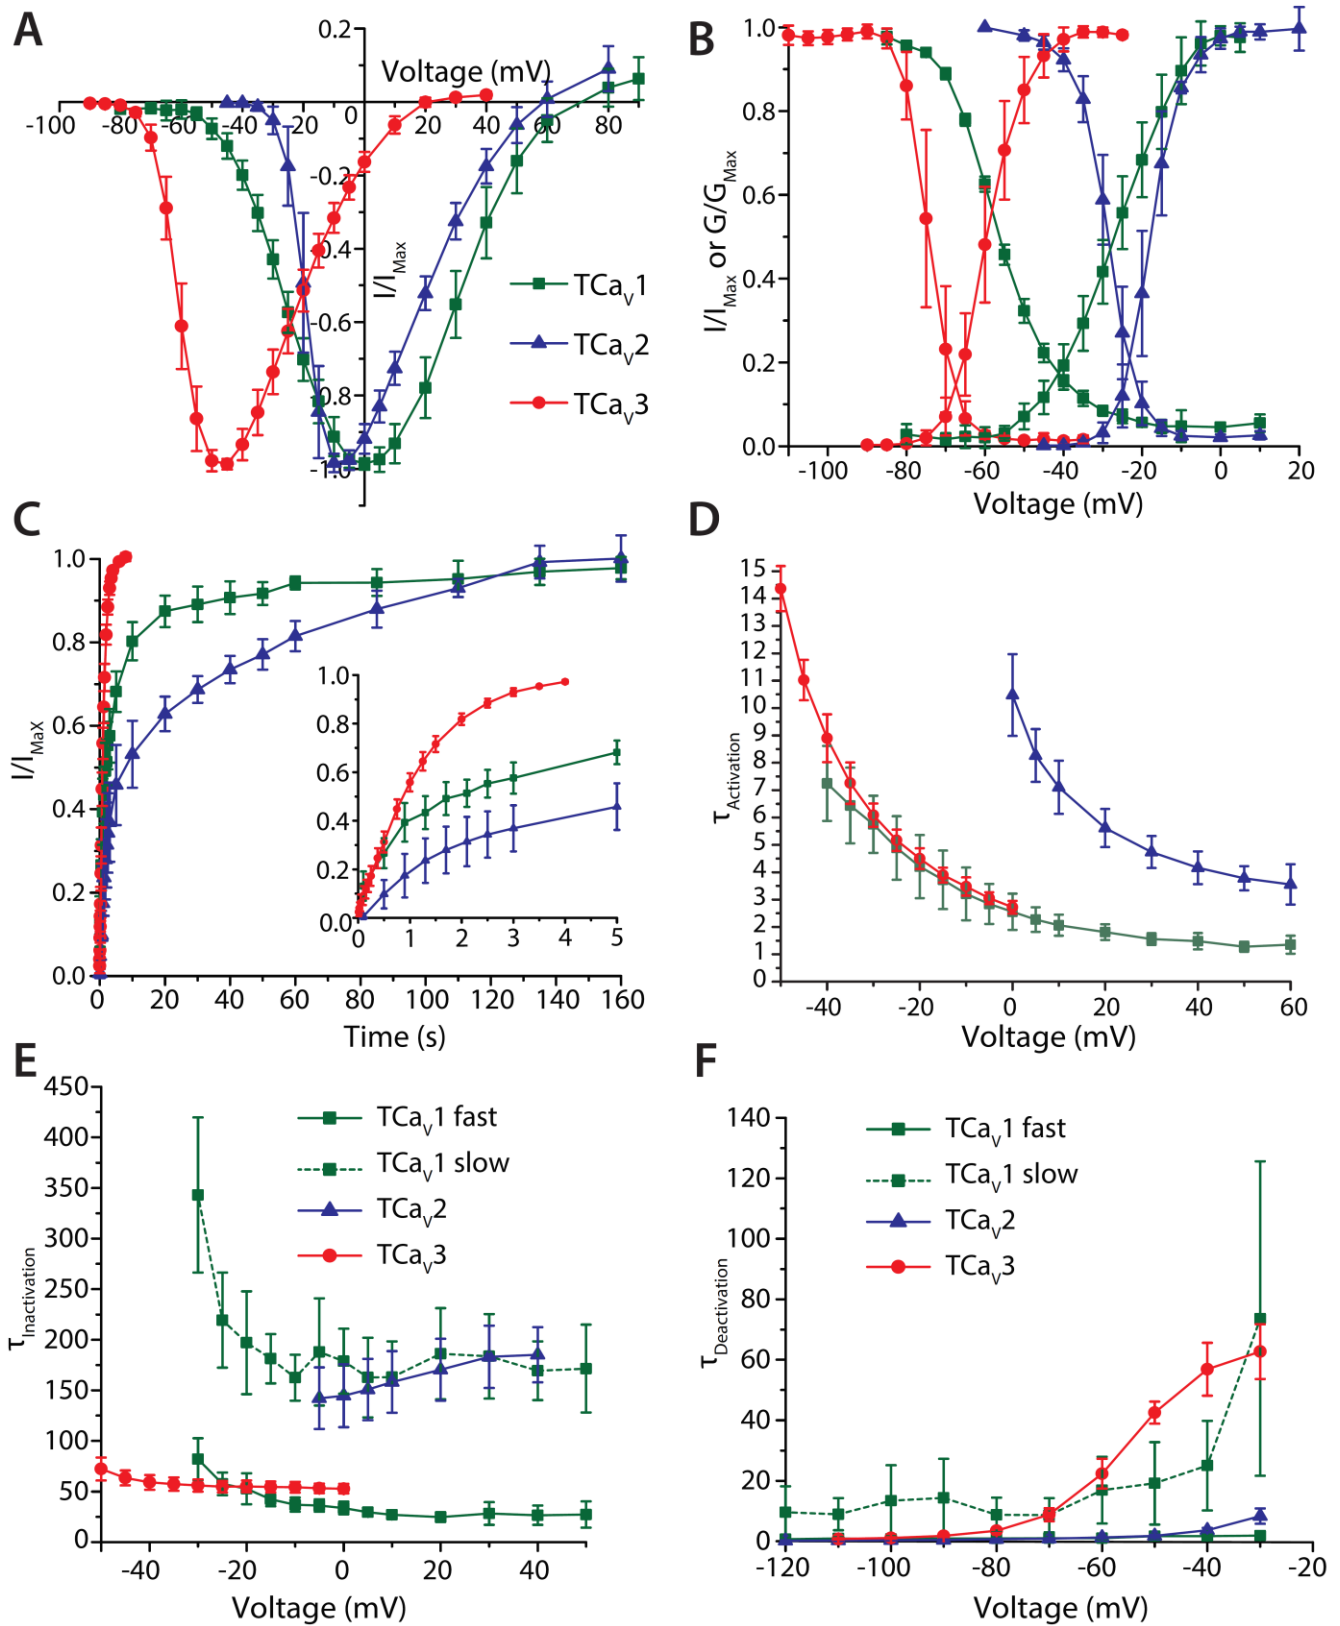

**Figure S4. Comparison of voltage and kinetic properties of the *Trichoplax* Ca<sub>V</sub> channel set.** *A*, Current-voltage relationships  $\pm$  S.D. (error bars) for TCa<sub>V</sub>3 (red), TCa<sub>V</sub>1 (green), and TCa<sub>V</sub>2 (blue) reveal conserved bimodal classification as low voltage activated (TCa<sub>V</sub>3) and high voltage activated (TCa<sub>V</sub>1 and TCa<sub>V</sub>2), with

respective maximal inward currents occurring at -45, -10, and 0 mV. **B**, Plots of average inactivation and conductance  $\pm$  S.D. reveal that TCa<sub>v</sub>1 voltage properties are intermediate relative to TCa<sub>v</sub>2 and TCa<sub>v</sub>3. **C**, Plots of average recovery from inactivation  $\pm$  S.D. *Inset*: current amplitude recovery data for the first 5 s, with inflections in the curves for TCa<sub>v</sub>1 and TCa<sub>v</sub>2 indicative of two-component recovery from inactivation for both channels, compared to a single component for TCa<sub>v</sub>3. **D**, Plot of average  $\tau_{\text{Activation}}$  values  $\pm$  S.D. over depolarizing voltages.  $\tau_{\text{Activation}}$  values were obtained by monoexponential curve fitting over the activation phase of macroscopic Ca<sup>2+</sup> currents. Notable is that TCa<sub>v</sub>1 and TCa<sub>v</sub>3 activation kinetics are overlapping at common voltages, and both are faster than those of TCa<sub>v</sub>2. **E**, Plot of  $\tau_{\text{Inactivation}}$  values  $\pm$  S.D. obtained by curve fitting over the inactivation phase of macroscopic Ca<sup>2+</sup> currents elicited by different depolarizing voltages. TCa<sub>v</sub>1 fitting produced two components for inactivation, with a fast component comparable to that of TCa<sub>v</sub>3, and a slow component comparable to TCa<sub>v</sub>2. **F**, Plot of average  $\tau_{\text{Deactivation}}$   $\pm$  S.D. obtained by curve fitting over tail currents elicited by hyperpolarizing voltage steps. TCa<sub>v</sub>1 fitting produced two components for deactivation, with a fast component similar to the single component of TCa<sub>v</sub>2 deactivation, and a slow component that resembled TCa<sub>v</sub>3 deactivation in its deceleration at more depolarized voltages.

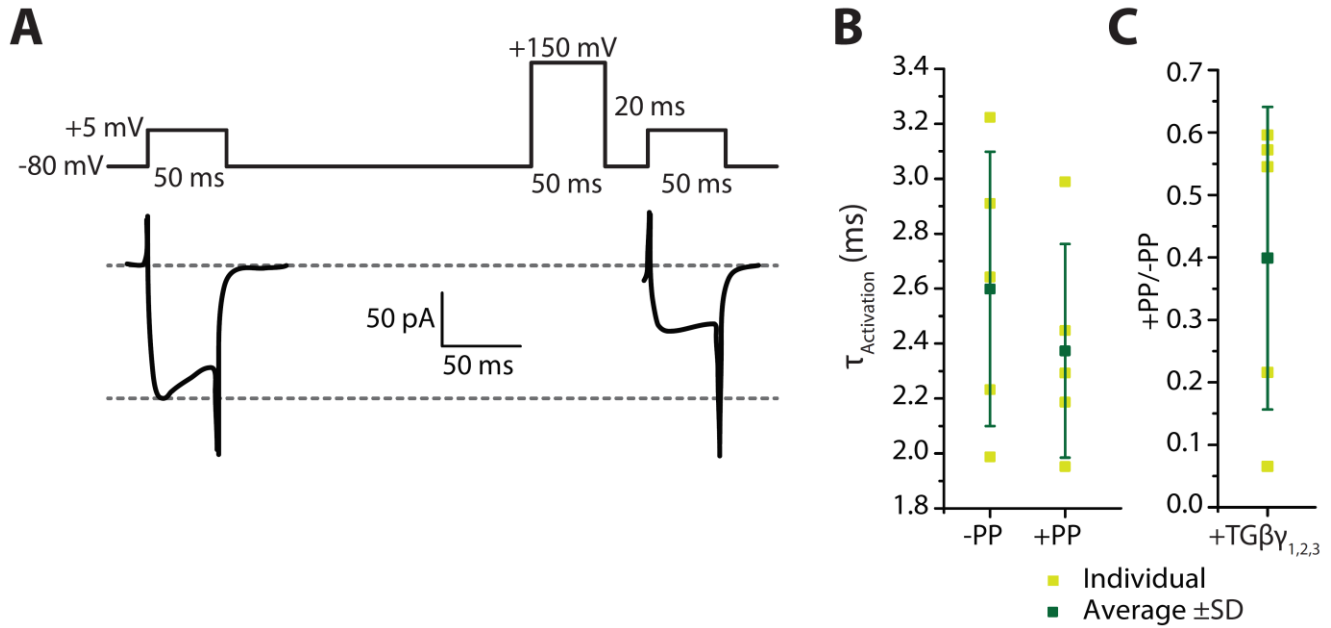

**Figure S5. Absence of voltage-dependent G $\beta\gamma$  inhibition for the TCa $v$ 1 channel *in vitro*.** *A*, illustration of the voltage-clamp protocol used to assess G-protein inhibition of TCa $v$ 1 channels *in vitro* (top), with a sample current trace elicited by voltage steps to +5 mV before and after a strong depolarizing pre-pulse to +150 mV shown below. *B*, Average  $\tau_{\text{Activation}}$  values  $\pm$  S.D. (error bars) before and after a +150 mV pre-pulse (PP) reveal no difference in activation kinetics.  $\tau_{\text{Activation}}$  was calculated by monoexponential curve fitting over the activation phase of TCa $v$ 1 macroscopic currents. *C*, Average facilitation of peak macroscopic current amplitude after the pre-pulse  $\pm$  S.D in cells co-transfected with *Trichoplax* G $\beta_1\gamma_{1-3}$  heterodimers. Current amplitude after the pre-pulse was normalized to the current amplitude before the pre-pulse. Altogether, TCa $v$ 1 currents did not exhibit voltage-dependent inhibition by co-expressed *Trichoplax* G $\beta_1\gamma_{1-3}$  heterodimers.

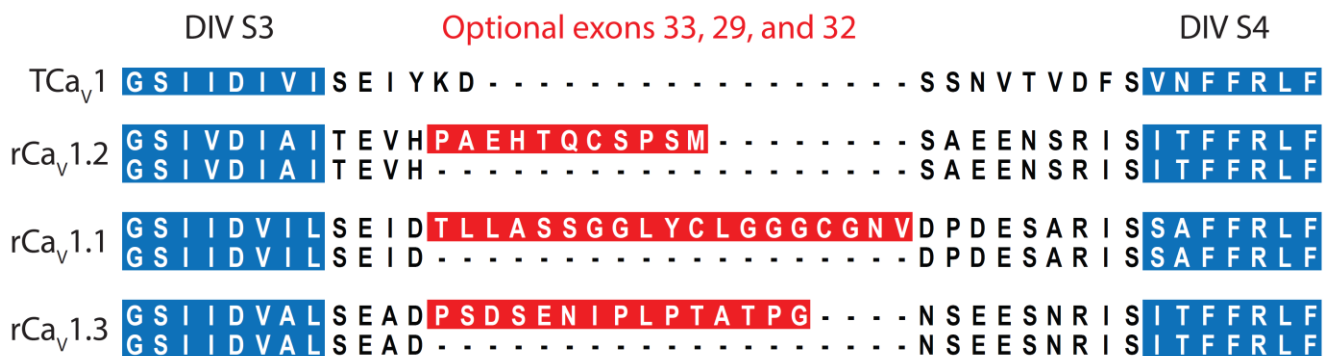

**Figure S6.** Protein alignment of the DIV S3-S3 loop region of TCa $v$ 1 and *Rattus norvegicus* Ca $v$ 1 channels, depicting the optional exons 29 (Ca $v$ 1.1) (109), 33 (Ca $v$ 1.2) (108), and 32 (Ca $v$ 1.3) (110).

**File S1.** Protein sequences and accession numbers of voltage-gated calcium channel protein sequences that were used in this study.

>NP\_000060.2|Homo\_sapiens\_CaV1.1

MEPSSPQDEGLRKKQPKKPVPEILPRPPRALFCLTLENPLRKACISIVEWKPFETIILLTIFANCVALAVYLPMP  
EDDNNSLNLGLEKLEYFFLIVFSIEAAMKIIAYGFLFHQDAYLRSGWNVLDFTIVFLGVFTVILEQVNVIIQSHTA  
PMSSKGAGLDVKALRAFRVLRPLRLVSGVPSLQVVLNSIFKAMPLPLFHIALLVLFMVIIYAIIGLELFGKGMHKT  
CYFIGTDIVATVENEPEPCARTGSGRRCTINGSECRGGWPGPNHGITHFDNFGFSMLTVYQCITMEGWTDVLYW  
VND AIGNEWPWIYFVTLILLGSFFILNLVGLVLSGEFTKEREKAKSRGTFQKLRKQQLDEDLRGYMSWITQGEV  
MDVEDFREGKLSLDEGGSDTESLYEIIAGLNKIIQFIRHWRQWNRIFRWKCHDIVKSKVFYWLVLIVALNTLSIA  
SEHHNQPLWLTRLQDIANRVLLSLFTTEMLMKMYGLGLRQYFMSIFNRFDCFVVCSGILEILLVESGAMTPLGIS  
VLR CIRLLRIFKITKYWTSLSNLVASLLNSIRSIASLLLLLFLFIVIFALLGMQLFGGRYDFEDTEVRRSNFDFN  
PQALISVFQVLTGEDWTSMMYNGIMAYGGPSYPGMLVCIYFIILFVCGNYILLNVFLAIAVDNLAEAESLTSAQK  
AKAEKRRRMSKGLPDKSEEEKSTMAKKLEQKPKGEGIPTAKLKIDEFESNVNEVKDPYPSADFPGDDEEDED  
EIPLSRPRPLAELQLKEKAVPIPEASSFFIFSPNTKIRVLRCHIRVNATWFTNFILLFILLSSAALAAEDPIRAD  
SMRNQILKHF DIGFTSVFTVEIVLKMTTYGAF LHKGSFCRNYFNMLDLLVAVSLISMGLESSAISVVKILRVLR  
VLRPLRAINRAKGLKHVVQCMFVAISTIGNIVLVTLLQFMFACIGVQLFKGKFFRCTDLSKMTTEEECRGYVVY  
KDGDPMQIELRHREWHSDHFHFNVL SAMMSLFTVSTFEGWQQLLYKAIDSNAEDVGPIYNNRVEMAIFFIYII  
LIAFFMMNIFVGFVIVTFQEQGETEYKNC ELDKNQRQCVQYALKARPLRCYIPKNPYQYQVWYIVTSSYFEYLMF  
ALIMLNTICLGMQHYNQSEQMNHISDILNVAFTIIFTLEMIKLMAFKARGYFGDPWNVDFDLIVIGSII DVILS  
EIDTFLASSGGLYCLGGGCGNVDPDESARISSAFFRLFRVMRLIKLLSRAEGVRTLLWTFIKSFQALPYVALLIV  
MLFFIYAVIGMQMFGKIALVDGTQINRNNNFQTFPQAVLLLFRCATGEAWQEILLACSYGKLCDPESDYAPGEEY  
TCGTNFAYYYYFISFYMLCAFLVINL FVAVIMDNFDYLTRDWSILGPHHLDEFKAIWAEYDPEAKGRIKHLDVVTL  
LRRIQPPLGFGKFCPHRVACKRLVGMNPLNSDGTVTFNATL FALVRTALKIKTEGNFEQANEELRAIIKKIWKR  
TSMKLLDQVIPIPIGDDEVTVGKFYATFLIQEHFRKFMKRQEEYGYRPPKDIVQIQAGLRTIEEEAAPEICRTVS  
GD LAEEEELE RAMVEAAMEEGIFRRTGGLFGQVDNFLERTNSLPPV MANQRPLQFAEIEEMEMESPVFLED FPD  
PRTNPLARANTNNANANVAYGNSNHSNSHVFSVHYEREFPEETETPATRGRALGQPCRVLGPHSKPCVEMLKGL  
LTQRAMPRGQAPPAPCQCPRVESMPEDRKSSTPGSLHEETPHSRSTRENTSRCSAPATALLIQKALVRGGLGTL  
AADANFIMATGQALADACQMEPEEVEIMATELLKGREAPEGMASSLGCLNLGSSSLGSLDQHQGSQETLIPRL

>NP\_955630.3|Homo\_sapiens\_CaV1.2

MVNENTRMYIPEENHQGSNYGSPRPAHANMNANAAAGLAPEHIPTPGAALSWQAAIDAARQAKLMGSAGNATIST  
VSSTQRKRQYQYKPKKQGSTTATRPPRALCLTLKNPIRRACISIVEWKPFETIILLTIFANCVALAIYIPFPED  
DSNATNSNLERVEYLFLIIFTVEAFLKVIAYGLLFHPNAYLRNGWNLDFIIVVGLFSAILEQATKADGANALG  
GKGAGFDVKALRAFRVLRPLRLVSGVPSLQVVLNSIIKAMVPLLHIALLVLFVIIYAIIGLELFGKGMHKT  
QEG IADVPAEDDPSCALETGHGRQCQNGTVCKPGWDGPKHGITNFDNFAFAMLTVFQCI TMEGWTDVLYWVND  
VGRDWPWIYFVTLIIIGSFFVLNLVGLVLSGEFSKEREKAKARGDFQKLRKQQLLEEDLKG YLDWITQAEIDPE  
NEDEGMDEEKPRNMSMPTSETESVNTEN VAGGDIEGENCGARLAHRISKSKFSRYWRRWNRFRRKCRAAVKS  
NVFYWLVI FLVFLNLTIIASEHYNQPNWLTEVQDTANKALLALFTAEMLLKMYSLGLQAYFVSLFNRFD  
CFVVCGGILETILVETKIMSPLGISVLRVLRLLRIFKITRYWNSLSNLVASLLNSVRSIASLLLLLFLFIIIF  
SLLGMQLFGGKFNDEMQTRRSTFDNFPQSLLTVFQILTGEDWNSVMYDGI MAYGGPSFPGLVCIYFIIL  
FICGNYILLNVFLAIAVDNLADAESLTSAQKEEEEEKERKKLARTASPEKKQELVEKPAVGESKEEKI  
ELKSITADGESPPATKINMDDLQPNENEDKSPYPNPETTGEDEEPEMPVGRPRPLSELHLKEKAVPMPEAS  
AFFIFSSNNRFR LQCHRIVNDTIFTNLILFFILLSSISLAAEDPVQHTSFRNHILFYFDIVFTTIFTIEI  
ALKILGNADYVFTSIFTLEIILKMTAYGAF LHKGSFCRNYFNILDLLVVSVSLISFGIQSSAINVVKI  
LRVLRVLRPLRAINRAKGLKHVVQCVFVAIRTIGNIVIVTLLQFMFACIGVQLFKGKLYTCS  
DSSKQTEAECKGNYYITYKDGEVDHPIIQPRSWENSKFDFDNVLAAMMALFTVSTFEGWPEL  
LYRSIDSHTEKGP IYNYRVEISIFFIYIIIIIAFFMMNIFVGFVIVTFQEQGEQYKNC  
ELDNQRQCV EYALKARPLRRYIPKNQH QYKVVVNVNSTYFEYLMFVLILLNTICLAMQHYGQ  
SCLFKIAMNILNMLFTGLFTVEMILKLI AFKPKGYFSDPWNVDFDLIVIGSII DVILSETNH  
YFCDAWNTFDALIVVGSIVDIAITE



VNPAEHTQCSPSMNAEENSRSITFFRLFRVMRLVKLLSRGEGIRTLTLLWTFIKSFQALPYVALLIVMLFFIYAVI  
GMQVFGKIALNDTTEINRNNNFQTFPQAVLLLFRFCATGEAWQDIMLACMPGKKCAPESEPSNSTEGETPCGSSFA  
VFYFISFYMLCAFLIINLFFVAVIMDNFDYLTRDWSILGPHHLDEFKRIWAEYDPEAKGRIKHLDVVTLRRRIQPP  
LGFGKLCPHRVACKRLVSMNMPLNSDGTVMFNATLFFALVRTALRIKTEGNLEQANEELRAI IKKIWKRTSMKLLD  
QVVPAGDDEVTVGKIFYATFLIQEYFRKFKRKEQGLVGVKPSQRNALSLQAGLRTLHDI GPEIRRAISGDLTAE  
ELDKAMKEAVSAASEDDIFRRAGGLFGNHVSYQSDGRSAFPQTFTTQRPLHINKAGSSQGDTESPSHEKLV DST  
FTPSSYSSTGSNANINNANNTALGRLPRPAGYPSTVSTVEGHGPPLSPAIRVQEVAVKLSNRERHVPMCEDLEL  
RRDSGSAGTQAHLRRANPSRCHSRESQAAMAGQEETSQDETYEVKMNHDTEACSEPSLLSTEMLSYQDDENR  
QLTLPEEDKRDIRQSPKRGFLRSASLGRRAFHFLECLKRQKDRGGDISQKTVLPLHLVHHQALAVAGLSPLLQRS  
HSPASFPRPFATPPATPGSRGWPPQVPVTLRLEGVESSEKLNSSFP SIHCGSWAETTPGGGSSAARRVRPVSLM  
VPSQAGAPGRQFHGSASSLVEAVLISEGLGQFAQDPKFI EVTTQELADACDMTIEEMESAADNLSGGAPQSPNG  
ALLPFVNCRDAGQDRAGGEEDAGCVRARGRPSEELQDSRVYVSSL

>NP\_000711.1|Homo\_sapiens\_CaV1.3

MMMMMMKKMQHQHQQQADHANEANYARGTRLPLSGEGPTSQPNSSKQTVLSWQAAIDAARQAKAAQTMSTSAPP  
PVGSLSQKRQYAKSKKQGNSSNSRPARALFCLSLNPIRRACISIVEWKPFDFIFILLAI FANCVLAIYIPFP  
EDDSNSTNHNLEKVEYAFLIIFTVETFLKIIAYGLLLHPNAYVRNGWNLLDFVIVIVGLFSVILEQLTKETEGGN  
HSSGKSGGFDVKALRAFRVLRPLRLVSGVPSLQVVLNSIIKAMVPLLHIALLVLFVII IYAIIGLELFIGMKHKT  
CFFADSDIVAEEDPAPCAFSGNGRQCTANGTECRSGWVGPNGGITNFDNFAFAMLTVFQCI TMEGWTDVLYWVND  
AIGWEWPWVYFVSLIILGSFFVLNLVGLVLSGEFSKEREKAKARGDFQKLREKQOLEEDLKGYLDWITQAEDIDP  
ENEEEGGEEGKRNTSMPTSETESVNTENVS GEGENRGCCGSLWCWRRRGAAGAGPSGCRRWGQAI SKSKLSRRW  
RRWNRFNRRRCRAAVKSVTFYWLVIIVLVFLNLTLSSEHYNQPDWLTQIQDIANKVLLALFTCEMLVKMYSGLQ  
AYFVSLFNRFDCFVCGGITETILVELEIMSP LGISVFRVRLLRIFKVTTRHWTSLSNLVASLLNSMKSIASLLL  
LLFLFIIIFSLGMLFGGKFNDETQTKRSTFDNFPQALLTVFQILTGEDWNAVMYDGIMAYGGPSSSGMIVCI  
YFIILFICGNYILLNVFLAIAVDNLADAESLNTAQKEEAEEKERKKIARKESENKKNKPEVNQIANSDNKVTI  
DDYREDEDEDKDPYPPCDVPVGEDEPEVPAGPRPRI SELNMKEKIAPIPEGSAFFILSKTNPIRVGCH  
KLINHHIFTNLILVFI MLSSAALAAEDPIRSHSFRNTILGYFDYAFTAIFTVEILLKMTTFGAFLHKGAFCRNYF  
NLLDMLVVGVSLSVFGIQSSAISVVKILRVLRLRPLRAINRAKGLKHVVQCVFAIRTIGNIMIVTLLQFMFA  
CIGVQLFKGKFYRCTDEAKSNPEECRGLFILIYKGDVDSPVVRERI WQNSDFNFDNVL SAMMALFTVSTFEGWPA  
LLYKAIDSDNGENIGPIYNHRVEISIFFIIYIIIVAFFMMNIFVGFVIVTFQE QGEKEYKNCELDKNQRQCVEYAL  
KARPLRRIYIPKNPYQYKFWYVNSSPFEYMMFVLI MLNLTCLAMQH YEQSKMFNDAMDI LNMVFTGVFTVEMVLK  
VIAFKPKGYFSDAWNTFDSLIVIGSII DVALSEADPTESENV PVPTATPGNSEENRSITFFRLFRVMRLVKLL  
SRGEGIRTLTLLWTFIKSFQALPYVALLIAMLFFIYAVI GMQMFVKVAMRDNNQINRNNNFQTFPQAVLLLFRFCATG  
EAWQEIMLACLPGKLCDPESDYNPGE EYTCGSNFAIVYFISFYMLCAFLIINLFFVAVIMDNFDYLTRDWSILGPH  
HLDEFKRIWSEYDPEAKGRIKHLDVVTLRRRIQPP LGFGKLCPHRVACKRLVAMNMPLNSDGTVMFNATLFFALVR  
TALKIKTEGNLEQANEELRAVIKKIWKKTSMKLLDQVVPAGDDEVTVGKIFYATFLIQDYFRKFKRKEQGLVGVK  
YPAKNTTIALQAGLRTLHDI GPEIRRAISCDLQDDEPEETKREEDDVFKRNGALLGNHVNHVNSDRRDSLQQTN  
TTHRPLHVQRPSIPPASDTEKPLFPPAGNSVCHNHHNHSIGKQVPTSTNANLNNANMSKAAHGKRPSIGNLEHV  
SENGHSSHKHDREPQRRSSVKRTRYET YIRSDSGDEQLPTICREDPEIHGYFRDPHCLGEQEYFSSEECYEDD  
SSPTWSRQNYGYYSRYPGRNIDSERPRGYHHPQG FLEDDSPVCYDSRRSPRRLLPPTPASHRRSSFNFECLRR  
QSSQEEVPSSPIFPHRTALPLHMQQIMAVAGLDSSKAQKYS PSHSTRSWATPPATPPYRDWTPCYTPLIQVEQ  
SEALDQVNGSLPSLHRSSWYTDEPDISYRTFTPASLTVPSSFRNKNSDKQRSADSLVEAVLISEGLGRYARDPKF  
VSATKHEIADACDLTIDEMESAASTLLNGNVRPRANGDVGPLSHRQDYELQDFGPGYSDEEPDPRDEEDLADEM  
ICITTL

>NP\_005174.2|Homo\_sapiens\_CaV1.4

MSESEGGKDTTPEPSPANGAGPGPEWGLCPGPPAVEGESSGASGLGTPKRRNQHSKHKTVAVASAQRSPRALFCL  
TLANPLRRSCISIVEWKPFDFILILLTIFANCVLGVYIPFPEDDSNTANHNLEQVEYVFLVIFTVETVLKIVAYG  
LVLHPSAYIRNGWNLLDFIIVVGLFSVLLEQGPGRPGDAPHTGGKPGGFVVKALRAFRVLRPLRLVSGVPSLHI

VLNSIMKALVPLLHIALLVLFV I IYAI IGLELFLGRMHKTCYFLGSDMEAEEDPSPCASSGSGRACTLNQTECR  
GRWPGPNGGITNFDNFFFAMLT V FQCVTMEGWTDVLYWMQDAMGYELPWVYFVSLVIFGSFFVLNLVGLVLSGEF  
SKEREKAKARGDFQKQREKQQMEEDLRGYLDWITQAEELDMEDPSADDNLGSMEEGRAGHRPQLAELTNRRRGR  
LRWFSHSTRSTHSTSSHASLPASDTGSMETETQGDEDEEEGALASCTRCLNKIMKTRVCRRLRRANRVLRARCRRA  
VKS NACYWAVLLLVLNLT LT IASEHHGQP V WLTQIQEYANKVLLCLFTVEMLLKLYGLGPSAYVSSFFNRFDCFV  
VCGGILETTLVEVGAMQPLGISVLRVCVRLRLRIFKVTRHWASLSNLVASLLNSMKSIASLLLLLFLFIIIFSLGGM  
QLFGGKFNFDQHTKRSTFDTFPQALLTVFQILTGEDWNVVMYDGMAYGGPFFPGMLVCIYFIILFCGNYILL  
NVFLAIAVDN LASGDAGTAKDKGGEKSNEKDL PQENEGLVPGVEKEEEEGARREGADMEEEEEEEEEEEEEEEEE  
GAGGVELLQEVVPKEKVPIPEGS AFFCLSQTNPLRKGCHTLIHHHVFTNLILVFIILSSVSLAAEDPIRAHSFR  
NHILGYFDYAFTSIFTVEILLKMTVFGAFLHRGSFCRSWFNMLDLLVVSLSISFGIHS AISVVKILRVLRVLR  
PLRAINRAKGLKHVVQCVFVAIRTI GNIMIVTLLQFMFACIGVQLFKGKFYTCTDEAKHTPQECKGSFLVYPDG  
DVS RPLVRERLWVNSDFNFDNLSAMMALFTVSTFEGWPALLYKAIDAYAEDHGPIYNYRVEISVFFIVYIIIIA  
FFMMNIFVGVFVIITFRAQGEQEYQNCELDKNQRQCVEYALKAQPLRRYIPKNPHQYRVWATVNSAAFEYLMFLLI  
LLNTVALAMQHYEQTAPFNYAMDILNMVFTGLFTIEMVLKIIAFKPKHYFTDAWNTFDALIVVGSIVDIAVTEVN  
NGGHLGESSESSRISITFFR LFRVMRLVKLLSKGEGIRTL L WTFIKSFQALPYVALLIAMIFFIYAVIGMQMFG  
KVALQDGTQINRNNNFQTFPQAVLLLFRCATGEAWQEIMLASLPGNRCDPESDFGPGEEFTCGSNFAIAYFISFF  
MLCAFLIINLFVAVIMDNFDYLTRDWSILGPHHLDEFKRIWSEYDPGAKGRIKHLDVVALLRRIQPPLGFGKLCPC  
HRVACKRLVAMNPLNSDGTVTFNATL FALVRTSLKIKTEGNLEQANQELRIVIKKIWKRMKQKLLDEVI PPPDE  
EEVTVGKFYATFLIQDYFRKFRRRKEKGLLGNDAA PSTSSALQAGLRS LQDLGPEMRQALTCDEEEEEEGQEGV  
EEDEKDL ETNKATMVSQPSARRGSGISVSLVPGDRLPDSLSFGPSDDDRGTPTSSQPSVPQAGSNTHRRGSGAL  
IFTIPEEGNSQPKGTGQNKQDEDEEVPDRLSYLDEQAGTPPCS VLLPPHRAQRYMDGHLVPRRRLLPPTPAGRK  
PSFTIQCLQRQGSCELDLPIPGTYHRGRNSGPNRAQGSWATPPQRGRLLYAPLLLVEEGAAGEGYLGRSSGPLRTF  
TCLHVPGTHSDPSHGKRG SADS LVEAVLISEGLGLFARDPRFVALAKQE IADACRLTLD EMDNAASDLLAQGTSS  
LYSDEESILSRFDEEDLGDEMACHAL

>NP\_446325.1|Rattus\_norvegicus\_CaV1.1

MEPSSPQDEGLRKKQPKKPVPEILPRPPRALFCLTLQNLPRKACISVVEWKPFETIILLTIFANCVALAVYLPMP  
EDDNNTLNLGLEKLEYFFLIVFSIEAAMKIIAYGFLFHQDAYLRSGWNVLD FII VFLGVFTAILEQVNI IQTNTA  
PMSSKGAGLDVKALRAFRVLRPLRLVSGVPSLQVVLNSIFKAMPLPLFHIALLVLFMVI IYAI IGLELFLKGMHKT  
CYFIGTDIVATVENEKPSPCARTGSGRPCTINGSECRGGWPGPNHGITHFDNFGFSMLTVYQCISMEGWTDVLYW  
VND AIGNEWPWIIYFVTLILLGSFFILNLVGLVLSGEFTKEREKAKSRGTFQKLEKQQLEEDLRGYMSWITQGEV  
MDVDDLREGKLSLDEGGSDTESLYEIEGLNKIIQFIRHWRQWNRVFRWKCHDLVKS KVFYWLVLIVALNTLSIA  
SEHNNQPLWLTHLQDVANRVLLALFTIEMLMKMYGLGLRQYFMSIFNRFDCFVVC SGILEILLVESGAMTPLGIS  
VLR CIRLLRLFKITKYWTSLSNLVASLLNSIRSIASLLLLLFLFMIIFALLGMQLFGGRYDFEDTEVRRSNFDFN  
PQALISVFQVLTGEDWNSVMYNGIMAYGGPSYPGVLVCIYFIILFVCGNYILLNVFLAIAVDNLAEAESL TSAQK  
AKAEERKRKMSRGLPDKSEERSTMTKKLEQKPKGEGIPTAKLKI DEFESNVNEVKDPYPSADFPGDDEE DEP  
EIPASPRRPLAELQLKEKAVPIPEASSFFIFSPNTKIRVLRCHRIVNATWFTNFILLFILLSSAALAAEDPIRAD  
SMRNQILEYFDYVFTAVFTVEIVLKMTTYGAF LHKGSFCRNYFNILDLLVAVSLISMGLESSAISVVKILRVLR  
VLRPLRAINRAKGLKHVVQCVFVAIRTI GNIVLVTLLQFMFACIGVQLFKGKFYSCNDLSKMTEEECRGYIIY  
KGDPTQIELRPRQWIHNDHFHFDNLSAMMSLFTVSTFEGWPQLLYKAIDSNEEDTGPVYNNRVEMAIFFIYII  
LIAFFMMNIFVGVFVIITFQEQGETEYKNCELDKNQRQC VQYAL KARPLRCYIPKNPYQYQVWYVVTSSYFEYLMF  
ALIMLNTICLGMQHYNQSEQMNHISDILNVAFTIIFTLEMIKLI AFKPRGYFGDPWNVDFLIVIGSII DVILS  
EIDTLLASSGGLYCLGGCGNVDPDESARISSAFFR LFRVMRLIKLLSRAEGVRTLLWTFIKSFQALPYVALLIV  
MLFFIYAVIGMQMFGKIAMVDGTQINRNNNFQTFPQAVLLLFRCATGEAWQEILLACSYGKRCDPESDYAPGEEY  
ACGTNFAYYYYFISFYMLCAFLIINLFVAVIMDNFDYLTRDWSILGPHHLDEFKAIWAEYDPEAKGRIKHLDVVTL  
LRRIQPPLGFGKFCPHRVACKRLVGMNPLNSDGTVTFNATL FALVRTALKIKTEGNFEQANEELRAI IKKIWK  
TSMKLLDQVIPIGDDEVTVGKFYATFLIQEHFRKFMKRQEEYGYRPPKDTVQIQAGLRTIEEEAAPEI HRAIS  
GDLTAEELERAMVEAAMEEGIFRRTGGLFGQVDNFLERTNSLPV MANQRPLQFAEMEMEELES PVFLED F P Q N  
PGTHPLARANTNNANANVAYGNSSHRNSPVFSSIRYERELLEAGRPV TREGPFSQPCSVSGVNSRSHVDKLERQ

MSQRRMPKGQVPPSPCQLSQEKHPVHEEGKGRSWSTETSDSESFEERVPRNSAHKCTAPATTMLIQEALVRGGL  
DSLAADANFVMATGQALADACQMEPEEVEVAATELLKRESPKGGAMPREP

>NP\_036649.2|Rattus\_norvegicus\_CaV1.2

MIRAFAPSTPPYQPLSSCLSEDTERRKFKGKVVHEAQLNCFYISPGGSNYGSPRPAHANMNANAAAGLAPHEHIPT  
PGAALSWQAAIDAARQAKLMGSAGNATISTVSSTQRKRQYQKPKKQGGTTATRPPRALLCLTLKNPIRRACISI  
VEWKSFEIIILLTIFANCVALAIYIPFPEDDSNATNSNLERVEYFLIIIFTVEAFLKVIAYGLLFHPNAYLRNGW  
NLLDFIIVVVGLFSAILEQATKADGANALGGKAGFDVKALRAFRVLRPLRLVSGVPSLQVVLNSIIKAMVPLLH  
IALLVLFVIIYAIIGLELFMGKMHKTCYNQEGIIDVPAEEDPSPCALETGHGRQCQNGTVCKPGWDGPKHGITN  
FDNFAFAMLTVFQCITMEGWTVDVLYWMDAMGYELPWVYFVSLVIFGSFFVLNLVGLVLSGEFSKEREKAKARGD  
FQKLREKQQLEEDLKGYLWDWITQAEDIDPENEDEGMDKPRNMSMPTSETESVNTENVAGGDIEGENCGARLAH  
RISKSKFSRYWRRWRNRCRRKCRAAVKSNVFWLVI FLVFLNLTITASEHYNQPHWLTEVQDTANKALLALFTAE  
MLLKMYSGLQAYFVSLFNRFDCFIVCGGILETILVETKIMSPLGISVLRVRLRLRIFKITRYWNSLSNLVASLL  
NSVRSIASLLLLFLFIIIFSLGMLQFSGGKFNDEMQRTRSTFDNFPQSLTTFVQIILTGEDWNSVMYDGMAYG  
GPSFPGMLVCIYFIILFICGNYILLNVFLAIAVDNLADAESLTSAQKEEEEEKERKKLARTASPEKKQEVMEKPA  
VEESKEEKIELKSITADGESPTTKINMDDLQSPENEDKSPHSNPDTAGEEDEEPEMPVGPVGRPRPLSELHLKEK  
AVPMPEASAFFIFSPNNRFRQLCHRIVNDTIFTNLILFFILLSSISLAAEDPVQHTSFRNHILFYFDIVFTTIFT  
IEIALKMTAYGAFLHKGFSFCRNYFNILDLLVSVSLISFGIQSSAINVVKILRVLRVLRPLRAINRAKGLKHVVQ  
CVFVAIRTIGNIVIVTTLQFMFACIGVQLFKGKLYTCSDSKQTEAECKGNYITYKDGEVDHPIIQPRSWENSK  
FDFDNVLAAMMALFTVSTFEGWPELLYRSIDSHTEDKGPIYNYRVEISIFFIYIIIIAFAFMNIFVGFVIVTFQ  
EQGEQYKNCELDKNQRQCVEYALKARPLRRYIPKNQHQYKVWYVNVNSTYFEYLMFVLI LLNTICLAMQHYGQSC  
LFKIAMNILNMLFTGLFTVEMILKLI AFKPKHYFCDAWNTFDALIVVGSIVDIAITEVHPAEHTQCSPSMSAEEN  
SRISITFFRFLFRVMRLVKLLSRGEGIRTLTLLWTFIKSFQALPYVALLIVMLFFIYAVIGMQVFGKIALNDTTEINR  
NNNFQTFPQAVLLLFRCATGEAWQDIMLACMPGKKCAPESEPSNSTEGETPCGSSFAVFYFISFYMLCAFLIINL  
FVAVIMDNFDYLTRDWSILGPHHLDEFKRIWA EYDPEAKGRIKHLDVVTLRLRIQPPLGFGKLCPHRVACKRLVS  
MNMPLNSDGTVMFNATL FALVRTALRIKTEGNLEQANEELRAIKKIWKRTSMKLLDQVVPVPPAGDDEVTVGKFYA  
TFLIQEYFRKFKRKEQGLVGKPSQRNALSQAGLRLTHDIGPEIRRAISGDLTAE EELDKAMKEAVSAASEDDI  
FRRAGGLFGNHVSYYQSDSRSNFPQTFATQRPLHINKTGNNQADTESPSHEKLV DSTFTPSSYSSTGSNANINNA  
NNTALGRFPHPAGYSSTVSTVEGHGPPLSPAVRVQEA AWKLSKRCHSRESQGATVSQDMFPDETRSSVRLSEEV  
EYCSEPSLLSTDILSYQDDENRQLTCL EEDKREIQSPKRSFLRSASLGRRAS FHLECLKRQKDQGGDISQKTAL  
PLHLVHHQALAVAGLSPLLQRSHSPSTFPRPRPTPPVTPGSRGRPLQPIPTLRLEGAESSEKLNSSFPSIHCSSW  
SEETTACSGGSSMARRARPVSLTVPSQAGAPGRQFHGSASSLVEAVLISEGLGQFAQDPKFIEVTTQELADACDM  
TIEEMENAADNILSGGAQQSPNGTLLPFVNCRDPGQDRAVPEDESCVYALGRGRSEALPDSRSYVSNL

>XP\_006252652.1|Rattus\_norvegicus\_CaV1.3

MMMMMMKKMQHQHQQQEDHANEANYARGTRLPISEGPTSQPNSSKQTVLSWQAAIDAARQAKAAQTMSTSAAPP  
PVGSLSQKRQYAKSKKQGNSSNSRPARALFCLSLNPIRRACISIVDWKPFDFILLAI FANCVALAIYIPFP  
EDDSNSTNHNLEKVEYAFLLIIFTVETFLKI IAYGLLLHPNAYVRNGWNLLDFVIVIVGLFSVILEQLTKETEGN  
HSSGKSGGFDVKALRAFRVLRPLRLVSGVPSLQVVLNSIIKAMVPLLHIALLVLFVIIYAIIGLELFIGKMHKT  
CFFADSDIVA EEDPAPCAFSGNGRQCAANGTECRSGWVGPNGGITNFDNFAFAMLTVFQCITMEGWTVDVLYWVND  
AIGWEWPWVYFVSLIILGSFFVLNLVGLVLSGEFSKEREKAKARGDFQKLREKQQLEEDLKGYLWDWITQAEDIDP  
ENEEEGGEEGKRNTSMPTSETESVNTENVSGEGETQGCCGLWCWKRRAAKTGPSGCRRWGQAI SKSKLSRRW  
RRWRNFRNRRCRAAVKSVTFYWLVI VLVFLNLTITISSEHYNQPDWLTQIQDIANKVLLALFTCEMLVKMYSGLQ  
AYFVSLFNRFDCFVVCGGITETILVELELMSPLGVSVFRCVRLRLRIFKVTRHWTSLSNLVASLLNSMKSIASLLL  
LLFLFIIIFSLGMLQFSGGKFNDETQTKRSTFDNFPQALLTTFVQIILTGEDWNAVMYDGMAYGGPSSSGMIVCI  
YFIILFICGNYILLNVFLAIAVDNLADAESLNTAQKEEAEEKERKKIARKE SLENKKNKPEVNQIANS DNKVTI  
DDYQEEAEDKDPYPPCDVPVGE EEEEEEEDEPEVPAGPRPRISELNMKEKIAPIPEGSAFFILSKTNP IRVGCH  
KLINHHIIFTNLILVFI MLSSAALAAEDPIRSHSFRNTILGYFDYAFTAIFTVEILLKMTTFGAFHKGAFCRNYF  
NLLDMLVVGVSLSVSGIQSSAISVVKILRVLRVLRPLRAINRAKGLKHVVQCVFVAIRTIGNIMIVTTLQFMFA

CIGVQLFKGKFYRCTDEAKSNPEECRGLFILIYKGDVDVSEVVRERIWQNSDFNFDNVL SAMMALFTVSTFEGWPA  
LLYKAIDSNGENVGPVYNYRVEISIFFIIYIIIVAFFMMNIFVGFVIVTFQEQQEKEYKNCELDKNQRQCVEYAL  
KARPLRRYIPKNPYQYKFWYVNVSSPFYEYMMFVLIIMLNTLCLAMQHYESKMFNDAMDILNMVFTGVFTVEMVLK  
VIAFKPKGYFSDAWNTFDSLIVIGSIIIDVASEADPSDSENIPLPTATPGNSEESNRISITFFRLFRVMRLVKLL  
SRGEGIRTLTLLWTFIKSFQALPYVALLIAMLFFIYAVIGMQMFGKVMARDNNQINRNNNFQTFPQAVLLLFRCATG  
EAWQEIMLACLPGKLCDPDSYNGPEEYTCGSNFAIVYFISFYMLCAFLIINLFVAVIMDNFDYLTRDWSILGPH  
HLDEFKRIWSEYDPEAKGRIKHLDVVTLRRIQPPLGFGKLCPHRVACKRLVAMNMPLNSDGTVMFNATL FALVR  
TALKIKTEGNLEQANEELRAVIKKIWKKTSMKLLDQVVPAGDDEVTVGKIFYATFLIQDYFRKFKRKEQGLVGK  
YPAKNTTIALQAGLRTLHDIGPEIRRAISCDLQDDEPEDSKPEEEDVFKRNGALLGNVNVHNSDRRESLQQTNT  
THRPLHVQRPSIPPASDTEKPLFPAGNSVCHNHNHNSIGKQVPTSTNANLNNANMSKAAHGKRPSIGDLEHVS  
ENGHYSYKHDRELQRRSSIKRTRYETIRSESGDEQLPTICREDPEIHGYFRDPRCFGEQYFSSSECCEDDSS  
PTWSRQNYSYNRYPGSSMDFERPRGYHHPQGFLDDDDSPIGYDSRRSPRRLLPPTPPSHRRSSFNFECRRQN  
SQDDVLPSPALPHRAALPLHLMQQQIMAVAGLDSSKAQKYS PSHSTRSWATPPATPPYRDWTPCYTPLIQVDRSE  
SMDQVNGSLPSLHRSSWYTDEPDISYRTFTPASLTVPSSFRNKNSDKQRSADSLVEAVLISEGLGRYARDPKFVS  
ATKHEIADACDLTIDEMESAASTLLNGSVCPRANGDMGPI SHRQDYELQDFGPGYSDEEPDPGREEEDLADEMIC  
ITTL

>NP\_446153.2|Rattus\_norvegicus\_CaV1.4

MSESEVGKDTTPEPSPANGTGPPEWGLCPGPPTVGTDTSGASGLGTPRRRTQHNKHKTVVVASAQRSRALFCL  
TLTNPIRRSCISIVEWKPFDILILLTIFANCVALGVYIPFPEDDSNTANHNLEQVEYVFLVIFTVETVLKIVAYG  
LVLHPSAYIRNGWNLLDFIIVVGLFSVLEQGPGRPGDAPHTGGKPGGFVDKALRAFRVLRPLRLVSGVPSLHI  
VLNSIMKALVPLLHIALLVLFVIIYAIIGLELFLGRMHKTCYFLGSDMEAEEDPSPCASSGSGRSCTLNQTECR  
GRWPGPNGGITNFDNFFFAMLTVFQCITMEGWTDVLYWMQDAMGYELPWVYFVSLVIFGSFFVLNLVLGVLSGEF  
SKEREKAKARGDFQKLRKQMEEDLRGYLDWITQAEELDLHDPSVDGNLASLAEGRAGHRPQLSELNRRRGR  
LRWFHSTRSTHSTSSHASLPASDTGSITDTPGDEDEEEGTMASCTLCLNKIMKTKVCRHFRRANRGLRARCRRA  
VKSNAZYWAVLLLVLNLTITASEHHGQPVWLTQTQYANKVLLCLFTVEMLLKLYGLGPSVYVASFFNRDFCFV  
VCGGILETTLVEVGAMQPLGISVLRVRLRLRIKRVTRHWASLSNLVASLLNSMKSIASLLLLLFLFIIIFSLGGM  
QLFGGKFNFDQHTKRSTFDTFPQALLTVFQILTGEDWNVVMYDGMAYGGPFFPGMLVCVYFIILFICGNYILL  
NVFLAIAVDNLAGDAGAAKDKGREKSSEGNPPQENKVLVPGGENEDTEGKSEGAAPGMEEEEEEEEEEEEEENG  
AGHVELLQEVVPKEKVVPIPEGSAFFCLSQTNPLRKACHTLIHHVFTSLILVFIILSSVSLAAEDPIRAHSFRN  
HILGYFDYAFTSIFTVEILLKMTVFGAFLHQGSFCRSWFNLLDLLVVSVSLISFGIHSSAISVVKILRVLRLVLRP  
LRAINRAKGLKHVVQCVFVAIRTIGNIMIVTLLQFMFACIGVQLFKGKFYSCTDEAKHTLKECKGSFLIYDPGD  
VSRPLVRERLWVNSDFNFDNVL SAMMALFTVSTFEGWPALLYKAIDAHAEDEGPIYNYHVEISVFFIVYIIIIAF  
FMMNIFVGFVITTFRAQGEQYQNCCELDKNQRQCVEYALKAQPLRRYIPKNPHQYRVWATVNSAAFEYLMFLLIL  
LNTVALAMQHYESQTAPFNYAMDILNMVFTGLFTVEMVLKI IAFKPKHYFADAWNTFDALIVVGSVVDIAVTEVNN  
GGHLGESSEDSSRISITFFRLFRVMRLVKLLSKGEGIRTLTLLWTFIKSFQALPYVALLIAMIFFIYAVIGMQMFGK  
VALQDGTQINRNNNFQTFPQAVLLLFRCATGEAWQEIMLASLPGNRCDPESDFGPGEEFTCGSNFAIVYFISFFM  
LCAFLIINLFVAVIMDNFDYLTRDWSILGPHHLDEFKRIWSEYDPGAKGRIKHLDVVALLRRIQPPLGFGKLCPH  
RVACKRLVAMNVPLNSDGTVTFNATL FALVRTSLRIKTEGNLDQANQELRMVIKKIWKRIKQKLLDEVI PPPDEE  
EVTVGKIFYATFLIQDYFRKFRRRKEKGLLGADAPTSTSSVLQAGLRSQDLGPEIRQALTYDTEEEEEEEEEAAGQ  
EAEAAAAENNPETYKDSIDSQPQAQWNSRISVSLPVKEKLPDSLSTGSPDDDGVPNSRQPSGLQAGSQPHRRSS  
GVFMFTIPEEGSTQLKGVQGDQNDQNEEQEVPDWTPNLDEQAGMPSNPVLLPPHWSQQHVNGHHVPRRRLLPPTPA  
GRKPSFTIQCLQRQGSCELDLPIPGTYHRGRTSGPGRAQGSWAAPPQKGRLLYAPLLLVEESTVGEGLGKLGGLPL  
RTFTCLQVPGAPSDPSHRKRSADSLVEAVLISEGLGLFAQDPRFVALAKQEIADACHLTLDDEMDSAASDLLAQR  
TTSLYSDEESILSRFDEEDLGDEMACVHAL

>BAA34927.2|Halocynthia\_ roretzi\_CaV1

MNGTTNPTTRKRKIKPDPNAGRAPQALLCLSLKNPIRKACMKIVDWRPFVLIILLTILANCVALAVYVFPFGDDS  
NRTNEILEKVEYIFLGI FTIEAILKIIAYGLFFHPNAYLRNGWNVIDFVIVVIGLVSIVLETANVGSTDKVRSR

AFRVLRLPLRLVSGVPSLEVVLNAIIRAMVPLLHIALLLVIFVIIIIYAVVGLLELFKGLHKTCTYHNEVAVLIMEDEA  
KPCADSDSWGRHCSGGMICESDWAGPSKGIINFDTFYFAVITVFQCITMEGWTDVLYYMNDVAVGNLWPWIYFVSL  
IIIGSFFVMNLILGVLSGEFSGKEREKANARGEFQKLREKQQTDEDMKGYMDWITQAEIDLPMNDEDREDRRSASN  
EQLNDADSEVSGLOIDETWWQMQRALFKVCYSRRWRWRNRKTRRRRCRTMVKSKSFYWLVIIVLVFCNTLSLATEH  
YRQPWLTLAQDLANKILLTLFTIEMLVKMYSLGMQQYFVSLFNRFDVFCVCGGIVELVLTSSKIMEPLGISVLR  
CVRLLRIFKMTSSWNSLSNLVASLLNSIRSIALLLVLLFLFIIIFALLGMQMFGRFSEIEQEDKIRSNFDTFLO  
ALLTVFQILTGEDWNVVYNGIEAYGGASTIGLLTSVYFIVLFIGGNYILLNVFLAIAVDNLADAESLGAAQKEK  
EEEKKMKKTLRLKLRKLFKFKKQTSVENQEVNQEDTLNRVEEMPNYTDPDHDIRIEVTEASDTNSDKHLPEVSD  
GEMEPEVPVGPVPRRMSMHLSEKKVPLPEGSSFFILSNTNRLRVFCYDIVNWNFNAILACIILSSIALACED  
PVSASARNKVLEYFDYVFTGVFAVEIVLKMTAFGVFLHKGSGFRSIFNLLDLLVAVSLVSMNSNDKFSVVKI  
LRVLPVLRPLRAINRAKGLKHVVQCVFVAISTIGNIMVITGLLQFMFACIGVQLFKGRLYYCTDQSKETKEECH  
GKFFVYSKDGNGEPRVEERLWENSEFNVDNVMNAMLTFFVATFEGWPGLLYKSIDSWSENHGPRYDARQAVAF  
YFVFIIVIAFFMMNIFVGFVIVTFQEQEQEYKNCELDKNQRQCLEYALKAKPKRYIPKNPWQYKVFIVNSTY  
FEYFMLVILLNTVCLAVQHHQQSKELTVILNHMNYVFTALFALEMIVKLVAYKPRGYLSDPWNVFDLIVIGSI  
VDIVFSELDHGNEKSFSINFFRLFRVLRVLLSRGEGIRTLTLLWTFIKSFPALPYVALLIMLFFIYAVIGMQIF  
GKIKPNDGSQINRNNNFQTFLQAVLLLFRCATGESWQEVMLACASGNECDDSDWNYYGDKDISAKFTCGNDFAY  
TYFLTIFYMLCAFLIINLFAVIMDNFDYLTRDWSILGLHHLDEFVRVWSEYDHEASGRIKHLHVVKLLRHIQPLL  
GFGKLCQPORMACRKLVSMMNPLNSDGTVMFNATLFAVLRVTSKLIKSEGNIQANEELRAVIKKIWKRTSMKLLDQ  
VPPAGNDDVTVGKFYATYLIQDYFRKFKEKERRLRERDRHHPNNANTLTQAGIREVQDVSPELKRSISGNL  
VPNEYEESELVSMDDPEHRRRHSIFGQLRSLASPGTPVMTSRRPLTVSDNTPAVGHRKHEQNSDQNPVLRNLT  
QQPFPNATPSHAQATEKSVNRSLDGIHTMPRDANIGRHHGSIDDFSRYHKSPTQPDGFVVEPTFTSPSHNTNRNN  
SANPTECMVHRPNGKCQKMQRAYSEEDKGERGDRNFIVPYLSMDGGMNTVQHWGRDAREQRPCYCGKPRLLRPC  
SKRSLNLDYTPLQRNETPVKSPTTENLSKRTLQSCDRSFSFPGKNRIDSFTSIEDECLLSRDSRDADSIFFNEIG  
GSGISSSDSDFESDSGSCDDECGSVRTYRTANTISPOCAFKTFSEVNSQPGSKSDVGVTRKLPPTPEAPSRIFR  
LPMMSKNWRKSRENMPLCDIKTSETAPLINSRNETSFHRNSIPRHLTRQFSTNYDNRHHADDMDYRRDNEVIY  
NKGDDGRGCSKTRSFVQIFQSLTNGDSDNDSTNVCQPKSYCRSDSVWDEEEETPIKRSQVEISPSGSRTRSPPVR  
NGHEGCIERDEEADLASEMIVPNVK

>XP\_019624050.1|Branchiostoma\_belcheri\_CaV1

MPSRSRVIRSRRTPTPTGSTKSKDSSSMTPTMDRVNNGRKRDLPGRRRYSSSSTQRYSTSPSPTLPPASTGS  
SLGATVAQSPNPPPLSNRWQTTLVMTAAANKRKRQOQGPYWPALFCLGLKNPIRRACMYIVEWKPFYEFILL  
AIFANCVALAVYPYPEKDSNEANQOLETVEYFLFLVIFTLEAVFKIIAYGLIAHNGAYLRNFWNILDFTIIVIGI  
VSIVLETYKFEGFDVKALRAFRVLRPLRLVSGVPSLQVVLNSILKALVPLLHIALLLCLFVIIIIYAIIGLELFSGK  
LHTTCFVPGSDQIYFHDGPPPCQPDFGSSGYHCPVNVSICRGYWEGPNSGITNFDNFGLAMLTVFQCMTEGWTT  
VLYWVNDVAVGNEWPWIYFITLIVGSFFVLNLVGLVLSGEFSGKEREKARSRGEFQKLREKQQMEDDLHGYLEWIIY  
HAEDLDEGRGREEEKSMPHHKRIAKTLFPLRKGKIALFRGQEKASDAGSASEALEAGEGPIGAEPGWARHNAG  
PTNCLRWRRTNRLIRRQLRAAVKTTVFYWFVIVMVLNTCTLASEHYRQPPWLEEVQKISNFFVSLFSLEMV  
KMYALGWQAYQVSLFNRFDVVISSIIIEIILTETGVIQPLGVSVLRVLRVFKVTKYWRALSNLVASLLNSI  
RSIALLLLLLFLFILIFALLGMQIFGGKFNFDQTQKDRSNFDTFWQSLTTFQILTGEDWNEVMYTGIOQSYGGV  
SQIGILACFYFIILFICGNFILLNVFLAIAVDNLADADALTEAEAEAEAEKEAKKEEELKALSSAEKPAEGSPK  
MNHTGGGKPKGRSQESMEMRPI SPESASSHTKVKIDVTDTTQTDIDEAEAEDEEKDKAAGEGGGEELSDEAAAAGL  
PWDEEDDDDEEGLKPTPVGARPRRMEVYIPEDEKLPIPEYSAFFIFSPTNLLRKICHRIITHPVFTNLILALILI  
SSAALAAEDPLRAESPRNII LGYMDYVFTSAFTIEIILKVIVFGFIMHPSGFCRSANLDDLLVSVSLISIAFP  
KGGVSVVKILRVLRVLRPLRAINRAKGLKHVVQCVFVAIKSIGNIMLVTFLLQFIFAVIGVQLFKGTFFQCND  
KKTAAECKGYIYIDGNVENAEQKEREDVNVFNDDVGQAMLSLFTVSTFEGWPNNLLYVAIDSRAEDMGPIYN  
YRPAVAIFFFVYIIIIAFFMVNI FVGFVIVTFQNEGEKEYGDECEL DKNQRQCIEFALKAKPLRRYVPKNPIQYK  
FWYVNSQTFEYTMFILIMLNTVSLAMKHYGQSETYEYALDFMNLIFTALFTLEAMLKLI GFPGKYFKDAWNTF  
DFLIVVGS�VDIIVSQMNPGEVPSINFFRLFRVMRLIKLLSRGEGIRTLTLLWTFIKSFQALPYVALLIMLFFIY  
AVVGMQMFVKIELNDDTAIHRNNNFQTFPQAVLLLFRSATGEAWQEIMMSCTAGSGAMCDENS DSKGQVCGSNFA

YPYFLSFYMLCAFLIINLFFVAVIMDNFDYLTRDWSILGPHHLDEFVRVWSEYDPDAKGRIKHLDVVTLRLRISPP  
LGFGKLCPHRVACKRLVSMNMPLNSDGTVMFNATLFFALVVRTGLKIKTEGNIDQANEELRAIIKKIWKRTNPKVLD  
QVCPAGDDEITVGKIFYATFLIQDYFRKFKRRQEEDEGEEQYNKDAIRLQAGLRTLHDIGPEIRRAISGNLEEQL  
AAEGIDIGDSEEPSHRNHSFLGNHTESPVRSNSLRKTSFVNSYMPNSLDTNTNANANVNTNANSIKPAEAAKN  
PTDKNKKDTADLNNSIHQDPDRIHSPPELVRSPEMDRPLGNMRSSGGLRSPPGNMQSPGTIRSPMGLRSPSPGEIRS  
PVEYEEYDDDEDPEVEVVHPDDVDEPFFTAATMDAPYWRQPSSETEDERKPLRPKEHPKRHRERDLRYDSSRDS  
DYYSRDYDYGYGYYTDREGRPDWMPQRREAGQPHYSPSPRRSPSRKRYGEDQLPMPKRGAGTTRYTQQQAI  
AGQPPSGGYDITENNWRTPSSPGRVRSYPTPAGRPQSVISTSSTPARGNSGGVRSRSGWDYNNIPKRD  
FYEGLKTGSLGPNSEQRHSRNSRYDSHAMNLVEQVLVQEGLGRYADDHLVNVAKHELAEACDMTPAELDYAAQE  
MMREQGYDMTESSYHFDYPYLEHMGGSYDLDPYPPVTHGNNPRRLPEENYVRHPPEGDRDHMHRPAGPLSSSS  
HEASMVTL

>NP\_001118235.1|Strongylocentrotus\_purpuratus\_CaV1

MTFAGESPVNNAASAGTGSSGTYVTGTVPLSRPGPTTRPPAAAGSTTTTAVAAATTTTTTAPPSNAAAAPDPPGP  
DQDGAVALKQPLSNAWVQALAAANTANSMKYGKKKQHIGAPTRPPRSLFCLTLDNPMRRMCISIVEWKPFYELILI  
TIFANCIALATYTPFPKQDSNDVNRNLEYVEYAFLIIFLIEALLKICAQGFLFHPGAYLRNGWNILDFLIVAVGV  
ISTILSLRNVENTNFDVKALRAFVRFRPLRLVSGVPSLQVVLNSIFRAMVPLLHIALLVIFVIIYAVIGLELFM  
EYMHKTCYFKDTSIIAMDDPHPCGNFRCTDLLEVGINNTDCLEKWEQPNMGITTFDNI GLAMLTVFQCI TMEGW  
TDIMYDINDGAGPWWPFLYFVSLIIIGSFFVLNLVGLVLSGEFSKEREKAKARGAFQKLREKQIEEDLRGYLDW  
ITQAEDIDPDNDSEQNPVPKPISESDSDDKSEEMGSSEI PQQQWMQKERRQLRRWNRRRCRRLCRQAVKSQAFYWI  
VIIMVFFNTVILASEHYSQPAWLTDQDFGNLCFVVIIFTIEMI IKMYSLGLQGYFVSLFNRFDCFVVCSSIEV  
FIYAHII PPIGISVLRVRLRLRVFKATRYWTALRNLVASLLNSMRSIASLLLLLFLFILIFALLGMQVFGGHFNF  
DSTKLKPRSNFDSFFQSLFTVFQILTGEDWNEVMYDGIQAYGGVKSIGFLASTYFIILYICGNYILLNVFLAIAV  
DNLADAESLTALEKEKEKEEKRNNHPWTQEVTEGEEESYEDDKEEEEAESLTTASARPRRLSNINIPKTRPIKAN  
SLFVFSNTNRFRLCYNLVNHYPFTNVVVLVILISSTMLAAEDPLDEDKRRNYILSLFDYGFTSIFTIEILLKVV  
AYGLVFHQGAFCRNSFNLLDLLVTVAYISIIFFDTKISAVKTLRVLRLRPLRAINRAKGLKHVVQCVFVAIKT  
IGNIMLVTLVLLVFMFACIGVQLFRGRFFSCNDSSKLYEEDCQGHYFVYKNGDLDQVSVEQRVWSKNEFHFNVDGN  
AMLALFTVATFEGWPKLLLYVAVDSTEDDKGPVHSSRMPVAVFFAYIIVIAFFMVNI FVGFVIVTFQNEGEQEYK  
NCELDKNQRNCLAFALKAKPVRKYIPKNPKQHLVWKLVT SRAFEYFIFVLIMVNTIILAMKYRTQTEAYKNVLDY  
MNIVFTAVFTVEFLKI IAYKPKNYFRDYWNAFDFIIVLGSIIDIMIDMFSANEKKQFSINFFRLFRVMRLIKLL  
SRGEGIRTLTLLWTFIKSFQALPYVALLIVMLFFVYAVIGMQMFGKIKLSLDGALNRNNNFRTFPTAVMVLFRSATG  
EAWQQIMMACSQSPKAPCQRDDTEICGNNFAYVYFISFY SICSFLIINLFFVAVIMDNFDYLTRDWSILGPHHLDE  
FVRQWSEFDPDATGRIKHLDVVTLRLSISPP LGFGKLCPHRIACKRLVTMNMPLNSDGTVMFNATLFFALIRTSK  
IKTEGNIDQCNEELRAVIKKIWKRTSTKLLDQVAPPAGADDDVTVGKIFYATFLIQDYFRFKRQKQEGKIPGQP  
DSTFALQAGLRTLHEIGPQIKRAISGNLEGM DENEQFEHDEPNHRRSHSLFGTVLNMYHNRRQSTPMANTHYQGR  
DPPPAYYPNNATNNLVSSPPSNQHRKLS PANSLNNYHNPNQKSPFNMSSSKSPSAIRGRGGPYSPNANSLQVSS  
PHTRGFSVGNRNPGRGMPNRRGPGNRYSTKEGRQPLLQNE DRHHHHHHNNHHHSPDSPYDDDDVEEIEPKAP  
SSPQVVDEEYQPEPYQQPYREPYRDYSREPPTLRTECYQEEEDNLSETSSHPTSPLLSPQRSPSSSRGHSPTP  
PPHQNSSNHPSSPSTKLTLDFTTVPSPTETSLPKLEGESIGRSVTHSPRKS PAGSPSRLLLLPSGKSDGLVP  
AGDRKTAVPLKLAQAQVMAVAGMTPEGKTRNSTGRMWLTPPSSPRRIRSSLHTPAPRPTTQSSHLLPTTGSTNS  
TSTHMMVKEPLAQRHSTGEIGTSRDPSAAFFKSLTKPKTSVPRNNPSPEEVAGSAESLVAQVLAGEGISPIRDRD  
LINMAERELAEACNMTQAQLDSA AHRI LFPKDKLANVPVVT TTTVTQDTQLPYFDHLGGYELRDYTRRSGGHDRTN  
DDDDEEGRRAGREADSDTESGTIEADEHGVLYVTTL

>NP\_525104.3|Drosophila\_melanogaster\_CaV1

MNTGDRKEQASLTPQQQQSPQQPEQQQPI TRHDALDSSSANNKLNHKNNDKDKDTTSDKNWEAGRDL LPASVVI  
VDESCASKSQKQPIEPSIVSRGATSSSQRRRQLQFQRQKEAKLYDRGDGDRDREREREASTSTSTSTASATTTT  
NTVMGGGELVNCAIYDDNTLVIERKPSPPSPSTRRYLKAETPTRGSRKYNRKSSAKSDLEV VVVV KPEHHHQHRS  
PTITLVPANPLTTSASAGSSPTGAGLAAGLGTASGTVLQQSCSALDPPEDSNQPSGTRRRPTSTELALSNTVTSQ





VAAYYIIYIIIIIAFFMVNIFVGFVIVTFQNEGEQEYKNCELDKNQRNCIEFALKAKPVRRIYIPKHRIQYKVVWFV  
TSQPFYEYTIIFTLIMINTVTLAMKFYRQPEIYTQALDVLNMIFTAVFALEFIFKLAAFRFKNYFGDAWNVDFIIV  
LGSFIDIVYSEVNPSTIISINFFRLFRVMRLVKLLSRGEGIRTLTLLWTFIKSFQALPYVALLIIMLFFIYAVIGM  
QVFGKIAIDDETSINRNNNFQSFPPQAVLVLFRSATGESWQEIMMDCSVQPGKVKCDPNSDEALNTNGCGSDIAFP  
YFISFYVLCSEFLIINLFVAVIMDNFDYLTRDWSILGPHHLDEFIRLWSEYDPDAKGRIKHLDVVTLRKRISPPLG  
FGKLCPHRVACKRLVSMNMPLNSDGTVLFNATLFAVVRTSLRIKTEGNIDDANAELRAVIKKIWKRTSPKLLDQV  
VPPPGGDDEVTVGKFYATFLIQDYFRFRFKRKEQEMKDGKECHNTVTLQAGLRTLHEAGPELKRAISGNLEELL  
DDNPEPMHRRNHSLFGSVWSSMRKGHHSFNRRARSLKVNSTSKASPTNSIDFVPYSSFHRGGGDPSNQITARSHQV  
VENVAGGLSDSAMNQMGIDPKLTGIEESIPLRPLAVFGNPNVQQQSYHHTSYKVLVDVQDGIERQLTPPTPPPRNP  
PPPPPLPPLPPQSIDPASTGTLHSAQVSSGKSASATTSIATCTNTSTATSSPSLGSSSNGIRCYATRGCVCDC  
AVWSNHAIDREDFGDSSATSEYSESGSRGSAGSRGSGMSSNGWSNSEKIGGGGDEGVGGGGGGIGGGGGGGG  
GSLRQLAVAGSRCRVQSGRDPLVGKSAPSSFRKRDGTGGGGQSSSSATSASTGFARSVANGLKLAQTQAIIVAGF  
LADVDSRHRDICASCLSHRASYHGRERLSHSLPGSPADRKNFEVIGSAESLVGRVLVEQGLGKYCDPDFVRYTS  
REMQEALDMTREEMDRAAHQLLLQERRGQPLSYQLQQGVQQWTSSYQPSQSTGIGYQPLQEQQSSGQPRQYRSY  
YRGGGQATTTSDPSSIQQQQQQQQQQQQQQQQQQQQQSSPPS

>AA083839.1|Lymnaea\_stagnalis\_CaV1

MASSPTGVHNDQPTGQHREIGGGGGHNPGGAVNSPSGAGGGGGRRGGGGGEDPGGTGGGSGYKPLVPQNTTALATV  
VGGLSLNNTTDSGRALSTGWSTALAAAQGAATVRKRANMRKQONQNVPRALFCLTLKNPIRKFCIQVAEYKAFE  
FLVLITIFANCVALAIYTPYMSDSNEVNSALDRIEYVFLVIFLLEGILKIIAYGFVMHQGAYLRNGWNALDFTI  
VVIGI ISSILSFVQEKGFVDKALRAFRVLRPLRLVSRAPSLQVVLNSIVRAMVPLLHIALLVIFVIIYAIIGLE  
LFYGLKLNACYKINSTEFSGDPRICGQGYSCDDIASGGEKGECEGREGWEGPNYGITNFDNFGLAMLTVFQITMEG  
WTTVLYDVNNALGNEPWIYFISLIIIGSFFVLNLVGLVLSGEFSGKEREKAKARGDFQKLRKQQLLEEDLRGYLD  
WITQAEDIDPEVEDENEEGATPRHSKITSDIDSEDKVEEENVEIQQSWLQQKRLHLQKLNRRYRRFCRRIVKSQ  
AFYWGVIVLVFLNTVVLTSEHYKQPVWLDDEFQAIANLFFVVLFTMEMLVKMYSLGFQGYFVSLFNRFDSDVVCV  
ILEVILQYTNVFPPLGISVLRCARLLRVFKATRYWSSLRNLVASLLNSMRSIASLLLLLFLFVIFALLGMQLFG  
GKFNFPQGEKPRSNFDTFWPSLLTVFQILTGEDWNAVMDGIRAYDGVKFPGILVCLYFVVLVIVGNVILLNVFL  
AIAVDNLADAQSLTEIEEEEKEEEKERTRSLRRSKSRSPNKEQQEVGEEEGLDVNGNDSGEAGEKESNHLSRQPS  
RSRRSYRKESTQLNHHVRLDISPDHNMPGEYRNHSHKVPRLRDEDEDENNEESDEEEGTEGTETEEDDEEGEEDDEE  
EDEDETSSARPRRMSELHISSRVKPIPPFSSLFIFSATNKFRIICHKICNHSYFGNVVLACILISSAMLAEDP  
LRNESPRNQILNKFDYFFTSVFTIEIIKIITYGLMLHKGSFCRSLFSILDVAVVAVSLISFPLDNQAISVVKIL  
RVLRLVLRPLRAINRAKGLKHVVQCIVALRTIYNIMLVTFLLNFMFSVMGVQLFKGKFSMCTDESKLTEDECQGN  
FITYDDGKFNSPNIEERKWKKNDFNFDDVSNGLTLFTVSTFEGWPGLLYKSIDSHAEGKGPIONSKPAVAVFYF  
IFIIVIAFFMMNIFVGFVIVTFQNEGEQEYKNCELDKNQRKNCIEFALKVKPIRRIYIPKARWQYKIWWFVTSQAFE  
YGIFVLIMINTVALAMKYHGQSASYS DALDYLNIFTGVFTVEFVLKLAAFRFKNYFGDAWNVDFIIVLGSFID  
IIYAEVNPGKAFISINFFRLFRVMRLIKLLSRGEGIRTLTLLWTFIKSFQALPYVALLIIMLFFIYAVIGMQMFGRI  
KLDYNTQIHPNNNFQTFPHAVLVLFRSATGESWQEIMLACSDKTAVKCDPAVIEHGVNVTDAEANRCGNDFAYVY  
FISFYILCSFLIINLFVAVIMDNFDYLTRDWSILGPHHLDEFVRLWSEYDPEAKGRIKHLDVVTLRKRISPPLGF  
GKLCPHRVACKRLVSMNMPLNSDGTVMFNATLFAVVRTSLKIKTEGNIDTANEELRTVIKKIWKRTSPKLLDQVV  
PPAGRDDDVTGKFYATFLIQDYFRFRFKRKEQMVKISKGQEHTNALQAGLRAVHDLGPEIRRAISGNLDEEEMM  
DKEVEEPMHRRNHSLFGSVVSAMAGVRPILPFLNRTQSLKGTKGHNTSNLSPIIAVSTAATKMIGMNGNIGNAPS  
CNHLNLDLSNINHSIQQTHITVPNEDSRRPSKTSETKITIEPPEESFHDADDNIDEDEKFEDEVGDGNKEQEGEK  
VELDSVMTETSSHPQSVGDGPLPHTTIPNNPNASPSTKKGHIYVYRDLPQEDSDFEREQTPPTPPPRRLSRKGS  
FKLGCIGKQGS DENPLMRRPGRPLRLTGHHNNQGLTPPTLPDPDGSSQQRPGSQGSSGGRLFSFFRKLGRRPDRE  
PEESPVQHRHMDSSPAPDRSMHLHRSIGRGLIIPRAVQQQSLAPRQLENRRSSAETLVAKVLLDEGLNRYVDP  
QCLQREIAEATNMTQEEMNLAAREIIRRSRHLEPGYYENDPAGILSPDAGPRPRRSPSGHQHQHELLERSRYSTP  
SNNIDKHPSVN

>NP\_001023079.1|Caenorhabditis\_elegans\_CaV1

MSVLASMMSSGEDEEQAAADEQERTDLWQQTLQAAVAASSSQDATKKRPAQRKPLRQTNVVERSERSLLCLSLNN  
PIRKLCSISIVEWKPFEFILIFMICANCIALAIYQPYPAQDSYKNTLLETIEYVFIIVVFTIECVLKIVAMGMFMH  
PSAYLRNAWNILDFFIIVVIGLVSTILSKMSIQGFDVKALRAFRVLRPLRLVSGVPSLQVVLNAILRAMIPLLHIA  
LLVLFVILYAIIGLELFCGKLHSTCIDPATGQLAQKDPTPCGTDTEGSAFKCQPSDSLTMGVRWECSNTTWP  
GPNNGITNFDNFGLAMLTVFQCVSLEGWTDVMYVWVNDVAVGREWPWIYFVTLVILGSFFVLNLVLGVLSGEFSKER  
EKARARGLFQKFKREKQOLEEDLKGYLWITQAEDIEPVNEDEQEDEPVAQTVVGEAEDEEGEERVEDVRPSKWAA  
RMKRLEKLNRRRCRRACRRLVKSQTFYWLVI LLVLLNTLVLTSEHYGQSEWLDHFQTMANLFFVILFSMEMLLKMY  
SLGFTTYTTSQFNRFDCFVVISSILEFVLVYFDLMKPLGVSVLSARLLRIFKVTKYWTSLRNLVSSLLNSLRSI  
ISLLLLLFLFIVIFALLGMQVFGGKFNFNPPQPKPRANFDTFVQALLTVFQILTGEDWNTVMYHGIESFGGVGTL  
GVIVCIYYIVLFCGNYILLNVFLAIAVDNLDADSLTNAEKEEEEQQEIEGEDEEFEEGEDEGEEHGMDEPEGDE  
EMTSARPRRMSEVPAASTVKPIPKASSFLILSHTNSFRVFCNMVVNHSYFTNAVLFILVSSAMLAEDPLQANS  
TRNMILNYFDYFFTSVFTVEITLKVIVFGLVFKGSFCRNASLNDILVAVSLTSFVLRDAMSVVKILRVLRV  
LRPLRAINRAKGLKHVVQCVIVAVKTIGNIMLVTFMLQFMFAIGVQLFKGTFFLCNDLSKMTAEACRGEYIHYE  
DGDPTKPVSKKRVSNNDFNFDNVGDAMISLFFVSTFEGWPQLLYVAIDSNEEDKGIHNSRQAVALLFFIAFIV  
IAFFMMNIFVGFVIVTFQNEGEREYENCELDKNQRKIEFALKAKPHRRYIPRNLQYRVWWFVTSRAFEYVIFL  
IIVMNTVSLACKHYPSRGEFEDFLDVFNLI FTGVFAFEAVLKIVALNPKNYISDRWNVFDLLVVVGSFIDITYGK  
LNPGGTNLISINFFRLFRVMRLVKLLSRGEGIRTLTTFMKSQALPYVALLIVLFFIYAVIGMQFFGKVALDD  
STSIHRNNNFHSFPAAILVLFRSATGEAWQDIMLSCSDREDVRCDPMSDDYHKGLNESRCGNNFAYPYFISFFM  
LCSFLVINLFAVIMDNFDYLTRDWSILGPHHLEEFVRLWSEYDPDAKGRIKHLDVVTLLRKISPPLGFGKLCPH  
RLACKRLVSMNPLNSDGTVCFNATLFAVVRTNLKIYTEGNI DEANEQLRSAIKRIWKRTHKDLLDEVVPPAGKE  
DDVTVGKFYATFLIQDYFRRFKRRKEMEAKGVLPQTPQAMALQAGLRTLHEIGPELKRAISGNLETFDNFDEPE  
PQHRRPHSLFNNLVHRLSGAGSKSPTHEHERIEKGSTLLPFQPRFSPTHSLAGAEGSPVPSQMHRGAPINQSINL  
PPVNGSARRLPALPPYANHIDETDDGPRYRDTGDRAGYDQSSRMVVANRNL PVDPEEEEQWMRSGGSPNRSRR  
NPHLREPMLVARGAALALAGMSSEAYEGTYRPGEGKSVRLPFSSRPVLRPAEDSRPVDRILIGQSLGLGRYADAR  
IVGAARREIEEAYSLGEQEIDLAADSLAPLMQHVGMHDIRDINENSR SALLRPAENSSRQHDSRGGSQEDLLLVTT  
TL

>AEJ87267.1|Dugesia\_japonica\_CaV1A

MTSTGSTLYTTS AQNPWKSASGGGAASFGTGNRPFIADLALAAKLDREGAKRRQLCTSFKPDRSLFCLKKNVLR  
VFIARIVDSKPFELILFTIFANCVVLGMNRPYPNNSNSTNKILEKLELVFVI IFTFESLLKII SYGFILHPNS  
YLRNAWNILDFFIIVLIGLVTEFLAWTSVEAKVDIKSLRAFRVLRPLRLVSGLPSLQIVLNSIITAMKPLFHIAL  
VFFLVVIYSIIGMELFMGKLHATCYNNTVNEIMEDPKPCMVGVVDEGYTCSGIGSLDDGQSWVCREYNASERWVG  
PNDGITNFDNFGLAMLTVFQAMTMEGWTQVMYWINDAQGNKWPWIYFVSLI LLGSFFVLNLILGVLSGEFSKEKE  
KIDRKELFQKERELKRQQDYIGYKEWIEKADELSDEENDGNSDDYREINASLDHNQNAEAAIEEIAKSRCHKLL  
KRFRKTRNRWRRSVI IYMKSKQFFILILSLVFLNTLVLTTEHHKQPIWLDRFQDIANIVFVALFTFEMVIKILAL  
GLGEYFSKAFNKFDFFVVLCSIIELSLTRPKI INPIGLSVLRCARLLRVFKLTQYWNLSRSLVEKLLKSMKSIFS  
LLLLMGLFIVIFALLGMQMFGGKYNLEKKSRSNFDHFQWSIITVFQILTGEDWNEEMYNGIRSFGGVKGLGALVS  
LYFVVLFIVGNYILLNVFLAIAVDNLSDDDEEEEGNDAKSKNNNKSEDNAEMVDNQDAVSKDEKLPNGSVGDN  
NCINNSNTGALS KMERIRMHFESDNTQDKRTYEEIYAEEEEFNDDDLKRGASACPRRNDLENMKTESQTIIPPY  
SAFFIFSDTNKFRVFNHVVCHSYFGNIVLVCILVSSVMLAAEDPIRTSSRRNKILNYFDYIFTTVFTIEITLKM  
IAYGFLHPGAFRCRNTFNLLDLLVVVVALVVSFTIENEASAVKILRVLRVLRPLRAINRAKGLKHVVQCVVAVK  
SIGKIMLVTFLLVFMFAVMAVQLFKGRFYSDTNSKLTNDTCKGQFINYKGLRGNIPTVENRTWENNALNYDNVL  
SGMLTLFVVATFEGWPGLLYKSIDAYKEDFGPVYNYNQVAIFYVTYII IIAFFMINIFVGFVIVTFQKEGESEY  
KNCELSKNQRKIEFALKARPRKRYTPQGHLYKIWSMVCSKFEYVILSLILANTICLAARFDQPKPYTETLD  
ILNIIFTVVFTLEFILKLSAFSFKNYFSDAWNIFDFIVVLGSYVDII ISKANTNSSPQVGKTKFISINFFRLFRV  
MRLVKLLSKEDSIRKLLWTFIKSFQALPYVALLIVMLFFIYAVIGMQMFGKIALNNSDSAISRNNNFQTFPAAVL  
VLFRSATGESWQEIMLSCTGTDEKSHCEPGTNEHGLCGSWVAYPYFISFYMICSFLIINLFAVIMDNFDYLTRD  
WSILGPHHLEDEFITRWADYDIEAKGRIKHLDVVTMLGKISPPLGFGNMCPHTRACHKLVRNMPLQSDGTVLFNA  
TLFALVRRNLKIKIPADDDKKSMDQWNEELRAVIKKVWKRTSPQLLDQIIPPKSDTIVTVGKFYATFLIQNWFRD

WQRRKMIQRDIRYIPQITAGDRSMQGPPLILGLPRRTSSELIGDEFKVKKKGIQNDDKETKKDLSISTKRLITPP  
SNQAI SNPVLQSTIPNGGIQFQKSVQKSDPKINENKPNTRPHSEKIDFKYGDLVGDDPHSNTGLMSMLPRSVRIS  
STAMGMSANHEIKTPIVFMQHQALAMAGMPIKPETTNYYRKSYPVEDPTNEHSRGLGSPVSYSEDEVKMAEMF  
AAARKE SLKPN I

>AEJ87268.1|Dugesia\_japonica\_CaV1B

MLNDRIYPNNLTGGRSGIDHCHPTQYSAPMHQYRQLYADRPYYDTHNRNTEYKCVENDYLETGYRYDTRNNYQLN  
YSPPGQFDEEEEDDDRNYFDNEERVHEYS DGDGDYGNKNQKRPLVSQPAKINIDEIPQLQISCEQNEPHDVKFD  
MNNNSVIKVVDDQSVSSNNI IKSQNDKTPCAKT VATNPPAI YSGFGGLGSGLGGGGLGGI LGVAAAAAQQQGRPL  
NLAALTL SAQIASGGRKRAPARSQSGNPRPKRALFCLTLRNPFKFCIGIVEWKPFYEYL ILLTIFANCFALAANT  
PYPERDSNMVNSALEKIELVFIVIFTTECVLKILAFGFIMHPGAYLRNGWNLLDFLIVI IGLISTVLSKMSEGGP  
DVKALRAFRVLRPLRLVSGLP SLQVVMNSIMRAMVPLFHIAL LALFVII IYAI IGLELFSGKLHSTCYKQELVM  
ENPVPCSTSI SKGYQCDDFHL SGLKYSCKDFKNVSSIRWEGPNMGIT SFDNFG LAMLT V FQCITMEGWTQIMYWI  
NDSVGM SWPWI YFVSLII IGSFFVMNLV LGVLSGEFSKERL KAKKRGKYQKAREQM QFEEDVQGYLDWIGAAEDI  
SDEEDNEGKENGKESRFKLCGLCKSSGKSDDGDDQLSDKMDLETEGGGHSQQQQYVFCFPLKSRGRKWNRRCR  
RIFRRLVKSQAFYVWVIVLVFLNTGVL TSEHYRQSLWLD SFQDTANI IFVVLFTLEMLIKMYSLGMRCYDFDMFN  
RFDFVVI IFSIGEIVMIQTKLMPPLGVSVLRCARLLRVFKVTRYWSSLRNLVGSLLASMKSIVSLLVLLFLFIVI  
FALLGMQLFGGKFNFEKKGKPRSNFDSFWQSLLT V FQILTGEDWNEVMYDGIRSYNLGRSAML SCLYYVILFIC  
GNYILLNVFLAIAVDNLADTGSGNKEEKEGENEEEEEGNNAENEKVKCTSNVSPNLDEKNRFTDAERLIKSEE  
MNGDIGEDSMRKMSTRGDKEIDNEEYEGEGEEDENQASAIRRVSEVMAKEKIKPIPNASSFFIFGPNNRFRK  
FCHFICNHPHFGNIVLVCIMVSSAMLAEDPLDAESPRNKILNYFDYLF TSVFTVEITLKVITYGLVFHNGAFCR  
SSNNILDLLVLT SII SYPINND AISVVKILRVLRLVLRPLRAINRAKGLKRVVQCVVAVKSIGNIMLVTF LLEF  
MFAVIGVQLFNGKFQSCNDLSKSTFNVCKGHF ILYNEADIAKAVVNKREW TNNPLNFDNVPNAMLT LFAVSTFEG  
WGLLYKSIDSFKEDYSGTYNRPVVSIFYIAYI I VIAFFMINI FVGFVIVTFQ QEGEEYKNCELDKNQRKIE  
FALKAKPVRRYIPKQSF RYRVWLLITSRPF EYII FVLIMLNTISLALKFDNQLQY EKVM DYLN MVFTGVFTVEF  
VLKLAAFGFKNYFS DAWN VDFI I VLG SFIDI IYDHVNVTSNSPHRGDKLISINFFRLFRVMRLVKLLSRGEGIR  
TLLWTFVKS FQALPYVALLIVMLFFIYAVIGMQMFGKIT TENEKEFREINRNNNFQTFPQAILV LFRSATGEAWQ  
NIMLHCLPDAVCDAYS DQIRKEYINVTLTGKGLDSRNNLTESMITWPPNVSKYKINKYISQH QDIAKCGSNFAYP  
YFISFYMICSFLI INLFVAVIMDNFDYLTRDWSILGPHHLDEFVRLWSEYDPEAKGRIKHLDVVTL LRKINPPLG  
FGKYCPHRTACVTLVRMNMPLNSDGTVMFNATL FALVRTNLKIKTDGSTVDQLNEELRVVIKKIWKRTSQKMLDQ  
VPPAGNDDVTVGKFYATFLIQEFWRWKQKRNEEQKGMTYSQNKRLSLMPFRTHGRAGSGPLHSLISPTLVTTN  
ECDEKDKDYLP AHLGAERRTHSIFGTMMNVLQRVGSTRRDSNASPSTG SINQSNESHRRDSNSRPMILS QSKSPT  
NHPPVKLTLAPVIEGQVISNDEYSTEIPPKI PKTVSKQSLNYDKKIPTNKQSKTEYPIREKVS HRPNPLDIDLPL  
HRSNVFP RPSRSQSSESPESIQRKEEKVVS PVYSSGYSDEEDRISTESLIYVRRKSKDRYKQSSHYRISAVHPS  
NIDSRKYTNKGRPSMSHNEYYKGS PNDYSGQSSGESSELQYYPKNI PSNRCSNVQIIDLDISLSSSPDNEEY E  
YGAEDEAFIYPLSRGDT P SPAPPPPTAHQRYQSSSRTSSSLGQCLGRQSSRESLIDRGLVQPILFAQNQAVLLA  
GIGDCKQFVNTSLRRRLPDTPQFP SAKENVPFNPYEKSIANQLRNIRQSKI VNLPKRKYHQEMIDNSRYVNASN  
ESNSPENI PQGAFDLEWRD SPPTPAPNNNIRYSRQRIDQEPLRAEPQKNMHRYDS PRQSERS SYMMRHQCSLE  
EEPIESTDDYEEEIDQSKAPNQYEQDYNRYMMKYASSNPRSHYMVPRNCYIDPRMSRNPMPDLISSTDWLLDKCQ  
NIPVLANRMFQQKNYKYPQQ L TEETF SRARM DANSPPPEPAPRQELPTQYVLSQQRESDEIDYMQMSEENIDKS  
FKTLRTHSKQYSDMGSQTNLEMTEPLLKQSIPNHLLSKSINPVFSPPIRPPYEHLLGGYGLHELKDSNVWSMRDE  
NMSPVVNRGPIKSMRHPTKTSITRFDK

>XP\_032219777.1|Nematostella\_vectensis\_CaV1

MDSNVYSREQPSAPMKSSWPTAAELAQNRAKLNQPKYKPPPQPKRQKKPTNAVRPKRALFCLTLGNPIRSTAI  
SLVEWRPFDMILITIFANCAALAAFQPLPEQDSSLINEELEVAEFVFLGIF TMESVLKIIAYGFVMHPGAYLRN  
GWNILDFVIVVGLATIIVKLYTPDSFDVKALRAFRVLRPLRLVSGVPSLQVVLNSIIKALIPFHIALLVFV  
IIYAIIGVELFMGKLHSTCYDNVTGQPTFDEPHPCSTESEGYSCSNAGPGQVCLKKWEGPNYGITNFDNIGLACL  
TVFQCITLEGWTDVMYSINDAIGNSWPWLYFVTLIIWGSFFVNLV LGVLSGEFAKEKARAQKSGEFQKLREKQL

VDDAYHGYLDWISQAEDIEGDSSAGEDEEGKADRKPSFRRRKENDDISKNKENQEDSAASDQGWIDRKKKILKRF  
HHRLRRSCRKAVKTQWFYWTVIVFVFLNSLTLALEHYNQPEFLTQFLDKANKLFLALFTLEMVVKMYCLGFHGYF  
ASLFNRFDCLVVISSLLELGLTEAMDQRPIGISMLRCVRLLRIFKVTRYWSSLSNLVASLLNSMRSIMGLLLLLLS  
LFMVIFSLLMQIFGGKFNLDGEDVPRSNFDSFWRALVTVFQILTGEDWNAVMYTGIQSWGGITESLSAIPILYF  
IFLVVVGNYILLNVFLAIAVDNLADAESLTEMEEKKKERELEELEMKLRMEEKESSNKDLENKRASSTSSGAGKT  
TSQDLHSNGNSIPRALSSDAESPPLAEDSKATLNREGDHESVRSATSTEVMDHEPMPPESSLFIFSNTNCFRVVC  
HRIATNSYFVNFILLIIVSSCMLAAEDPLNSNSKRNQVLNYFDYFFTAVFTIEITIKI IAYGVILHKGSFCRSA  
FNLLDFLVVAVSIVSIALRDSSSQISVVRILRVLRLRPLRAINRAKGLKHVVQCVFVAVKTIIGNIMLVTVLFNF  
LFAVIGVQLFKGTFFSCTDAEKITKRECQGYIEFKGPGLTNPVVKDREWQPQTFNFNDVPQAMLTLFTVMTFEG  
WPGILESSMDSTDVDEGPFLNRPWVAIYYVIYIIIIAFFMINIFVGFVIVTFQNEGEEEFKDCELDKNQRKQVE  
FALKARPTRRYIPTNRLQFHVVRVVTSPFFEYLI FAFITGNTILLMMQYYNEPKLYTRVLDGFNIGFTSVFLEEC  
ILKLFAFKPKNYFLDRWNLFDFVVGVSVDITMNEVSPDRYGGMAIGGPKRDEGYARKARLHKVSEQMFAFGFF  
RLFRALRLVKLLNQSGIKTLLWTFIKSFQALPYVGLLIIMTFFIYAVVGMQMFGRIAIDPETQINRNNNFQTFP  
QSLMVLFRSATGENWQLIMLACTDTPNAKCDPNAYPQDTDGLCGTDFAYAYFCSFYAICSFILINLFFAVIMDNF  
DYLTRDWSILGPHHLDEFVRVWSEYDPEASGCVKHVDIVTVLKRIAPPLGFGKFCPHREACKRLVSMNMPNLRDG  
TVNFNATLFLGLVRTSLSIKRPEGKGSLEKANEEMRAIMKVWPKTSQEFLEIIQPPGGDDEVTVGKFYATYLIQ  
EYFRRFKARQRAENAQYQDAHSTQALQAGLRTLHGLGQLRRAISGHLDDDEELFLKEDIQQKSQDLDFLSEQHK  
RFWESLKNVTPSPRHSRPSLRPGSIRLSAFIKKGNSTPEAQRKSSLPATLTVPSFSHGPLLTSDRQLLVPPQ  
QSDVNANDKESKQSAHVPSKPLKGARSFPLPIMANGDLKEPALDTRERSKSEILERPASGEAVLEPTELDKEKS  
SSAQNIVEQALQDEELDEDDTIVRVVEQEIAEAFDLSTDQLNDAAERLLSELEETLKNEEEVEKEEARLEAEAQA  
DKSEEGKDNFWKKGLQPSPDSCIVITDL

>AAC63050.1|Cyanea\_capillata\_CaV1

MFDVQVKQSDGETERQGWESRPSSEDDDDSI PFENSSPQYDWDNDLTS GKDQDDEKNLALLATQKMATSTYPTK  
KTKKQPGAGQNLRPKRALFCLTLDNPVRSAAITIVDWKPFDFILASIFANCAALAAEYPLPAGDMTSTNQDLEV  
AEYFFLAVFAIEGLLKI IAYGFILHPGAYLRNGWNILDFSIVVIGFASMI FEEYLKSGFDVKALRAFRVLRPLRL  
VSGVPSLQVVMNSIVKAMPLPFHIALLVFVIIYAIIGVELFTGKLHQTCYDNITNLPASSEPKPCSTTTSYGR  
QCPSGSICKNNWEGPNYGITNFDNVALAALTVFQCTTLEGWTDVLYDINNVS GGGWPWIYFVTLITFGSFFVLNL  
ILGVLSGEFAKEKARQTKSGEFHKIREKHMDDAVKGYLDWINQASDIENVTVTQEGAVEPGDSTSERKLSSRRA  
SGISHASSGIYNIAAPNPLTTKERIEKNLTKFHRLRRQCRGIVKSQTFYWMVI IAVFLNSLVLAVEHYDQPDYI  
TMFLDRANYFFLGLFTFEMLLKIYCLGIYGYLNSLNFDRFCLVLSLLEVAITVPTGWPPIGISVLRVRLRLRI  
FKVTRYWESLSNLVQSLVNSIKSIGSLLLLLLSFILIFSLLMQIFGGRFNLDEQAPPRTNFDSEFWRSITVFI  
LTGEDWNAVMYVGIQSWGGIKNPSSI IAIYFVALVIVGNYILLNVFLAIAVDNLADAENMTKVNEEEKRKKKDA  
KLMKKLARKKMDSLDSAEGKETTESI TDGSKDPLSGSEGEDVELGNPKSKNGTLRHMGETTSTEMSEGKEARI  
RPLRLSELNLLKDI PDPMPPESSFFIFSANNKRLRYLCYRLAVNKIFINSILVLIIMSSVALAAEDPIGRDVLNKK  
ILGYFDIFFTAMFTFEVTVKMIAFGVILHKRSFCRSFFNQDLVIVAVSWAAIMLSRGSATSVVRILRVLRLRP  
LRRAINRAKGLKHVVQCVFLAIAKSGNIMIVTLLFQFLFAVIGIQLFKGTFFYCTDRSKMTAECKGTFNSEYEVN  
LANPVVAARTWEKHTFRFDNVFQAYLSLFFVMTFEGWPSILEHSIDSTTVNQGPKFNRRPFVAIYYVIYIIIIAF  
FMINIFVGFVIVTFQNEGEEEFADCELDKNQRKQVEYVLTVKPTYRFVPRKRFQYHIWRVVT SRLFEYMI FGFIL  
GNTIVLAAQYHNASKLYERVLDGFNIGFTAVFLLECVLKLMAFNKNYFRDPWNI FDFVIVVGSIA DIIIGEISK  
DGGIKVNFRLFRALRLVKLLSQDGI RTLLWTFMKS FQALPFVGLLILLFFIYAVIGMQVFGTIRLDSGTVIN  
SNNNFQTFPQALIVLFRSATGENWQQIMMACVNSESVKCEVDP SKTCGTDFA YLYFMSFYMICSFILINLFFAVI  
MDFDYLTRDWSILGAHLEEYVRIWAEYDPEASGRMKHVDIVSMLKRIEPLGFGKCCPHREACKRLVSMNMMM  
NNDGTVDHFATL FALVRTSLNIKKPDATETILHANNELRGI LKHLWPTNENLFDKLI PPPDYAEGITVGKFYAT  
FLIQEYFRKFKKKRQEERKKKNADSTVALKAGLRTLQELGPKIKRAISGDLMEEGTKEEEEEKEKEPNKRHSFMAG  
LRKGI ISSFAGDKRNSYYNALQDTPKQTPKQTP TSSVSHLAAPNTQGKRISLPSLQTKTNSQDNIPRGALHEG  
PSIMQRLSPRLKRKGQRPKSTPFEI IHHDSDDLALPQIVLSSQSDVSNPSSKDRDNRSSSTPQHASSIPGADLNS  
NLLDSNLGPRRSRSTSSSLVGQALAHGVPQDEAILRTVQKELSDSLNISESQLEGAARNIYDFEKESGTSIP  
PPEAAPPQEQPNAEQLSPYNDNNDNRSSRPDRTSYL

>evg1032956|Trichoplax\_adhaerens\_Cav1

MADDKVGTDDGKSTLDLSDIRDLRPPSVAGTLLETAAIARAKRRGAIQGRIQHYKAKQGALTPRAARVLFFLKT  
NPIRQFATTVVEKKAFFEYLILFTIFANCVLALYQPLPNDNTLLNENMEKVEYVFLAIFTIESFLKIIITYGFAI  
PSGAYLRNGWNILDFIIVIVGINIFTATSSSNQNIIDVLRALRAFRVLRPLRLVSGVPSLQVVMNAIMKAMVPL  
FHVAALVVFVIIIIYATIGLELFGVLRACYNITKKLINDRPRCAASESFESAHHCKSGYVCLRNWTGPNAGIT  
SFDNIGLSMLTVFQCITMEGWTNIMYSINDAVGSEWPWIYFVTLIIILGSFFVLNLVGLVLSGEFSKEREKARVSG  
DFKKLREKRQIEEDYRGYLEWIGKAEDLEVDVDDLQVDMEQQVAAEGVRFDDVEHGSQGSAAVEEKVYCFRFRHQ  
LKRWHKRSRRYCRLLVKSQTFYWLVLAVLLNTICLAVEHYEQQRVVTQFLSITNSVFVGLFTIEMSIKMYALGI  
EGYFMSLNFNRDFLVLVLSIIELIFIAIIGGAAALGLSVLRVLRLLRIFKITRYWNTLRNLVASLLNSMRSIASL  
LLLLFLFVLIIFALLGMQIFGGRFNFNKSI PRSNFDSFWQSLTTFVQIILTGEDWNEIMYNGIKALDGDIDRFGILAV  
FYFIILVVVGNVYILLNVFLAIAVDNLANAESLTEINERRNAKRKMAKEQRLQKLQTPVQSLRYGNISIGSAVENV  
SSEENPDDIQKLSKVMYEGDLENDFSNPVYKMAVFSETESELSRVEELDSNSDCTEEPARPRLDASFRNTTQIN  
WKKIPDRVIVPIPKATSMFLFKSTNRFRCCKIFDFVTNLYFSNIIILIIIISSITLAAEDPLGKDKIRNQVLSYCD  
KTFTAIFCVEAAMKMIAFGVMHEGSYFRNIFNILDIVIAVSIADYTI AENLQKLVLRVLRVLRPLRALNRA  
RGLKHVVQCVFVAIKTIWSIMLVTLVFMFAVIGVQLFKGRFYFCTDASKMDNSTCKGSYNYPTGDLNLYQVE  
PRIWKESFNFDNVPNAMMTLFTITTFEGWPSILYRAIDATEAGRGP SRNHQPLVAIYFVIYIIIVAFFMVNIFV  
GFVIVTFQTEGEQEYRNCDDLKNQRNCIEFALKTKPKRYIPKKNLQ LAVWKLATSLGFYEYTI FGLITLNTMTLM  
MQVYRPSRVYNDVLEYLNI GFTVLFGLEAILKIVAFKPNYFRDKWNVDFVIVVGSIIIDIVISEIYKSSNVTV  
DFSVNFFRLLFRAMRLVKLLSRGGMRLLWTFMKSFOALPYVGLLIVFVFFIYAVIGMQLFGTVLTS PGSAITEY  
NNFHSFFSSVLVLFRCATGENWQLITLCTWRTGNGCSENSCGSNISYLYFSSFYVLSSFLVINLFAVIMDNFD  
YLTRDISILGPHHLDEFVQAWSFFDPEATGRIKFDMMVKLLRRISPPLGLGKLCPDSTAYRNLMGMHMLPGLTDNN  
VKFNATIFALVRKQLKIKLDGNLDRDRELNI IKRIWPRTPNKLLDEIVPLSLKDNDITIAKIYALLIRNFIR  
RRRERQAKQRREQTSNEIQVGIRVLQDLGQTNLRRASGELRSDDDDEEEDIKTHAKSQFTLRFTFNQSLYRFGSSL  
KINSSSDLASQKSSSIDSIKNKYCKAPIVYSSQNTHFSEAETPNSVDNRYEVSTSKDMRHETSQQNKRLQLQFT  
DSKEGTSRLNEGLRNADIPDSGYTKDKDGGIVNKLYGIDITNTGSSGNGSGVIDSGSMPYGPYGDTLKTKVSDRI  
NRSTLTGKIHYRKSSFERVSVV

>evg1041627|Trichoplax\_adhaerens\_Cav2

MASSSFNSVTLKTNLSETVRHLVHEKIAANNANKQOGIIRAYFRRIWQYDRDKSLCCLPANNLLRKYAKKLVD  
WTPFEYLVILTIVANCVLAMDVPLPDNDSTEISLLLERNAEIGFLVVFCIEAALKIIAKGFFFHPQAYLRSGWN  
ILDFLIVVVGVLNFAFYINAASNEIDVKILRVVRVLRPLKLVSGMPSLQIVLRSLLTAMGPLFQISLLVLFVIVII  
SIIIGMEFFLGKFHLGCRDPRTGQLLTQNHMSPCANNQPNSSAGFRVCVINTTQYQVFGTCDYKYDGPNYGITGFDNI  
FMALLTVFQCISLEGWTLNLYDTNNAVGSTFTWFYFLTLIIWGSFFMLNLVGLVLSGEFAKERDRVEKRREYKKF  
QENRKIERDFLGYLEWIGRAEDLILGEQRLKEEETAPHFDTRSEIFQFAEQDQVAELAEITLSENPIINTKAYATT  
THSPRANCLHMVQRSEKFLRLAIRRTVKSRRPFFWIVILLVFLNAVTIASEHSGEPLWLKDFREATNIVFVALFTL  
ELIILKLYGLGAVFYFSSTFNCFDFAGVIASIAELKVRNVGGPKLGIRGFPCIRLLRIFEITKHWKLSNLVASLI  
SSLRSILSLLFLIGLCIMVFALLGMQLFGGRFNFAEGVPRSNFNDFGHAVLSVFQVLSGEDWNEVMYNGIRAYRS  
SGEFVSYAVSLYFVVLVCLGNVYLLNVFLAIAVDNLTKAQEISKDEDEEIMLQKRLSIKRNYSKDSGCQSALGD  
GOYGTDDRPRESI RTLSIASTDGRSNQRSRRSTLRIPMPSSPSINDDNAFPEFCDNNTSQQETRI DEINDIENPG  
NENDDEEPNFRQKRLGSTKMNFQDAHQEPELIGKEIFAQNPVILQVNSLFI FSPQNRFRFCHYIVHLRHFENF  
MIAAIIISSGLLAVEDPMNEDPVLNYVLRIFDSIFTGIFLIELILKVVDFGFILHRGSYCRNLWNILDMI VVTA  
VTSFIYFEIGVENQSNRNISAIKAI RTLRVLRPLKAI RTAKLLACFQCMVNSLKNVNLVNCIVMLLFLFMFAVIG  
VQLFKGKFHYCTDQTKHTKSQCRGNYHYTDGHVYNVEVLERRWEQHPYNFDDLPRAMTLFTMSTAEGWPRILY  
WSIDATNENEGPMRDYNLAVALYFCIYIVVFPFFFINIFVALIIVTFQEEGDKDIANYQLNRNQRDCIEFALNAK  
PIHRHMPKDKKSAYYKVVRI VTSPTFEFIIMVLIIVNTIVLMMEYNGQSKDYKDMLQIINIIVTILFTVEMLLKV  
IAFSPRNFIKEWNIIFDLIVVIGSWTDIIITYASINGTSTVSI SFFRLFRAGRLIKLLRKYGTIRVLLWTF LKSF  
QALPYVGLLIGMLFFISAVLGMQLFGQIQSDPTTAIFRYNNFQFTGALIVLVRVRCSTGENWPEVMLACL PGRAKC  
STKFPDCGSYVAYPYFVIFVFLSTFLMLNLFVAVIMDNFKYLTRDKSILGPYHLHDHFLHTWAEFDPEASGR IKHQ  
ELCTMLCRI PPLGFGSSCPMRTAYRRLMKLGIPINGDNTIRFKATL FALIRTS LKIKVREDQHEADAE LCQIIR

KIWPQVTSRTLERILPQVEHGARHLTIGKIYAALIIYEYKRYKKQQLREEDEQVRMRTKSLFHRFIDVVRTPIR  
TGAHKDLEIPTEYPTKQLRSKHFHSHSFKIPRPSLRRSRKRDKMKSCHAVSAKPSDSSVSGENNRSRSLPGLIFE  
SIDDNAGKVQDINLYLANRSSKETDFCIAEVHHEDEGYLQSEYRNNTDERSQTLDPLLSNRRQGSRFNIYNTSG  
SNLQPSPLTFEPGRPLHRMIRTTPIGTGPKSPQKISIVQSTYNSANNSPTTIH DRYHSGSANNSSNNINGGSYSPTR  
NQHQFKLKLQHEDSNDSCTGSLGLRLQKSGSSCGSTDDDLNDLNDAIQFNNLQDLLPVDIPDVTISISDSDPYGSTD  
GLDKQYASDLNGATEYKRLPSNAFWSVQRNYNKVLSKSSNNSLNNCNGASNLSQDYSNNHTNSTGNNASSRGTN  
NLHHQRHFSNNHNSTLNHSGHQSDYYKNDYNGIRNDDYDELELNRNLMLSNFSFNSSDDL TNISKCTAV

>evg954676|Trichoplax\_adhaerens\_Cav3

MLKVDMSNNGHRCHQRFAASSSYQSDQPSHHAIDRNKHQDLPYHGKAKSPDLLSPI SAYDRYQQGRQQDGTNQN  
YKADNYRQPHDI IREFQSEQQINSNDADI EEEIHPVVCWYLHKDQWPRKYFVKLSQWRWFERITIIIVILINCVT  
LGSYNPAGQFKNNTCVDSTCQITSVVDNII FGYFV VEMI IKMVALGVFGKYAYFSSGWNRLDFIIVLTGCLEYLI  
NEGEFLTII RTVRLRPLRAINRVPSMRLLVNLLLDLTPLLGNVLM LCFIVFSIFGIVGVQLWKGILRSRCTLQO  
NITAPPGIFLYRYLPSYEDPDYVCSLPEYNGIHHCRDLTSLNLTLDLTCKITNQTLASQYGDGTCTEYLFYDT  
CSTSGPNIFYDNISFDNFAMAFIAIFQVITLEAVDIMYAIQDGHASIDWIFYVILILIGSLFLLNFTLVVMATQ  
FSETKRRVTKKARNSPSAIRSRRGSFSTLSSSAESRTCYNETIRLIRRI ILYIAYLIQQFYSRCLKKIWNRLYNR  
CLTCKRKWSSRHQRSTSMSES RVNGNAKFTSDDQRLDRLHQNFLLPDI DGSCLSDGTERSTYLA FRLDNWRQRSY  
SQNTTTTSQIYQESALRDRLGKRNGDLAINNSLYDGTDDNDGDTPIHPLESNTELOLFNFQLRHQPDGVS LTTDL  
SNKPTNYQKLRIRRLRVRCCIFTKSQKFSLIVLFAILANTIVMAIEHHNQPTYQIQALEVCNII FTIFFTLEM  
VFKLFALGLLRYAKDSFNVD AIIVIVSLVEIATDGKGLSVLRSFRLLRIFKIVRFLPTLQRQMMVMAQTFDNVV  
IFLGLLFLFMFTFSILGMHLFGNRFCLARVKDGPVVC SRKNFDSLLWAFVTVFQILTQEDWNVVMYDGMLARGKW  
AAIYFLALVTLGNVLLNLLVAI LVNGFQEQEKDEKNRKDLTAKMGRALKHYCDSITDVRSEDQ PANRQVNAPD  
ENSGYQVGKDLQGIPTTQIVEGYGKSTPICDHQSCAMESSALNQS NKREEDGDSQTEFYIRTFQSSSLSCNHNQ  
EEEQQQLPNLVDPNEVQIFPCRVP IGPDRPPQSKNKFAKLRRLMPWKSQKWQAIRRKYWICPEEVNPNWLTRH  
RNHSLILPKENRFRKWCKNVVKNPYFDRI ILVVIIFNCVTLAMERPGIDPNSMERHFLNLMVII FTFTI FTSEMI  
IKVLALGLVTGDKSYLRNGWNVLDLLLVII SWVDLIITYTGGASNILGVLRI LRGFRTLRLRPLVINRAPGLKLVV  
QTLFSSLKAIGNIVII CVAFFVIFGILGVQLFSGKFY YCKATDDVENKTQCVEQYGLSEWVNRPNYFDDLVNASL  
SLFVISSKDGWMDITYHGIDARGVDLQPKKNHNVVLLYFISFLLL VGFFVLMFMFVGVVVENFHKCQEEHERRQR  
EKRRNRKLQRAKKNQNKANAKKVI IKKKVKEKKKNI PPVEDYPAWRRKLYRFCVHRYFDITITIVIAVNI IFMA  
TEHYKMSQAWEEVHKYANYFFT VVFTLEAVIHLVAFGVVYFRDRWNI FDLLIVILSWTGII IESQVLSNPTINP  
TIIRVMRLLRIVRILKLIKAAK GIRALLRTIMNAMPQVNLGMLFLLFFIFAALGIELFGRLDCTTDNPNGLS  
QHANKFTFGMAMLTFR IATGDNWQGILQDTLRENCDRSENCQQNCCSNPILSSLFFVIFVLA AQYVLTNVVAV  
LMKHLEESDEKENNDLDPGSSSAKESQGLDDGMTESNNYPPGLTDIHLSSNHKNL DKIGEDYTHHQFDQNHTLK  
SPLPYQNKYARITVSRSITAI VPQKSVLDQAENEVVMQDKFQVHDIRTKLSYPLDDHDDVEDQMELTASIH CENR  
KLHRQGQNSDDGHPYLQQHSPLFRHQSYESNCHGSIQSDFNFSNLSSDTSSFS ENPLKSNNSKDNPTRDRIYT  
ADDLNRILSKKRKSLKRSNSWDFSFTSEFSNHRRYPCSKKKT IYPFHYPSTKLSKDDSTISDQPMVVI AKEKKVT  
LPRKMIQTLV

>trinity\_TR14113\_c2\_g1\_i5\_m.26708|Hoilungia\_hongkongensis\_CaV1

MADDKMGIDDGKSTLDPSDIRDLPPSVAGT LLETA AIAKAKRRGAIQGR IHYKAKQGALT PRAARVLFIFKTD  
NPIRQFATTVVEKKAFEYLILFTIFANCVALALYQPLPNNDNTLLNENMEKVEYVFLAIFAIESILKIMTYGFAI  
PAGAYLRNGWNILDFIIVIVGI INIIFSATSSSNQNI DVLRALRAFRVLRPLRLVSGVPSLQVVMNAIMKAMVPL  
FHVAALVVFV I IYATIGLELFGVMHRACYHNVTRKLI NDPRPCAASKSVESAHHCKPGYICLSNWTGPNAGIT  
SFDNIGLSMLTVFQCITMEGWTNIMYYINDAVGSEWPWIYFVTLI ILGSSFFVLNLV LGVLSGFEFSKERERVRANG  
DFKKLREKRQIEEDYRGYLEWIGKAEDLEVDVDDLQADMEQQVTA EGLRFEDVEHGSQGS AVEEKKIYCFRFRHQ  
VKRWHKRSRRYCR LVVKSQTFYWLVI LAVLLNTICLAVEHYEQTVVMTMFLSITNSV FVGLFTIEMSIKMYALGI  
EGYFMSLFRNFDFLVVLSI IELIFIAIIGGAAALGLSVLRVRLLRIFKITRYWNTLRNLVASLLNSMRSIASL  
LLLLFLFVLI FALLGMQIFGGRFNFNKSI PRSNFDSFWQSLTTFVQILTGEDWNEIMYNGIKALDGDIDKFGILAV  
FYFIILVVVGN YILLNVFLAIAVDNLANAESL TEINERRNAKRKMAKEQRLQKLQTPVQSLRYGNIGIGSAIENV

SSEENSDDIQKLSKVMYEGDLENDFSNPVYKMAVFNESEAEISHTEELESSESDYIEEPAKPRLDASFRGTQIN  
WKKIPDRVVVPIPKATSMFI FTSTNRFRCCKIFEVVTNLYFSNIILIIILSSITLAAEDPLGYDKTRNQVLSICD  
KTFTAIFCVEAAMKMIAFGVILHEGSYFRNVFNILDMIVIAVSIADYSIGEDNLKQLKVLRLVLRPLRALNRA  
RGLKHVVQCVFVAIKTIWSIMLVTLLLVFMFAVIGVQLFKGRFYFCTDASKVDNTTCKGYYYNYPTGDLNQLQVE  
QRTWKESSEFNFDNVPNAMMTLFTITTFEGWPSILYRAIDATEPGRGSPSRNHQPLVAIYFVIYIIIVAFFMVNIFV  
GFVIVTFQTEGEQEYRNCDDLKNQRNCIEFALKTKPKQRYIPKNKLQTLVWKLATSLGFYEYTI FGLITLNTMTLM  
MQVYRPSKIYNDVLEYLNI GFTVLFIEAVLKIVAFKPKQNYFRDKWNVFDFVIVVGSIIDIVISEVYKGNVDVTV  
DFSVNFFRLLFRAMRLVKLLSRGGMRLLWTFMKS FQALPYVGLLIVFVFFIYAVIGMQLFGTIVASSGSAITEY  
NNFHSFFSSVLVLFRCATGENWQSIMLSCAVKKCQPSGNSCGSNITYLYFSSFYVLSSFLVINLFAVIMDNFDY  
LTRDFSILGPHHLDEFVQAWSFFDPEATGRIKFDDMVKLLRRISPPLGLGKLCPDSTAYRNLGMHMLPLGTDNNV  
KFNATIFALVRKQLKIKLDGNLDRDREL RNI IKRIWPRTPNKLLDEIVPLSLKDNDITIAKIYALLIIRNFIRR  
RRERQAKORREQTSNEIQVGIRVLQDLGQTNLRRASGELRSDEDEDEDEEFRT HANSQYTLKMFNQSFYRFGSSL  
KINSNSDLTSQKSSSIDSIKNKYCKAGITQSSHTLNRDHFSVNAQASNSVNTCEVTAVSRNTRCVIGQQGSGV  
QSFANSRECPSC LNDGTLKVDI PDTGYTKDKDGGIVNKLYGIDITNTGPSGMSSGTIDAGKIQYRRSSFERSVSV

>trinity\_TR14170\_c1\_g1\_i1\_m.27293|Hoilungia\_hongkongensis\_CaV2

MANDGYHNSLSTLKTGKVSERLRHLVSEKIAAKNAVKQQGFLRGHFRIWQYSRDKSLCCFPNNIFRKYARKLV  
DWTPEEYLVLLTIVANCVV LAMDVPLPDNDSTEISLLETRAEIGFLIVFCIEAFLIIIAKGGFFHPEAYLRSGW  
NLLDFLIVVGLVNAFYVNAASNEIDVKILRVVRVLRPLKLVSGMPSLQIVLRSLLTAMGPLFQISLLVLFVIVI  
YSIIGMDFFLGRFHTGCRDHRTGQLVTQNHMSPCDSNLNSGGFNCVINTTQYQFFGICNYKYDGPNYGITGFDH  
IFMALLTVFQCISLEGWTSLLYNTNNAVGSTFTWFYFLTLIIWGSFFMLNLVLGVLSGEFAKERDRVEKRREYIK  
LKENQKIERDFLGYLEWMGRAEDLMLGEQRLMDEETTS LRFDARSEIFQLTDKDQVAELAEITLSENPI NTKAYA  
TVMRSPKRSYFHMLRRSEKYCRLAIRRAVKSI AFFWIVILLVFLNAITIASEHSGEPLWLKDFREANIVFVLF  
TLELILKLYSLGAILYFSSTFNIFDFAVVIASIIELIVRSVGGPKLGISVFRCVRLLRIFEITKHWKSLSNLVA  
LISSLR SILSLLFLIGLCIMVFALLGMQLFGGRFNFAQGVPRSNFNDFGHAVLSVFQILSGEDWNEVMYNGIRAY  
RSSGEFVSYLVSLYFVVLVCLGNYTLLNVFLAIAVDNLTKAQEISKDENEIQLQKRLSIKRKNYSKDSGCPSAM  
TDGQYDIDDRPIDSI RTSSLT SFDRRSVPRSTRSTLRIRRISSQSIDDDDTLPTTSNNAIEHSVSRLLDDIEFDPN  
VDNENDNEEPNFRQKRIGSMKMN FQNAHEQPELII GREAFANVP ILEVNSLFLFSPQNRFRFCHYIVHLKHFE  
NFMIGAI I ISSGLLAVEDPMNEESDLNLYVLRVFD SI FTGIFLIELILKVIDFGFILHHSYCRNPWNILDMVVV  
TAVTSFIYFEIGTENQSNRNISAIKAI RTLRVLRPLKAI RTAKKLLACFQCMVNSLKNVINVCIVMLLFLFMFAV  
IGVQLFKGKFHYCTDQTKHTKSQCRGYYYHYSGGHVYVNEIFERRWEQHPYNFDNLPRAMTLFTMSTAEGWPRI  
LYWSIDATNENEGPIRDYNLAVALFFCIYIVVFPFFFINIFVALIIVTFQEEGDKDITNYQLNRNQRDCIEFALN  
AKPIHRHMPKDKKSYAYKVWRIVTSTPFEFIIMVLIIVNTIVLMMEYDQSKQYKEMLQIINITVTILFTVEMLL  
KVIAFSRNF I KEWNI FDFIVVIGSWTDI IITYASTNGTSTVSI SFFRLFRAGRLIKLLRKYTIRVLLWTF LK  
SFQALPYVGLLIGMLFFISAVLGMQLFGQIQSDPTTAIFRYNNFQTFTGALIVLVRVRCSTGENWPEVMLACLPGQA  
KCSAKFPDCGSYVAYPYFVVFVFLSTFLMLNLFVAVIMDNFKYLTRDKSILGPYHLHDHFLHTWAEFDPEASGRK  
HQELCTLLCRIPPLGFGSSCPTRMAYRKLMLKLGIPINGDNTIRFKATL FALIRNSLEIKVREDQHEADHELQCV  
IKKIWPQVTGRTLERILPQVEHGARHLTIGKIYAAMIIEYKYQYRKQQLREDEQVRI RTKSI FHRFIEAVRTP  
IRTNTHKESDAGIDSHQKHQRSKHFHSHSFKILRPSLRLSRKRDKMKPKKSVS AKPSDSSASGENNRSRSLPGLV  
FESIDDNTGNVLDGFPYPTNRIGKESDFCAEVHYGNEDSSSFYRQNGERSQTLDPQLAHRRQGSRFNIHNTS  
GANLQPSPLTFEPGRPLHRMIRTT PVGTPKSPQKISIVQSTYNSANNSPTTIRDHYNGTANLNNNNHTGNNTLSP  
TRGNHSSKLLKQHEDSNDSITGLPGLRLQKSTSSCGSTDD EYELSDAIPFNNLHELLPIDIPDVTISIPDSPYGS  
TDGLDKRSPSDNNSFSAYPRLPSPSGSNLSPLYQRGRFISQYFNNTSMNGNTQ EYQSNHKNHVSHTSSFMSNNN  
HRSLPFSNRNGAAHQSNYDPYRN NYENYGDDRDSTEFNKNYALS NFSFSQDDVANASKCTAV

>trinity\_TR4547\_c1\_g2\_i1\_m.11004|Hoilungia\_hongkongensis\_CaV3

MSSNGHGYHQQLATSSGCQADQSSHYPDRKRNHADTPYHKDSKLFNMLSTSSQDQPQQSYLQEDSIGHNYKVDD  
PCQFQNI AEE SQPEQQDSTNEAFDIEDEINPVVCWCLHKDKLPRKYFVKLSQWRWFERITIIIVILINCVTLG SYN  
PVNQAKNNNTCMDNLCRVTVGVVDNIIFGYFVVEMI IKMIALGILGKYAYF SNGWNRLDFIIVLTGCLEYFINDGE



FLTIIRTVRVLRLRAINRVPSMRLLVNLLDTPLLGNVLMCLFIVFSIFGIVGVQLWKGILHNRCTLQQNFSA  
PPGISLYKYYLPSYDEPDYVCSLPENNGINHCQQLTISNLTQDLTCKITNQSLADIYETEICSDFLQFYNTCS  
GPNIFFDNISFDNFAMAFIAIFQVITLAWVDIMYAIQDGHSSLDWIYFVILILIGSLFLLNFTLVV  
MATQFSETKRRVTKKARSSPSAIRSRGFSSTLSSNPESRTCYNECIRLIRRLLLYLMYLMQRFYSQCL  
KMKMWNHLYRQCITCKRKWISRHQSTTANGCQANGNVKFSVSDNHSFDNFHQNVFLPDVEGSCLSDG  
TERSTYLAFRLDNCSQRSYSLNR TNQHRQDLTLSEQLPGKALANPEMIRSAISGQYNGDTATIN  
SLYDETTDDDRDTTIHPSVNNNESPLFKLKLHNN SESKNTESSHSSNRKISNYKNFKSMIQRLR  
ICCKFSEGOQKFSLIVLLAILANTVVMAIEHHNQPLYQIQALEICN IIFTIFFTLEMLFKL  
FALGLLRYVKDSFNVFDAIIVIVSLVEIATDGKGLSVLRSFRLLRIFKIVRFLPTLQRQM  
MVMAQTFDNV IIFLGLLFLFMFTFSILGMHLFGNRFCLRRVNGPIACSRKNFD TLLWAFVTVFQ  
ILTQEDWNV MYDGMLARGKWAAYFLALVTLGNVYLLNLLVAILVNGFQEQEKDEKNRKKDLTAKM  
GRALKHYCDSITDVRSDD QPTDRQLSSQGNDDGYQIGKDLHGVATTRINEGFYKTTTICDHQIPH  
VELSTTNQLNKKEEEEEVDNPNDFYI RTFQISSKPYHCNKRSDNDLIEPNNIQIFPCRVPIG  
PRDPPQ TENKLAKLKRMPQWSKKKQWQAIRKYWICPEE VNNPNWLTRHRNHSLLMLS  
KDNRYRKWCRNIVKHPYFDRVILLFII FNCVTLAMERPGIIPNSTERQFLNLMIIIFTFI  
TSEMLIKVLALGLVTGDKSYLRSGWNILDLLLVVISWVDLIITYSGGASNILGVLRLV  
RGFRTLRLPLRVINRAPGLKLVVQTLFSSLKAIGNIVICVAFFVIFGILGVQLFSGKFYYCKAS  
DDVENKTQCVEQYGOSEWVNRPNFDLLVNASLSL FVISSKDGWMDITYHGIDARGVDLQPK  
KNHNVVLLYFISFLLL VGFFVLNMFVGVVVENFHK CQEEHERRLREKKNRKLQRAKKNQ  
KANPKKLTIKKKS KDKNDLIPPIENYPKWRKLYQICVHRYFDITITIVISLNVVFMATEH  
YNMSLVWEDVHKYANYFFTVIFTLEAAIHLVAFGVVYFRDRWNIFDLLIVILCWTGIIIES  
QVISNPTINPTIMRVMRLRLRIVRIKLKIKAAKIRALLRTIMNAMPQVINLGMLFLLFFFI  
FAALGIELFGRDC TESNPCNGLSQHANFKTFGMAMTLFRIATGDNWQGILKDTLRENC  
DRSINCQRNCCSNPILSSLFFIVFVLAQ YVLTNVVVAVLMRHL EESDEKENNDL DLGSS  
SAKESQGFDDGITESNNYPASSTDIHVPPNKNVSGIGEDLAI YPTKHSYNANFSSPI  
SKQNKYARITASRSINLI IANKPCLDQGECEFVLEDKFQIHHVRNKSSYISSDES  
SDSNET APAMLACGDNQGIRYRQERKDHDTKCVLSPVDRHQSSQNSQRGSIQND  
SNYCNNLLPDTSLSSNQLOSDTCM HNPDRIRLNTADYPHRFLSAKVNLPKR  
SSSWNYSSTSSAESYQHHQFSSKNFYPFIIYLSGKSTKDEYKDSNPVI VIAKEKRITL  
PRNMIQTLV

> XP\_004989719.1|Salpingoeca\_rosetta\_Cav1/2

MTNDDLSSRETVSWGERLRARDRWAEILLRLHKKDLKKFKRQLQDWESAKSLYVFGPDSFIR  
RCKRQIVNKNKIFE YFILVTILLNCVSLAAQDPTEDPNPNSDLTQTLDSLEYVFLAIFTLE  
ALLKIIATGFLFCGPPSYLRNKWNILDF IIVAVGLIGVVVEQSGSSVADV KALRALR  
VLRPLRLITSVQSLQIVLNSILL SIPALADVAMLLGFLIVYAIIG LEFYRGVLNHQC  
FLPSSDVGANVTADRYINNTPYFLAPDTAPCDPAGRGRVCSTDGLCLAGSSPNSNITAF  
DHAG IAILAVFQSITELEGWTDILYNVDDAVGYKNINWLFVSLVIVGAFFVINLV  
LGVLSGQFTREGDRMKASVKFLRA RRKEQHRFQVAGYRDWLSTARTLQPN  
EPWQSELPDHMVLYHRDKFLKFDAE SMAEHEQNFFNSSAGADGNDGDD DDD  
DIDDDATTVLVLGLSLPSGNRDFVEAEPT EPI SNIRTRIMQKFAEQGEDRDKLMS  
FVLAHPDHGHILDETRT LGEQGVQVKS LREYNEILTMSQHNQHELLK PATVQML  
SKLGAVKSRWFNLVVTFMVLVNTVLLAVQTDAGATDE AAF AFTIVEAS FVGLFV  
LEMLV KLAGLRPHMYFESKFNRFDLTVVLLSLELILVHTTGLRSIGISALRS  
LRLLR IFREMKQYWEDINDFVVSLLNSIASIVSLLLLILYMVIVAL LGMQIFGGR  
FDFEDPKPRINFDDFFSALLTVFI VIVGDDWNSVMYNGILAYNGVNKDGWVAIV  
FCVVVILGMFVLLNVFLAIAVKSLDDARDLKAARDEHKERWKAE AAVSDESEDD  
REDRRRHRQYANPLVGAAEQEKEEVELQNTVLCVDVNVPLRKHLTRAVANNKSL  
FCLGPRNSFRK FCNNIAYDNRFESVILLILISSALLAAEDPVNLDAQINKDLETAD  
IFFTSVFSLEMALKIVALGFIPYITDPWN DLDVAVV LASVSLAISSDDAAVVRV  
LVRVFRVLRPLRAIKRAPGLRKVVSCMVVISIKTIGNVFIVTFLLTFIYAI IGV  
QSFKECFGR CNDPDVMFKSQCNGTFLVEDDAGLFSNATRAWSTPYFNFDNVGK  
GMLTLFTVSTLEGWIDVMN NAIDCTAENRQPERNNNPVAALFFVTYVILVAF  
FMLNIFVGYVIITFSSEGESYEAVDGLDKNQKCLAFCLNAQ PIRVHRPLYRAQ  
ISIFRFVSSKHFEWFIMAAIIGNSIVLLMAYEGMPSDYEMGLQLCNIVFTGIFT  
VEALLKLFA LNPTGYFHDSWNFFDFIIVVGS LVDVFLSATQSSGDSGVNIGFL  
RLFRVARLLKLVSRGKGMKRLLLWTFAKSFQSLPYVAALIMMLFFVYAVIGQL  
FARTGFREDGDINEHNNFRDFFGALLLFRCATGENWQNMMRDIHLGPPNCDP  
ATEPGVCGSVVAVPFFCTFLVLC SFLILNLFVAVIMDNFEYLTQDNSLLGEH  
DLPQFIDRWSEFD PACTHRISHH DLMELLRSEEPPLGFGRKCPPKTVYSKMM  
RLNVPLHLDGTVDFHACLLAIVRNQLHIKTSYLDGSWEQRNYDLRK

LLEKLYDPPKEQLDRMLPPPSKRNVITIGVLYAVYLLQEIYRENKRNAARQARETAEVLDAGSNEEKQPSENEEV  
EDDLRLVEHAF

>NP\_059042.2|Rattus\_norvegicus\_Beta1

MVQKSGMSRGPYPPSQEIPMEVFDPSPOGKYSKRKGRFKRSDGSTSSDTSNSFVRQGSAESYTSRPSDSVLSLE  
EDREALRKEAERQALAQLEKAKTKPVFAVVRTNVGYNPSPGDEVVQGVAITFEPKDFLHIKEKYNNDDWWIGRLV  
KEGCEVGFIPSPVKLDSLRLLEQTLRQNLSSSSKSGDNSSSSSLGDVVTGTRRPTPPASAKQKQKSTEHVPPYDV  
VPSMRPIILVGPSPKGYEVTDMMQKALFDFLKHFRFDGRISITRVTADISLAKRSVLNPNPSKHIIERSNTRSSLA  
EVQSEIERIFELARTLQLVLDADTINHQAQLSKTSLAPIIVYIKITSPKVLQRLIKSRGKSQSKHLNVQIAASE  
KLAQCPPEMFDIILDENQLEDACEHLAEYLEAYWKATHPPSSSTPPNPLLNRTMATAALAASPAPVSNLQGPYLAS  
GDQPLDRATGEHASVHEYPGELGQPPGLYPSNHPPGRAGTLRALSQRDTFDADTPGSRNSAYTEPGDSCVDMETD  
PSEGPGPGDPAGGGTTPARQGSWEEEDYEEEMTDNRNRGRNKARYCAEGGGPVLGRNKNELEGWGQGVYIR

>XP\_038951224.1|Rattus\_norvegicus\_Beta 2

MVQSDTSKSPPIAAVAQESQMELLESAAPAGALGAQSYGKGARRKNRFGKSDGSTSSDTSNSFVRQGSADSYTS  
RPSDSVLSLEEDREAVRREAERQAQAQLEKAKTKPVFAVVRTNVRYSAEQEDDVPVPGMAISFEAKDFLHVKEKF  
NNDWWIGRLVKEGCEIGFIPSPVKLENMRLQHEQRAKQKGFYSSKSGGNSSSSLGDIVPSSRKSTPPSSAIDIDA  
TGLDAEENDIPANHRSPKPSANSVTSPhSKEKRMFFFKTEHTPPYDVVPSMRPVVVLVGPSPKGYEVTDMMQKAL  
FDFLKHFRFEGRISITRVTADISLAKRSVLNPNPSKHAIERSNTRSSLAEVQSEIERIFELARTLQLVLDADTIN  
HPAQLSKTSLAPIIVYVKISSPKVLQRLIKSRGKSQAKHLNVQMVAADKLAQCPPESEFDVILDENQLEDACEHLA  
DYLEAYWKATHPPSSNLNPLLSRTLATSTLPLSPTLASNSQGSQGDQRTDRSAPRSASQAEPEPCLEPVKKSQH  
RSSSATHQNHRSGTGRGLSRQETFDSQESRDSAYVEPKEDYSHEHVDRYVPHREHNHREESHSSNGHRHREPR  
HRTRDMGRDQDHNECSKQSRHRKSKDRYCDKEGEVISKRRSEAGEWNRDVYIRQ

>NP\_036960.1|Rattus\_norvegicus\_Beta3

MYDSSYVPGFEDSEAGSADSYTSRPSLSDVLSLEEDRESARREVESQAQQQLERAKHKPVFAVVRTNVSYCGVLD  
EECPVQSGSVNFEAKDFLHIKEKYSNDWWIGRLVKEGGDIAFIPSPQRLESIRLQEQKARRSGNPSLSLDIGNR  
RSPPPSLAKQKQQAHEHVPPYDVVPSMRPVVVLVGPSPKGYEVTDMMQKALFDFLKHFRFDGRISITRVTADLSLAK  
RSVLNPNPKRTIERSSARSSIAEVQSEIERIFELAKSLQLVLDADTINHQAQLAKTSLAPIIVFVKVSSPKVL  
QRLIRSRGKSQMKHLTVQMMAYDKLVQCPPESEFDVILDENQLDDACEHLAEYLEVYWRATHHPAPGPGMLGPPSA  
IPGLQNOQLLGERGEEHSPLESDLMPSDEASESSRQAWTGSSQRSSRHLEEDYADAYQDLYQPHRQHTSGLPSA  
NGHDPQDRLLAQDSEHDHNDNRNWQRNRPWPKDSY

>NP\_001386072.1|Rattus\_norvegicus\_Beta4

MSSSYAKNGAADGPHSPSSQVARGTTTTRSRLKRSRSDGSTTSTSFILRQGSADSYTSRPSDSVLSLEEDREAIRQE  
REQQAAIQLERAKSKPVFAVKTNVSYCGALDEDVVPVSTAISFDAKDFLHIKEKYNNDDWWIGRLVKEGCEIGFI  
PSPLRLENIRIQEQKRGRFHGGKSSGNSSSSSLGEMVSGTFRATPTTTAKQKQKVTEHIPPYDVVPSMRPVVVLV  
PSLKGYEVTDMMQKALFDFLKHFRFDGRISITRVTADISLAKRSVLNPNPSKRAIERSNTRSSLAEVQSEIERIFE  
LARSLQLVLDADTINHQAQLIKTSLAPIIVHVKVSSPKVLQRLIKSRGKSQSKHLNVQLVAADKLAQCPPEMFD  
VILDENQLEDACEHLGEYLEAYWRATHHTSSSTPMTPLLGRNVGSTALSPYPTAISGLQSQRMRHSNHSTENSPIE  
RRSLMTSDENYHNERARKSRNRLSSSSQHSRDHYPLVEEDYPDSYQDITYKPHRNRGSPGGCSDSRHRL

>XP\_002129248.1|Ciona\_intestinalis\_Beta

MACEPQYLGAETLPVHSAPVQQHHRGVRKKSCLRDESISESSNSMTRQGSADSYTGRPSDSDISLEEDREAL  
KRETERQALAQLEKAKTKAVFAVVRTNLNYNGSHDDDSPVQGSVAVSFEAKDFLHIMEKYNNDDWWIGRLVKEGCGV  
GFVPSPVKLEAIRQLQQAKSNKFYQSKTGGTSTSSSLGDNNTMSRRSTPPSSVAYDMDSNGVDEEDSDTANQQNT  
SSTTRSPKSSVSSAAQGTGKEARRKPPFFKQESIPPYDVVPSMRPVVVLVGPSPKGYEVTDMMQKAVDFLKRFR  
EGRISITRVTADISLAKRSVLNPNPTKRGAIKSNTRSSLAEVQREIERIFELARTLQLVLDADTINHPSQLTKT

SLAPIIVSLKISAAKVLQRLIKSRGKSQTKYLVNQMVAAEKLAQCNDLFDIILDENQLEDACEHLAEYLEAYWR  
ATHPPNMYSNPALARSTTNSQSPHLQVHVLTSLKRNL SFRSSRRGSMKPADKENE A

>TNN11948.1|Schistosoma\_japonicum\_BetaB

MTGDRYSGSGFAGNNFEEYDDEEYCDRADDEDDEEEDDDDEDDYKEENARQETEEQARILLEKAKTSKVVFVVRT  
NVAFHGSSVDDCPLPGKAVSFQVKDFLHIKEKFNNEWWIGRLVKEGCDVGFIPSPAKLEAMQNFARGMSKSSTG  
NFDNPRGTNSRPSTPPADGDTINRSYDEDGNPRREAPAGKASVSARGGRKPFKKSNDLPPYDVVPSMRPVVLI  
PSLKGYEVTDMMQKALFDFLKRRFEGRIITRVTADISLAKRSLNNPTRRAIMDKSSTRNQSLLEVQOEIERIFD  
LARTQQLVVLDCDTINHPSQLSKTSLAPITVYLKISSTKVLQRLIKTRGKSQARNMNVQMVAEKLLQCTNDQFD  
VILEENQLPDACEHLAEYLEAYWRASHPTGKVTKAERILGIGTGVSNGQAI DNEGTHGGMHRRQSNAFKNEKRKL  
KNDQDYNGSRDYSNSVSSPIRSSTEFENRRYVDEQDLHSDDDYHYRPHNETRTVWNSAEKNIYSPSHEYRLSPN  
KTFQHDRHITESNRINPVSVATNIPYNHPHYNAEESDSPMENERFLVNSDYPKGRRSRQGSIMI

>AAK51116.1|Schistosoma\_japonicum\_BetaA

MGSRRSSESTSSVDSEVILEAERLELERLALKELELAVSKPVAFSVRTNISFDGALYGLDAPSPTKVVSFGIKDF  
LHIKKRFNQDWWIGRVVRI GSPIGFIPSPSKLEVINNIILSTITTTTTTTTTNVVHFANEIQNPNTKPAVGGFGS  
ADTTLERGGNRGLLLSNDVDHRGPTLAVNRQRQSESPVHKNWKVDVGYDEDDLDRDPTQTADNSGQTTAKKLQP  
IGPGIKKKAFFSKNEFVPPYEIVPCMRPVVFGPALKGYEVTDMMQKAI FDSMKKHFDGRIIVSRVSTNISLAKR  
VGELLHLDDKNIMEKGRSRQLVSLIEVQQDLERIFHLSSKMQLLLLDCAINHPNQISKTCLAPIVYIYIKISSLR  
VLNRLIKNRGKLQKKNAGVQTAAAEKLLQCSPEFDYVIDQNTLSAATEALSHFLEGYWAATHPPLIVSKAERLL  
GSFSAPVPDTKEVSDRPLVPMTPGHPLSVVTKSALSAGFTSQEISELTGARAAGWLTENGGPTVENELGLTGA  
HHIGSVGSEFHNTHYGGRKLTDDHNTLDSVNMQHASDDENEGTRPRYPRNGRLQVGAANAALAAVAAGLSPK  
SHSIHPSLFDNENKRNCSI IHDSQGHNTHE SPGLTMGLGLGIASGVAATISAALFPGHNNNQRRHHQHQSTEAAH  
QPISSRLPPPTFAAAAVASVSPPLKELGIHQVEGTDGTQVYQSR SARQARQREQELARVKQEVEAKALALQATV  
GNRRKRDRERKQKNLDRLLGFI

>AEE65420.1|Lymnaea\_stagnalis\_Beta

MRIKAGETNGLQGNMESNPIMHETLPQGRMGRLLKKEVTSGLSIDISLGSADSNYSQPSSDISLDEEKEALRETE  
KQALSQLEKAKAKPVFAVVRTNVS YDGSADDDSPVHGCAVSFGVRDYLHIKEKFNNDWWIGRLVKEGCDVRFIP  
PAKLENLKTQSGGGGRQGKLYTSKTNSSSNIDNLLNSSKPSNSRGSTPPTPGVQFVSPGIEETQNGVDSNVGEDS  
DSLGNSSKSKASITPPTKEKRKPFKKSSESAPPYEVVPSMRPVVLI GPSLKGYEVTDMMQKALFDFLKHRFEGRI  
ITRVTADISLAKRSLNNPSKRAIMERANPRASGLAEVQAEIERIFELARALQLVVLDCDTINHPSQLAKTSLA  
PIVAVYKISSPKVLQRLIKSRGKSQSRNMNVQLVAADKLAQCAPEMFDVILDENQLDDACEHLAEFLEAYWRATH  
PPNMSPPSPHGRGHPAGSSMPLNRHNTAPASHMSHSRSGSLERVNSPDSRQHHRHREHSTHHHHHDRQSSSRHH  
DDYDSDRHGDHHRSHDRDHDHSHTSPRGSKYPVRQGSIDI

>XP\_026300363.1|Apis\_mellifera\_Beta

MSRQLRAERDHSVSRCDLQEQRDFRDLRDLRDRDPRDLRDYRDRDIRDDRDDVERVRDDYLDYDHHPTAAST  
SALTNNPERSNGRATLHEGRDDLQLVNLCVPPRSTIVGSADSNYSQPSSDLDEEKESLRREKERQALNQLEKARTK  
PVFAVVRTNVS YDGSVDDSPVHGSAVSFEVRDFLHIKEKYDNNWWIGRLVKENSVDVGFIPSPVKLEALRQASAA  
RGTGGLYSARGGSSGNLGE SGMPSRGSTPPTPGDSDSVRGGKATLTTPPAKEKRKNFFKPSYETTTTPYDVVPS  
MRPVVVLVGP SLKGYQVTDMMQKALFDY LKHRFRGRIITRVMADISLAKRSLNNPTKRAIMERSTSRSSCLAEV  
QAEIERIFELARTLQLVVLDCDTINHPSQLAKTSLAPTIVYLKISSPKVLQRLIKSRGKSQIRHLNVQMVAEK  
LAQCPEMFDVILDENQLEEACEHVAEYLEAYWRATHPQVIPA VPRPI PAPDAPVDVLT PRVTS GAHRESY YGHEP  
RGHSGGHVSEGSRSRLERMDRDRGDRGEHDYGNEEESYVSGVDYGSASRRRQQQDPRALNAI

>NP\_001245979.2|Drosophila\_melanogaster\_Beta

MVQRASSSDAPSVQGGQHRESRFLGYPSYQSGYNKLF TQGSADSNYSQPSSDLDEEKESLRREKERQALSQ  
DKARSKPVFAVVRTNVA YDGAIDDDSPVQGGAVSFEIREFLHIKEKYDNNWWIGRLVKEGCDVGFIPSPAKLDNI

RMQNQTRPSRLYGTKGSSSGNLGAGGQAGAEP SRDSMGPRHGKTPAAAAANKEKRKPFKQETASPYDVVPSMR  
PVVLVGP SLKGYEVT DMMQKALFDLFLKHRFEGRI I I TRVMADISLAKRS IMNPNPKRAIMERSSSSRSDCLGKVQE  
EIERIFELARSLQLVVLDCDTINHPSQLAKTSLAPTIVYLKISSSKVLQRLIKSRGKSQAKNLSVQMVAAEKLAQ  
CPPDMFDVILDENQLEDACEHIAEYLETYWKATHPDIRAVPPIARPLPQEASPSADPARLGPTPPGGTSYQHSRR  
QPTSVRHQERGGG V GAGGGGGVGGGYERDRERERYERRERDLMHYDLNSDELLDERNF EYPAMRSGPSGASHHG  
HLSRGGRLLEDPDFEREEAQMRMSSSRYGPSTRIDDPDLPRGATVVDRDEYSPHRGGGSSRRMLNAMSRLPLGLP  
RQSSLPSNRAPVSYLPRQSSLGTHWLSSSSQSNLDQGPQSRRELYPLLHQPSYSQPRSQYTSHSYTSAPQHTSQ  
SRSQSQSHSQSHSQYRYSVQDTSFAHPPRSLREEFLSPTMSKVEAVTHAIRNKIIVEEDEEDILSTDRFY

>NP\_491193.2|Caenorhabditis\_elegans\_CCB-1

MAFRRRGSGDSNF SHHDELELEAGNRETLRRDAERQAALQLERAKYKPVAFVCTNVEYDGSVDDDDSPVHGCAVS  
FKVKDFLHIKEKYNNDDWWIGRLVKEGHD LGFIPSPVKLES LRQQTAKSGKFKQSTSATNLGALDNMMPRSGSRGS  
TPPTPDDDEYN AKKMTNIVTTPPTKEKKKLI FKKVQQENVPYDVVPSMRPVVLVGP SLKGYEVT DMMQKAVFDY  
LKHRFEGRI I I TRVTADISLAKRSLNPNPKRAMMERANSRTSNSLAEIQTEIERIFELARSMQLVVLDCDTINH  
PSQLAKTSLAPIHVYIKISSPKVLQRLIKSRGKSQSRNMNVQMVAAEKLAQCQAE LFDVLLDENQLEDACEHLAD  
FMEAYWRATHPPVRSPPRIKRNPMENRGPSTLFTPAQMMQGFQGNAGQLPPQLQPQOSIASMSQMGGMGSMNPP  
YLAPPMQSGRPGMPSISVQQATGSYGGMQQQPQQQQPMQSA PPPAPQRQTSYDRHGFDEYDDMDMSHQYERGTYR  
Y

>NP\_001293380.1|Caenorhabditis\_elegans\_CCB-1

MSMGALIGSRLWKQGCTYIHTRLIYLCRRIPRGYIFREKMHSVARENLQAYLHSYKLS SNEPGIKLMHNSQRDDQ  
HRKDVEHF AALRALQH SKRKHVAFVQAMRDYDGLSDEKSP LKDHTISFNTNDFIHIHTKFNSDWWIGRIVRSHS  
EFGFVPTARRLANYMVSDEDPVKHNTSDHQDRSIWE PKCPYKVPSSRP I VLLGPTLQHSRLTQLLHLALREEI  
LKHFGKNM KYVKS D I GSGQQSGDRKGARWLRLGRDYDRGQDENQLEVELIMRMTSKLHLLLVDSPHIHTPDDVQHL  
PLSPIFFLIRVSDNKILAKLLRNTGTT RMAAEIEVANVLKTMNDDR VGGHDDEQLIARGFEMVIEENGLREATRR  
IISYLEKYIHALHYHKKDDEI

>XP\_001629160.2|Nematostella\_vectensis\_Beta

MSVRRKKSTIGSFRRKNSKSPNYLNFDPENGLFGDERRRRVSSISSSSEFSIPPYEVVPATRP I I VLGPSLRGYE  
VTDLMHKALYNYLKKRFAGKINIYKTHADIGLSKRSSKSNPNEKERFNLVKSGGQRVTAEVQREVERIYELTKSL  
NLVVIDSEAINHPSQLTDCSLAPVVVYIKMPPDILQKLIKLRGRNRKNMGVQVVG TQKLTQCND EMDLILDEAI  
FEDAC AHLGEFLDQYWRDLHPDDPEELR KMI INGADFPDRPNPLISSMSGRHKSAYDRRQSVAPPRAPDPERVLA  
LQPATAARQSVSSNESGPANKNSIRRQRQGEKEVHG MARVSEARGLMPGNQYAGGEIPPEYQGYEDEAQYGYDQS  
YCAEQGYEQGF DYA AENPYGSPMALQDYSSTGQYDPNQYGA EIYEGQYQEGGDYQYNAELGYQDYSPEYDSQQY  
GQEPQYGYQADSSG PLQGGLPYHAQGYGSYDERYPVADGGY

>XP\_032218347.1|Nematostella\_vectensis\_Beta

MEPEPGLSEQDIELDSLEQVSTASSFHSDIQRHYNDGREASRF IGADDFNRDSDPAYRASDTSSIEEDRETSRRE  
LERRAWDALQAARSKPVAFVVRTNLRYD GSEDDDDSPVHGAAVSFEAKDFLHVKEKFNDDWWIGRVVKEGCDIGFI  
PTPSKLSLQQIGGTASGRGMRNSKR DVFQFDMVNQAQSPTNTSPSRHSSTSVDAENGVEYDDDQQSPTSPTNKT  
LPRSASGTTVSSQPGTATGTQGKPKKGLFKKQEQLPPYDVVPSMRPIVVLVGP SLKGYEVT DMMQKALLDFMKHRF  
SGRVLIARVTS DISLAKRTNMSNPGKQTIMERTKNKNTGLAEVQQEIERIFELARGLNLVVLDCETVNHTQLAK  
TSLAPMIVYIKIAAPKVLQRLIKTRGKSQSRNLSIQLVAAEKLAQCSEDMYDLVLEETQLDDACEHLGEFLESYW  
RATHPPNQPGSRPPNVQPSNSTPQYNVIEGGERPSVYL

>EVG1279646|Trichoplax\_adhaerens\_Beta

MPQEHSDSSANESTSGRSKKQSTSSGDGAVQTQMWGILRRQKNVQKSLGSTTNGSDTSSVKSQEEDNNIRRSSA  
SDDSEGVEAESCRELEDRARVSLDRAKSKTIAFAVRANVGFNGSVDDDDSP LPGYAVSFDSKSF LHVIEEFNEEW  
WIGRVVKVGAGFGFVPSPIKFENLKLQSSITSIKSIPRTTARSISNQNYSYVKEASTFVGATASGIDEISSPR

TVDITCEDEEEFPDVKEERSGTGLSGIRSKRILFKKMDSQSPYDIVPIMRPIVLVGPSTLQYEVTDMLHKALLDY  
LKQKFAGRIAFMKVTADFSLAKKMTPOAASKIAVMEKNSNKFSGLVEVSNTVVKRVFEMAKNNMQLLVLESDAINH  
PSQISKTNLAPLIFYVKIDNVKVLQRLIKSRGKSQSKYMNAQLVAAEKLQLCNEDQFAAILNENLLREACEHLGD  
TLEEYWLACHPPSSVSRNQSANCSPARSRHDTLHNVSRHQTPKNSPKLPQRLHNFLSRSSSNKT

>m.30996|Hoilungia\_hongkongensis\_Beta

MPQERSDSSANESTSGRSKKQSTSSGGDGAAPGQVWVWILRKQKNVQKSMGSTTNGSDTSSVKSQEEENIVRRLTS  
ASEDSGDIDAESQRRELEDRARVCLDRAKSQAIASFVRANISFNGSVDDDSPLPGYAVSFDSKSFHLHIEEFNEE  
WWIGRVVKGAGYGFVPSPTKFNELKQSSISSIKSIPRTNSRNTAGQNFYSYFVREASTIASSTATGVNEISSP  
RTIDINCDEEYEPADVKEERSGTGLSGIRPKRTLFKKMESQLPYDIVPIMRPIILVGPSTLQYEVTDMLHKALL  
DYLKQKFAGRITFMKVTADLSLAKKMTPOMASKITVMDKSSNKISGLVEVSNVAVKRIEFEMAKNNMQLLVLESQI  
NHPSQISKTNLAPLIFVVKIDNAKVLQRLIKSRGKSQSKYMNAQLVAAEKLQLCNPDQFAGILNENQLREACEHL  
GDTLEEYWLACHPPSAVSRNQSANCSPARSRHNTLHNVSRHQTPKSSPKLPQRLHNFLSRSSSNRI

>XP\_004990138.1|Salpingoeca\_rosetta\_Beta

MMQRSRRRRQTAKRKSQKLTFLDSRVWEEYAVEGKPLFTFRSEVWYDGFSDPCVPLPEFAVRINANDVVQVAKIL  
DDDWWIGRVVGHGACRYIPSPQKWWQLWSASDADASPKSTAARLKVLRQRRQQQQQQQEDD DALADGASSSQQP  
SLASVFNKNRATVPDEFIAHARNGAKLEDCYVIVPDIRPLVFFGSPKSGFATS DLMQALMTYLKVSFPGRVFM  
DCTLRRQAQVAVATTAEGTRIADPATADSEPFQAEDVERIYRLAKEGKMALVQCDSDRPDELLRSSTLPLLVLR  
MNNPAVILPKLAKETIDAGRKLGSQIAAAERLNAMDDSTWDLVLRRCRFDVSCYELAAAYVDAYIGESTLELTIDP  
RMLHPV

>NP\_037051.2|Rattus\_norvegicus\_Alpha2Delta1

MAAGCLLALTLTLFQSWLIGPSSEEPFSPVTIKSWVDKMQEDLVTLAKTASGVTQLADIYEKYQDLYTVEPNNA  
RQVEIAARDIEKLLSNRSKALVRLAMEAEKVQAAHQWREDFASNEVVYNAKDDLDPERNESESGSQRIKPVFI  
EDANFGRQISYQHAAVHIPTDIYEGSTIVLNELNWT SALDEVFKRNRDEDPTLLWQVFGSATGLARYYPASPWVD  
NSRTPNKIDLYDVRRRPWYIQGAASPKDMLILVDVSGSVSGLTLKLI RTSVSEMLETLSDDDFVNVASFNSNAQD  
VSCFQHLVQANVRNKKVLKDAVNNITAKGITDYKKGFSFAFEQLLNYNVSRANCNKIIMLFTDGGEEERAQE IFAK  
YKDKKVRVFTFSVGQHNYDRGPIQWMACENKGYEYIPI SIGAIRINTQEYLDVLGRPMVLGDKAKQVQWTVNY  
LDALELGLVITGTLPVFNVTGQSENKTNLKNQLILGVMGVDVSLEDIKRLTPRFTLCPNGY YFAIDPNGYVLLHP  
NLQPKNPKSQEPVTLDFLDAELEN DIKVEIRNK MIDGESGEKTFRTL VKSQDERYIDKGNRTYTWTVPNGTDYSL  
ALVLPYTSFYIYKAKIEETITQARSKKGKMKDSETLKPDNFEESGYTFIAPREYCNDLKP SDNNT EFLNFNEFI  
DRKTPNNPSCNTDLINRILLDAGFTNELVQNYWSKQKNIKGVKARFVVT DGGITRVYPKEAGENWQENPETYEDS  
FYKRSLDNDNYVFTAPYFNKSGPGAYESGIMVSKAVELYIQGKLLKPAVVG I KIDVNSWIENFTKTSIRDPCAGP  
VDCCKRNSDVMDCVILDDGGFLLMANHDDYTNQIGRFFGEIDPSMMRHLVNI SLYAFNKS YDYQSVCDPGAAPKQ  
GAGHRSA YVPSITDILQIGWATAAAWSILQQLLSLTFPRLLEAVEMEEDDFTASLSKQSCITEQTQYFFKNDT  
KSFSGLLDCGNC SRI FHVEKLMNTNLV FIMVESKGTCPCDTRLLMQAEQTS DGPDPDCMVKQPRYRKGPDVCFDN  
NVLEDYTD CGGV SGLNPSLWSIFGLQFILLWLVSGSRHYLW

>XP\_006243797.1|Rattus\_norvegicus\_Alpha2Delta2

MAVPARTCGASWPGPVRTARPWPGRGPRPCPDPRGPASGPARPLLLLLLPPLLLLPLLTAPGASAYSFPQQHTMQH  
WARRLEQEI DGMRI FGGVQQLREIYKDNRNLF DVQENEPQKLVEKVAGDIESLLDRKVQALKRLADAAENFQKA  
HRWQDNIKEEDIMYYDAKADAELDDPESEDMERGSKTSALRLDFIEEPNFKNKNVNSYTA VQIPTDIYKGSTVIL  
NELNWTEALENVFIENRRQDPTLLWQVFGSATGVTRYYPATPWRAPKKIDLYDVRRRPWYIQGASSPKDMVIIVD  
VSGSVSGLTLKLMKTSVCEMLD T L S D D D Y V N V A S F N E K A Q P V S C F T H L V Q A N V R N K K V F K E A V Q G M V A K G T T G Y K  
AGFEYAFDQLQNSNITRANCNKMIMMFTDGGEDRVQDVFEKYNWPNRTVRVFTFSVGQHNYDVTPLQWMACTNKG  
YFYEIPSIGAIRINTQEYLDVLGRPMVLGDKAKQVQWTVNYEDALGLGLVVTGTLPVFNLTQDGPGEKKNQLIL  
GVMGIDVALNDIKRLTPNYTLGANGYVFAIDLNGYVLLHPNLKPQTTFNREPVTLDFLDAELEDENKEEIRRSMI  
DGDKGHKQIRTLVKSLDERYIDEVIRNYTWVPIRSTNYSLGLVLPYSTYYLQANLSDQILQVKLPISKLKDFEF

LLPSSFESEGHVFIAPREYCKDLNASDNNTFLKNFIELMEKVTPDSKQCNNFLLHNLILDTGITQQQLVERVWRD  
QDLNTYSLLAVFAATDGGITRVFPNKAEDWTENPEPFNASFYRRSLDNRGYIFKPPHQDSLRLPLELENDTVGV  
LVSTAVELSLGRRTLRAVVGKLDLEAWAEKFKVLASNRTHQDQPKCGPSSHCEMDCEVNEDLLCVLIDGGG  
FLVLSNQNHQWDQVGRFFSEVDANLMLALYNNSFYTRKESYDYQAACAPQPPGNLGAAPRGVFPVPTIADFLNLAW  
WTSAAAWSLFFQQLLYGLIYHSWFQADPAEAEAGSPETRESSCVMKQTQYYFGSVNASYNAIDCGNCSRLFHAQRL  
TNTNLLFVVAEKPLCSQCEVGRLLQKETHSDGPEQCELVQRPRYRRGPHICFDYNATEDTSDCGRGASFPPLSGV  
LVSLQLLLLLLGLPPRPQOIHSFAASRRL

>XP\_017455566.2|Rattus\_norvegicus\_Alpha2Delta3

MAGPGSLCCASRGASALLATALLYAALGDVVRSEQQIPLSVVKLWASAFGGEIKSIAAKYSGSQLLQKKYKEYEK  
DVAIEEIDGLQLVKKLAKNMEEMFHKKSEAVRRLVEAAEEAHLKHEFDADLQYEFNAVLINERDKDGNFLELKG  
EFILAPNDHFNNLPVNI SLSDVQVPTNMYNKDPAIVNGVYWSESLNKVFDNFDRDPSLIWQYFGSAKGFRRQYP  
GIKWEPPDENGVI AFDCRNKRWY IQAATSPKDVVILVDVSGSMKGLRLTIAKQTVSSILDTLGDDDFNIITYNEE  
LHYVEPCLNGTLVQADRTNKEHFREHLDKLFAKGIGMLDIALNEAFNVLSDFNHTGQGSICSAIMLITDGAVDT  
YDTIFAKYNWPERKVRIFTYLI GREAAAFADNLKWMACANKGFFTQISTLADVQENVMEYLHVLSRPKVIDQEHV  
VWTEAYIDSTLPQAQKLADDQGLVLMTTVAMPVFSKQNETRSKGILLGVVGTDPVKELLKTI PKYKLGIGHYAF  
AITNNGYILTHPELRPLYEEGKRRKPNYSSVDLSEVEWEDRDDVLRNAMVNRKTGKFSMEVKKTVDKGKRVLM  
TNDYYYTDIKGAPFSLGVALSRGHGKYFFRGNVTIEEGLHDLEHPDVSLADEWSYCNTDLHPEHRHLSQLEAIKL  
YKKGKEPLLQCDKELIQEVLFDAVVSAPIEAYWTSALNKSSENSDKGVEVAFLGTRTGLSRINLFGVGAEQLTNQD  
FLKARDKENIFNADHFPLWYRRAAEQIPGSFVYSIPFSTGTVNSNVVTASTSIQLLDERKSPVVAAVGIQMKLE  
FFQRKFWTASRQCASLDGKCSISCDDETVCYLI DNNGFILVSEDYQTGDFGFEVEGAVMNKLLTMGSFKRITL  
YDYQAMCRANKESSDSAHGLLDPYKAFLSAAKWI VTELVLFLVEFNLCSSWWHSDMTAKAQKQKQTLPCDTEYPA  
FVSERTIKETTGNIACEDCSKSFVIQQIPSSNLFMVVVDSSCLCESVAPITMAPIEIRYNESLK CERLKAQKIRR  
RPESCHGFHPEENARECGGASSLQAQVALLLLPLVSSLSFR

>NP\_001178680.2|Rattus\_norvegicus\_Alpha2Delta4

MPRDLGGSKFVHRSRSTVLLPCPSPSGNTMARSPTLSSSHSWGHRGQQTAAWTFLRKMPIVLWLLLLLDTSLPTARS  
QATI PLETVKLWAETFRDLYSTVTRYSGSLLLQKKYKDAEPSLKI KEVDGLELVKKFSEDMETMLRRKVEAVES  
LVEAAEEADLNHEFNASLVFNYSVLI NEKDDKGNVELGAEFLLES DAHFNNLRVNVSMSSVQLPTNVYNKDP  
DILNGVYMSEALNPVFVENFQRDPTLTWQYFGSSTGFRIYPGIKWTPDENGVI AFDCRNRGWYIQAATSPKDIV  
ILVDMSSGSMKGLRMAIAKHTVTTILDTLGENDFVNI IAYNDYVHYIEPCFKGILVQADRDNREHFQKLVDEL MVK  
GVGIVSQALIEAFQILKQFQESRQGS LCNQAIMLVTDGAVEDYEPVFETYNWPDRKVRVFTYLI GREVTFADRMK  
WIACNNKGYTQISTLADAQENVMEYLHVLSRPMVINHDHDI IWTEAYMDSRLLTSEAQSLMLLTTVAMPVFSK  
NETRSHGILLGVGSDVTLRELMKLAPRYKLG VHGAF LNTNNGYILSHPDLRPLYREGKCLKPKPNYNSVDLSE  
VEWEDQAEILRTAMINGETGSHSMDVKVPLDKGKRVLFLTNDYFFTDISDTPFSLGVVLTGRHGHEYILLGNTSVE  
EGLHDLLHPDLTLASDWIYCI TDIDPDRKLSQLEAVRFLTGVDPDLECDEELVREVLFDVAVTAPMEAYWTAL  
ALNISEESEPGVEVAFLGTRAGLLRRSLFVGSEKVS DRKFLTPED EASIFTMDFPLWYRQASEQPPGSFVFNLR  
WAEGPSDPGKPVAVRASTAITVTVDGKTAIAAAVGIQMQADYLQRQFWAAMQQCNTVEGPCPKRCQD TDLDCFVI  
DNNGFILISERPQEI GRLLGEADGALMTQLLSMGVFSRV TMYDYQAMCKPPDHHSAAESLISPLSAFLTVAKWL  
LHECLLFLFEWSAWGSWQDKGSEAKAVFHSHKHKKQDLLHPCDTEYPVFVHQTAIREANGI IECGGCQKT FVMQ  
QIPSSNLLLLVTDRTCDCSAYSPI LQEATEVKYNASVKCNRMRSQKPRRRPGSCHAFHPEENAQDCGGASDTLPS  
SPLLLLALWAWRLPPQLLW

>NP\_001178687.1|Rattus\_norvegicus\_CACHD1

MAREPEEEETVRTAALVRRCPRCPGWPGAPRPPFWLLCLVACWILGAVADADFSILDEAQVLASQMRRLAAEELG  
VVTMQRI FNSLVYTEKISNGESEVQQLAKKIREKFNRYLDVVNRNKQVVEASYTAHLTSPLTAIQDCCTIPPSMM  
EFDGNFNTNVSRTVSCDRLSTTVNSRAFNPGRDLNSVLADNLKSNPGIKWQYFSSEEGIFTVFP AHKFRCKGSYE  
HRSRPIYVSTVRPQSKHIVVILDHGASVTD TQLQIAKDAQVILSAIDEHDKISVLTVADTVRTC SLDQCYKTYL  
SPATSETKRKMSTFVSSVKPSDSPTQHAVGFHRAFQLIRSTSNNTFRQANTDMVIIYLSAGITSKDSSEEDKKT

LRVINEENGFLNNSVMILTYALMNDGVTGLKELAFRLDLAEQNSGKYGIPDR TALPVIKGSMMVLNQLSNLETTV  
GRFYTNLPNRMIDEAVFSLPFSDEMGDGLIMTVSKPCYFGNLLLGI VGV DVN LAY ILE DV TYY QDSLASYTFLID  
DKGYTLMHPSLTRPYLLSEPP LHTDI IHYENI PKFELVRQNILSLPLGSQIITVPVNSSLSWHINKLRETGKEAY  
NVSYAWKMVQDTSFILCIVVIQPEIPVKQLKNLNTVPSSKLLYHRLDLLGQPSACLHFKQLATLESPTVMLSAGS  
FSSPYEHL SQPETKRMVEHYTAYLSDNTRLIANPGLKFSVRNEVMATSHVTDEWMTQMEMSSLNTYIVRRYIATP  
NGVLRIYPGSLMDKAFDPTRRQWYLHAVANPGLISLTGPYLDVGGAGYVVTISHTIHSSTQLSSGHTVAVMGID  
FTLRIFYKVLMDLLPVCNQDGGNKIRCFIMEDRGYLV AHPTLVDPKGHAPLEQQHITHKEPLVANDI LNHPNFVK  
KNLCNSFSDRTVQRSYKFNTSLVGDLTNLVHGSHCSKYRLTRIPGTNAFVGI VNETCDSLAF CACSMVDRLCLNC  
HRMEQNECEPCCEPLEVNECTGNLTNAENRNP SCEVHQEPV TYTAIDPGLQDALHQCVNSRCNQRMESGDCFGV  
LDCEWCVVDS DGKTHLDKSYCAPQKECFGGIVGAKSPYVDDMGAIGDEVI TLNMIKSAPVGPVAGGIMGCIMVLV  
LAVYAYRHQIHRRSHQHMSPLAAQEMSVRMSNLENDRDEREDDSHEDRGI ISNTRFIAAVMERHAHSPERRRRYW  
GRSGTESDHGYSTMSPQEDSENPPCNDPLSAGVDVGNHDDDLDLDTPPQTAALLSHKFHHYRSHHPTLHSHHL  
QAAVTVHTVDAEC

>XP\_026693329.1|Ciona\_intestinalis\_Alpha2Delta

MKLKTSIRVQYFLVTFLSLSLHMQWICTTCFAVSLGAQASNNELAQSFGAALNVKATLYSGYAAMQSTYENRLN  
AGVFTVHRLNGTKLIKTMAADLEKMLNRKRLAVERLVQVAERHAAKYDWDKEPSDEYNNIQYINAPEPSNIEEDD  
YASLRKMQMFKSDARFERDVNKNTSIVQVPFNVYSKGTLLKSVGWSKALNQQFKRNLELEPSLKWQYFGSTEGY  
IRVYPGFQWRMRAGPHDQLNIYDCRTRLWYTSSTYPKDMIILLDRSGSMKGLKKSIAIDAVSALLD TLGDNDFF  
NVLTFSSKVI PVDP CYNSTLMRADRTNKENVLTRLRDMETS DIANFKLALKSTLDI IAEFHNRGDGSGCDCEIML  
ITDGAPDSYQYIFDQAHNLSISQSHFRVFAYLVGQDKNYLEPVKDMACNNNGFFTQVKSPTGVTEQVLH HVNVMN  
RPLAYQGDHHTWTKAYYDTNNGDEGFGLISTVASTVYKMPGEP TAF LGIMATDVPI SDMMNSMPINRIGVNAY  
VYMTNNAYVMFHPWLETKYVGWDGKVKTKLDYNSIDIDKLEKDDGHAEIRSALVNRRTGQVSTKQHYTPLDNM  
KSLLISSGVYFVPVADTFPSLAMFLPSKYGHTKVNYSANLRSIRYDAI IDEVHCNEKQMRNDWVEIDRIA AIC  
SLRYSDVSV AETWRYCWFKNKQSI EEMGWSQIDMLKRYLLSPNSQTIKCNQELVNGVLF DVYLTATLQSVWSEQ  
KMHQNTSGKGIEMTF FISRSGVVRKYWHTDAQDAYKEDRNVVFRFDKLEYPLIYRRAVTQPKDSWL YVVPPTTRG  
NNKQVVFAAKAVRQKEAIMGVSGMLLGYESFASLFWDEVAQVYGVDCMDRTNKRFCYLVDDNAKIVLSKENQEVG  
RFFGEINGHVMNQLIEAKVFDRIVLTDE TAMCQVKQTKKNVGS AASNRYNLPFFSVWSYFMWWTKELVVLLANV  
ALYNWWT LAVVSQP VQANIRNQP NYRPCNQKYE V FVANRSKTPY TNRTWCKDNYAMLCEGEFGVFNVSNSNLF LI  
VTEQLWASDFERERCNSGKSEPFSPIRGLEVEAAMEDTCWRAKIIKERKRPLSCLQAKEGAPVKEQPCTTEVKP  
PTNSGAKLLPFWGGIAAKSSKGLRTFYSAWISCLTIHMVVI AVFSVICDGSLLRSPVL

>XP\_002126163.2|Ciona\_intestinalis\_Alpha2Delta

MKFV IIFVVAITL FQKCHSTSTLLWLDELTKRYAQQINVMVENETLLS QLKL VYESYHPVIKRIEPSN I LK LKL  
ESLQEILKQAETT IMDIAAEGEEIKRSFNNSIRLTNQDIRFYNKESNDSVLFN ELVKQNQSKFYFNAKCNGLQL  
PEGYLPEDCYQPPGGFERSE LFLGQNVSLHTSAVHI PLEVYNEGQV LNDIAWTQNLDMKFKEKLCSSGTRWMFV  
GTNTGVFRYFPAPWNTQCLYHDLHDVTKVSWFVKGMTSPKDV LIMIDTSGSIIIGITLSLIQTSVKKLMSTLTEN  
DFNIFVFNNEPKFLQPSCP NLMQATPKHKQMAAGWLSNLT VHNSSAFEKGFDFAFEILTQSNLNTTHRPIRAG  
CNSAILLFTDGGAAAYPSQVFKKWNLDKEVRVFTYSVGKPFSS TTTLQMACNNRGEFTAIPSYSATNLQTRK YLS  
KLGRPLAFNQKKTNKWTLPYIDHIGSIGSVMTVTRPIYEDYID DVTAERKLAVSAIVGTDILHDDVQQALDVSEF  
GSNVYSFGVDNNGFLFHHPK LKQGR LNDPVTVDI SDVAIATNITQIRKKMIKRIT EDFHVIDMLVSMDGQHINNE  
ESIYSISP VQDSLFSGGISFPLRQLNQLDSGAVVEQRRI TFESILFNETNIKS FVYGLQC IKIPADQTCRSTNQI  
TKVSADILMSDVTRETLCAEGEVSKSRFDDLLLHGSVTRRLAISYWKNHFTDSQTVLSV FVASDSLPSVMRVKHI  
SSSYHKEIEELLSEPTSKDFFKRSLHVDPPFTTYTIMKLV TMSMDDVTTTPSSSTA AVFNMTT PFTITQTNSQHV  
IVASQALRIPTTPHIVPAVTGAVLDHELLKQQLFNISSQOCIGQNC DWSYNCWAQERM CVVLD DGGLLMITNQDQ  
HSTRVGQFFGLIDGDLMKALVRDRVYAQVQIDDHQMVCKSDAVDGNAAARNYVFITNILKIFKWLASSIWFVLQT  
FVYITITSASALTTVEFNENEITTPSVELQHCIVRKTIFHFGNQVFPQEGSVECLEHWNRTYQASRI PNSNLIMV  
VVD TGAQCCDENNFCQPIQPEELHFVVRDEI PCSKNRYRAPPSECFDVKSLPENQDTECSSCHI QPNVVMQLIF  
MLFLALILK

>XP\_018673131.1|Ciona\_intestinalis\_CACHD1

MRYLFISTTILFYLIILADAQDLKPNVSVLATYFSSLMKDTLGEVILQKKINNLQFERQRRNGTEFLNQVSTILS  
STILERVTALQNLQAEVLSSSFQGGQEQSWTPCCCKYDMEQLRINVNYKTKVDTDNMCEIISPTSPPFIQSLSSDVL  
AMKLNHQQVPDIKWQYVANEQGVMTVYP SHKI PNCTS IDPRFRPWTETAWPKPKRFLIILLDSSRSMENTFNSKP  
MIDIARELIDILLETLRPNDKISAIGFRHEALRSQGCFRNQLAFASETNKEKLR SFLRNITPMGESSYTVAFQSA  
FOLLEQDYIKYKNSDTEKYVILLISDGQPKEAYGRMQDVYSIIEQQNLKINNSVSI FSYAIGRNADVGI LKNLS  
QVSNHAPSQKGVFAINEVSDVRETISTLNHASNNLSYNDEPIFSSPYIDVGGGLGLIFTVALPIHKPDGDGLYGV  
VAIDLAIQDVFEVVMYFNDDGSYIFIIDNNGRVVYHPFLPNPTQLSNSINFFDINQLERSALVVEVVESMKRGG  
SGNKSTVLNQVLPVGNVHTTQVNVDLFWKPI TGTKFSICLVNVQDSQI ILLQPEKISPWLNNHTTFQYHRLDLS  
SANGEEVCQRFYKTALVSKTSVLFAPRSFSSPFKYESQEETSALVQTYTTFDELLSTTSSLQCDEVLT KHQDIV  
ELFAPGVIADVMWSSFVDELWLQSGENHVSARFVGT SNGVDRIYPGTRLPKNIDVTTRI WYELAVAHPKLCVFS  
PYRDAAGPGNVITISHAIVAKSSKTKNENVIGVVGIDFSLNHLYTILTTLYPNCKEDATIDSWYCILVDQ RGNIV  
LHKDYVNDHEDNIQVKHIASDKELVTLLRDANFINRMRCCLDNKSIYRIWYTLHSNSSLDNTSPINGGECAYFM  
EAVPNTNMFLVVRPNKDWC FNQGCNSPETLCSNNSGAFFGHTWQCPCSY PVGVDDCANTLLVDSNVPTCPDRAQ  
VIPFTECINEKIPKCVSTNCHLSKNASNCTGKVGCTWCYQSSDASSSLASPYCSETEDCYKGVEMARLPGYETKE  
ICQDATASWQRTQTILACVGGCLLLVISFIIILRCLKSRRTVKQNVDHAVYDQVSPSATPIAENVEQT NKVAPR  
APQV IISVVDS DGSEILRKPVQLIQGGV TYGAQQKAANPEVMKNKNPEESKNKRVDTVSDDTSIETENTRNSVA  
SNDVEHIDSPGKRKRLSRADARSRENLSNLEGVEEKFPFDTKPYIPMKQITNELSNSQSSPTLINNKSYCSDL

>TNN15966.1|Schistosoma\_japonicum\_Alpha2Delta

MIFFHILWILLQILVITRSYDDPIRLYHDVKQNFDRWVIELSQSFSELQTVSAEPYLKSIYKTANFESKEINETV  
ATGYLQTAIEKIQNI VNEKSKLVDNIKIAAEEAFVNRDGN EPTGCY YRAKALTIVPPLNETDNC SVKFYIPLKQS  
PQHDNQYVCYNFSAHVPTNVYDLSDKLKRIGNWTTTEL DKVFKLNAQSDPTLKWQYFGSSTGFFRYYPGAMWEIQ  
LDEYRLDFFDCRSQPWYLQASAYPKEMI ILIDKSGSMKGRSDI ISNATAAEI LNTLTENDYFNVMMFSDNTMYAD  
PLITDRLVQATKYNKDKMIKTFRKFTPNGTASYENAI TEVFR LFNKVDENFHTNHKCNRMVMIITDSAPGSY EHL  
FKEFNPQKNVRVFTYLLGQHSSAE EYVQELACLNRGYAVNIATLADVKENVLKYLDVIARSNALQDDAYFVWTGA  
TVHQFNFKKLKRENFTNPYLMNTHSSRSFMNGFMQNMLLEPDPVRI DTMIASKEELPKMYTSAKAVYDKTNKAK  
RLKEGNLLGVAGVDVPLQSFQDTLRGWKIGVNNYLFAVDNNGFVLFHPNYRPVYKALLKSYQNV DINEVEVMKE  
VKIDPWSGTPEYNTTLRNAMINRERTSVDMVNMVVDNYHTT FEVKKKFFISPIDQTPTLGLAIQWDPTTKGY  
PIPEYRFNSQELLRN LHVNDFSCFAPKYGEQNTDCNSHGND S QIGSTIIPYEFCQFNKDLASLYLKDR LCAFRQI  
LLNSSLISRLKCDEEYLSRIYLD AKMTCDSLNYWFKQSKSHLITKWN IQQAFSFHHSGLIRFYNF TTPAYPHFIT  
DHIGGVEDSLYSETVQTSRYLSEDNVLFVHTPPNDLFRHFSSEKLDVPVTLTTSV FREPVKTPMGI IGLQITHSA  
IQNEFNRI TNTCFTGECHVCGSPGFDCYI INQAAMVLVSNVGEKEVQNLKE INCALVEDLVNHSVLNETYLYDF  
QGICIE TVQETPNAGNHLYPPLQFVLKII IWFINETVLFVFGFIDLLSYRIVNGQKWSIYSEPEESIDKEYPDTL  
SSYQSRNPPEDFMVHQNL LLYGIDEKIKNRDSPYHNL PDQHIYESSQLNNAIQSHIYTPEKQPINDNQKHINNKL  
HNRNQDKSIMG TSETTQMTSTSLHNQSEMNLITESILVPELKEEPIDGLFGRIDQDPYDAQLRALTAIETCRKE  
QTAHIQSILDSQSENTITSNTTDEFIN YTDSTTASPINLGSTSIGKGGKLVPGSLLACVHRSVQQRCHSGAGTSS  
FTGRYACEAICEVVRERMPQLANRLEDCKQPLTPCTERFVTYNVVPQNLKFN SVINQVTGTHDISPINEVSSVN  
ELTGEYCSECGRRWLMKRLPNTNLFLLMNIVLSGSQSILCKCNCRKQFRYGARLVIDKSKPRPV TYRKYPPIPS  
KCRMIDDSLVL LLLFYRWRI LQFAQTM

>TNN07107.1|Schistosoma\_japonicum\_Alpha2Delta

MMCSRVTVILFGLFSLNPSGTQKPNIFQNGKQFFGNIFDN SAKKSAFINLYKSELAYRLINLEQFNLSSEVVN  
YAGRIGHVIKTL ENSLKMLVSWTEEEVSKYSWNPKLKSDI IKYNDLRELKPD DKRLVDIPGYQLKIMPNOQSGVHL  
PVEVYGGDPTVFHTLRWTEVLDTIFSTEPNLHFTYFASFTGILRVFPAPFPWREQSVD MFVRRRSWYIQGSSVPK  
DLFILLDTSGSMTGQSLKLANLSAQKLI GALGVDDYFVVAHFPGAKDHVAPMIVTANNESEPICFNSFVQATR RN  
KLRLFYDLSTLKARGYSDFPASLKFAYE IFRNLTGSARGDRGKELRNKILVLMTDNAFV FDES VLSQLKQKSN I  
TTFIYSLGEPVGAAYEHTMKACATNDYYQYLP TVGAVSNLMKDFHDKSTQIRFGPKGSPLPTEVILHGASDVLHT  
NQYKGTGLMVSISMPVYNRTKKLQFLGLMGTELPIDLMMYGLPQSKLYPVGYAFVVNTNGYLVFHPSLIPEYTWL



DDSPYLDVFLDVELNVYGSKTLVRKKLIDNVRGSERIIDFIKVSNDNIHTYVKPRLYSFTRLPNTDFSVAFVTPTDQ  
QLYSNIPKSLKFAIGKDDSGNYLIDVLIIEKLIKARIILPWKALDVYTKTNYHVFSMETDDQHALHHTDDDDDE  
TKDEVPVDEENTNKETMIEDIEQQSNASVLENQTMISLFLNNTFCANDTNCLETSSLLKKRYIRSILPYN  
QNDANHDLVGDTSVVLGTTPTDIEKPSVPSSLPQVGTGTTTLLQYSKFAVSLSTASETDDMFQTTSDFDDELVQTM  
SSDQTPIDATSANIESLIDEVDRQSIESDSSSSSSTITTTTSTTTAFTNDDLIGDSTLDMITDKANVDDNSEGS  
AKWNQLINEQEDEIKNFLEKIQNINSNQSELLSQILLEIIA EKDVAAEADS IKLTS PVRSR TIALNTGLIWTIP  
VNTNEQFYNELKYWPNSPIFQRVYDSHSLIFWVPLRTSEATTKPVDKSFSSGENDESSIPDTSAINDENTNIMM  
EQISDNLLQTMSPNPIIDTSVKDKHTNETSDGKNSDIPNDVSNNDKXVIEIDELFEESSETPVNEDETFEKIQ  
SKNQITDNNGRNTPLPVTIFTPITLTQGGQAYKAGVMGITLEPDYLSEQLNMIPECSIKQANKLCYILEDAANI  
IAVNNKSLYYQIGQFLGYVDPDLMNALLQNHVYGVLDYDFEGTCYPSEDKLETTSPGIHPIPSILMYTQIIFNL  
RMWFDWLLTLGSVSVFITRAFITGMIAIIVSGEPNDDTDPQNKPYQCIELIHRYYSLNSELYDTRNSPINVGFNH  
VFQGFISCSQQRNRDWSVRSISGTNLLLIITDPIFDECKKKAFNERLYRDPVKG

>HBQP01008001.1|Lymnaea\_stagnalis\_Alpha2Delta

MAVLRWIMPISHLSIILSLIYFNISLAKEAPELKDVKKWAQKIDNDLQYLGHLYPILKQKFVKDDGPGIKRIYSE  
VSGQDLVTEMAKSLSVMMHKKMEALRKLVDVAENTAAYKWNKNLVKNMVTYVNTKEVDNLRSSVVYVDRFRKEV  
NFNISCVHIVPEIYDGDIDILNGLNWTASLEEQFKENFNNDPDIWQYFGSHTGFMRTFPTAAWPTTRVDLYDVR  
RQSWYTQGS SSPKMMILIDTSGSTHGQSLQMQNAVKSILDTLGENDFVNIISFAEEATFVSKCFNKSGFVQAN  
FRNKKQMVKDVKISATGQADFSKAIKFVFEQKFEFERNNSNDDKNI GADCNKVI ML L TDGGTDNAEHVFEKYNW  
PNKTVRVFTYAVGPTPNPIHAIRWMACANRGYFSQIPAMGAIRARVQDYV GILARPLALGHVEHDLWTSSHIDTF  
YDSDQDEMEYIPVLSRPQVIKKNKIFEWGNIYEDYMG LGMMTTVTL PVYNRSLGSSNQTI LGVMGIDVTTAKLEA  
MTPFSKIGPNGYSFAINPNGYVVFHPNLQTMGKFMKEPPNIDMLELEIDENNPMLMDLRSDMIDGRTGSKVVKTL  
FLSNQRYVTFDEANYSYTQIENTTFRALALCIPTSQKKYPQFSLQGPVSDLKSLNWSNAHLSFKVFIAPWNYHK  
NMSQQKNLSGTIEDIEHMLSKDSNPDNWNMDLLKHLWDVSTITEDIYVFIQKINNSTEDAFVDWDLNLTLSKEER  
VVFVMTNGGMTLISPASASNSSYFEKNHDPKSSLYQRAQHSSNCIFMADYIEGPRSNTSETPYISMCAVSLTQ  
LPDKPETVFDKPAVIGEWITHDEIMAVLRNKTFSDSLYHCDEPKYLSCYLIDGGFLVATNTETYREDIGRFFGE  
VDPPIFSKLNGMTFTRAVQYDFQAACKQVDDTMSAGFKGFTIPTFNMMFDLLNVGWWT SKVSWAYTSFNLYSWLF  
SPTVEVYADEEEDDERACVKGIEQYIIPNND SYVGSIECQNYTRNFTAVKLDRSNLLFIVTEPIGETSVCHDLY  
KPITQSPKEISAAEEETVICEMAKNSRKRARVYTCYHQDPRENA SECGLSLRATYLS CCLTILLLAWQ TMAEG

>HBQP01008174.1|Lymnaea\_stagnalis\_Alpha2Delta

MELFLMDITSSWRRVALTLLLLVAVAAVLPQTCAGQRVDSEKNITGILNGAETFQRFILTLAKTVTGTGIFNSRH  
PVMSVLPRTSVDVKVMLADV KRKMERLLTEKEVAVKRLKEAAQEA IKNYGPYKEPIDFKEVDYFNAKKLVTDKDI  
ADLDEQLKEDIKKTITYLPTPTWDFKEDEKKPLLNSNTSSIHVPTNIYDKSVQILNGVQWSTNLTDQFVKNKQE  
DPTLTWQYFCSSDGGFFRIYPAMQWPREANRLDTFDCRIRKWIQAASSPKNILILLDSSGSMKGLRF AIARSTVN  
KILETLSD E D YFNVI AFSEEPYVDECFNDTLISASVDNIKRIQEKIDSLEALRNANFEKALTRAFKLFKKEHLE  
YHDHCLCNKAVMIITDGAPENFDSIFDEFNWPNKTVRVFTFLIGKEVPDNRQTRWMACANKGLFTHISTRADVQE  
NVQYIKVLSRPLATSRIAHQVWSPAYLDYVTEQSEIKVPRGKPENMDVDFDME SVYEG LGLVISISMPVYDERE  
RVNPLDKEPEKSLG VVGT D VRINELMKFIPDFKLG LNGYAFAITNHGYVLFHPDYTPFYREKKGSETGHLLKVR  
PKYNSIELSEVELTNYTTTGWNKDHPLRRYLLTSKSGGHNM TAVTILTHSDGMRRARERRNHYQYMEIANTFRLV  
FVIPDGYGTHI IKVENS SVPSQQQVYEDLNKGDQSILSLSNWIFCYDEKTNSYTRLDTDKLM DYLEHGTLFTKCD  
EEHMKRLLADINITGDYAKVWKGSLTNLPQDFQFFFKNEYNACWSSNTNRKNDEEKAHCFAMAHLNFGIGFIWIG  
TSSGLTRHVVIDEIDSHWYTTSSHAIKSSYKMAVDGWEDGYRFVFSGPVVNFPKDFKINDSFVTI STAEIVGQN  
KSAQVPAAVVAFNMKYSAFYNKFAQYLFQCQDASCPTYCNDTEHFQCFLVDSSGYILATNNPDKSGTGMLL GQQN  
GRLMRALLDDSLFKQVQLTDYQSICETLININDSASNFIKNPFRTAARLFLWLLTEVFIIFLSQWTTLVSPQSAAD  
RGSSNLYELKEECGEQIPEPLARFIFCEHV LKNVEDREENVVKMRPCIQTIHRYRLNLGKLLARPRQRMASCAE  
QCSATTKRGSYEALWLN DNTNLV FIVADASCVCNSSNAASDS DENTSTSTVNSSVHPTTRHYHPYFSSRPKELVY  
GEDTQCQILLNFSNELKRVDSTRSNELLCLDASNETDTPCGQSSALSYSQ L T SAVPVLLTVMLIVMTYMCH

>HBQP01007985.1|Lymnaea\_stagnalis\_CACHD1

MATKLAYKRAHRCQMFGANFCRFYTLIIIIILCISHTCLVLSEKQQWIDPSNHHAGRINLRNIDLTDLDPSAKRKI  
GGLSSSDSEDETEYLTDTRQEAVNPTDMGGVVIQQASQDLSARLRWLSNDEIGITNMQAIYDSLPEENARKEHDR  
LEEIVERLVRFRKYLQVLKTNKITVENLYKFHVQKQPITLGYSCCSMECKDFKTHNLYGCKIASHTSCDLIPPSI  
PRGVFNPRNLTEVWRSNAQYFPSLKWQYFISMEGLHNEYPANSFNSACDNTFSGPKDCHNIHDTRHRDVFRLTI  
QPQRKYVIVIMMDHGNSMSPTQLLTAKAITKHLIASFSDNDRIGVIGLSNKPLYPRSDPCLPHTMVPATFETRFYF  
SKFIDNLEKVDTTTNTHTLGFRAFEMIEDLMEAKSISDNMILYVSRGLLSSSLTEAREVMEVVAIHNAKTGHKVI  
INTYATIDDGKTIMYEKSFLKDVAYQNFAYEVQYRLKTPVIRGIMMAINSTQDLSSSVGRFYLPNRTAEDDPV  
FSLPYIDEADRALTMSLSQPCVHTLPDKPDLHHLIGLVGIDLHMEDVAQDVTYYSHADNSYAFIVTSQGYTIMHP  
SFQRPLRTRVQPMHTDIRHFEQHYGFLDIRTAILSQEQGDTTLILRVNTQTGLDGQSILVEHTARYVWKKVDYVP  
FIVVIKSYERKEQKQLKNILMHNQPDLYVHRLDLFPNDKMCYHLKQLSTPDLSTVFLSANSFVNPFEHLSEEET  
KRSVQSYIAYLKDDTRLITNPGLKSQVRNDVSATGRISDEWLRRYKASDLNDYIIRRYVSTPSGVLRTFFPGTLLD  
KMFDPKREWYTRAMEHPGHVTLTSAPLYLDVGGAGYIVTVSHTIFEGKPAALHSPLDKVVAVMGMDITLGYFHKLL  
AANIRPCESKGVRCFMMDDKGYLIAHPGLIDPTGKGPAEQRHITHMEPLVANDILNHRGFVQKKLCNRYNDRTVQ  
RYFNFTSFIGTTLNLVHGEQCARYQITHIPGTNAFLGLVNHTCDTATAFCPCSMYDRLCLNCKRMEQTECEPC  
ECPLEMDFCSGQLLSDDDKNPSCPHDPEREKLALSEAVFKVELEQCFSQCDKRKSKMDCMGVMDCQWCQVQKDG  
KTPLDTPYCASQRVCFGGVGAHSPYGDINVEPDSVEQTGVKSTPVGPVAGGIMGCFLLLALGVYCYRHHVHRH  
SHHYMSTLPDNTNRI SHYYNDEEQDAAEDLSAGECHTNFVLASFENPASVSPYRVNTSYRRPAGGDSHDGYSTMT  
PHEDSEHASMPCLDPLSIGKDRFRPTGHSLSLCKPPVLP PPPQSYRRSRSPTPPQTRLPSTYSVIPEQTVLFP  
SMGPSSVLGMTTVIPEHGPHSVLANVQVHMVDSH

>HBQP01010578.1|Lymnaea\_stagnalis\_vWA

MMWEHTVVLALHFVNLHTPILAYPGEEHPVIGTLAGDVQNWAMLIQNYILQLANDGIMRDATQSFLEATYISEK  
KGGGELVRLVNDLGEYFRKKTSAATALVEKVRELYDEFYEQNQSTNAKFLNDLPPDYYESDIPDKLPKDLAFS  
PYFRQKVSKLNSTIKVADEVPRDDPHVIDAVLFTKKLEETFLONAAKDPLLWQYFGSVTGVTRLFPGREWSTNF  
AGFYDDYDPRVRPWYIQATSGPKDVIILDCSLSMRGEKFSIAKAVAKTVIHTLTKQDYVNVICARNSHWNEVGK  
WHYFDTQVLSQEQRMVPATNAHRKDLIEKIDKLKAGGTTELEKGFDRADFLLRSVPRTGCQSIIVFATDGDKTD  
GEDVRCGPGYYTRSGYVPGPICKYNFTSVYSVAVEKKNYLLPNSSSGEHFPFSQARIFSYLIVEDAEMFPGTLAC  
DHNGSLLKLLTGENLITQMSNYFEFLSAMAVTGSTLWTSPLYLDSWGLGLMITHAVPVTSNKTGKYIGVVGVDATL  
DEIENFLTKHQWGSVYSFLINSKAGVVFHPRPKPSTKLEDPYIPIISGLEQDKDGNPPEFSEIEEAMLQGRSGS  
KVINKARDQKTRTFYYGSIIGTEYSFAFSLASEDMEFRRSQEPKDRSNI GVSYYNLLKMYNTSLLRDKLKGTFEV  
IEVKQNDKYPGLRVSYKHSTIFLAPQSHCDPIRYSYNDLSLEKTLDAHLWINGKDPDVGCDDDNTGQMYNKGIR  
ADVLITYPIEEIWKTRNFESLDQVKWTVNGLRSGVFRTYPGHRSTRNYDPTQRPWYKRTSSAPHKTSVSTPYMDS  
AGVGKINTISQAVFEGMTPKTDEECANFTKGLMGGCHCDVDTDICYIKVCYLSKAKGPNSENRRCATERVEAVTG  
LDILYDDFQKKTLESMQASDFRKSCGQKYTCNGEPDCETRCYLFSSAYLVMDPDLTANALDESQYQTVTLGRK  
EGEVMKHLVYYHKFFKREESIDFQGSKRISADEPKVTL DGLPQTPEDTDDYKNRGKIPKFYNDFGCIQDVVSYR  
ADDAALGPSGMTGNVSGPCMSGLYYVTALPQTNLVLLVIEDWLVIKQSLFYNFHCKITRSVNSGAYRIINGTC  
AHEDTTESTLRDLGKCPKLN DVPLKCFNNTKLLMAHISVLLVTLFSLV

>NP\_001260486.1|Drosophila\_melanogaster\_Ma2/d

MFGLCEKLMTHFAVILTAFSFSQPLLLLLICGPHGGTFPSTSIHWAEASAADEAVGKWATQFGDELFALAQKIKT  
SQEIKEKYKEYNARVELKNGTELIKSIKTNVGRMLARKMDAVRCIQERA EYVNEFENLTYALQNFTYFSSKYS  
TFNGNSSEELEPNEAEFAWMYRNMELNPDTHFYNTPVDTEHSSVHVPSNIWDRSERVLKTIMWSEHLDEVFRQNY  
QSDPALSQYFGSDTGILRHYPAAQWTDTRPNRDDADTYDCRKRSWYIETATCSKDIVILLDHSGMTGFRHHVA  
KFTIRSILDFTSNNDFFTILRYSSEVNDIIPCENFALVQATPENIEVFNQIQEQLDDPEGYANLTLAYETAFQLL  
RKYYSRHCVTNSTCNQAIMLVTDGVAGNTTEVFQKYNWNGENGTSQMDTRVFTYLLGKEVTKVREIQWMACLN  
RGYYSHVQTLDEVHEEVLYVDVIATPLVLQNEQHPPTWTHAFTDKTYDPKTSNEKRPRLMI SVGVPADFDRFYRH  
ANSTNPRARLLGVAGTDVPVEDIDKLTLPYKLVNGYSFVVSNNGYVLLHPDLRPIGTNGKMNPNYNSIDFTEVE  
HLFEDQSPREPGE SILHIRNAMVRHEANEFKSISVKFHYDKMRRVSEEKQDYFFAPLPNTPFTLGI VMPSEYGKT

WIKVGEEVDKNKHKINISDFFIGENWKVHPDWVYCKYHYLEGHEFKTPEAELREFLAKMQNDWKWSEQYAEDES  
DWDDKDDLNCGRKTLGDDAYYCNKELVNLLIFDAKVTNSSYGVWRVFESDEERQLIERFRADLRFVATMSGLTRWQ  
FIFGEVEVDTDREFGDYHTTAIDETWYKSAIQLHHEDRAESFVYSVKYYDDPMEDSEVKVTASHAIFPRDGGKEA  
PACVVGQFQFSHARMWERFFNITAVDHCNHCLPICTDDDDVDCVVIDNNAYIVIGQNINTTGKFFGFEHGDVMTAMV  
ERGIFLSIEVYDYOQCKEKPAGSDGHGLLHPLRLLSLGWKYLVGRLFFEYQRIQWWADGAPFMEYTDIEDEY  
VAVGDGGKSSASKPKDSDDENAMFDEPEPDIYKACDKRSTLYALQPSALVGINDFVEAPSTRPFLVKKIPNSN  
LVLVVVNLMPSSRSVRLTTEPQRMEYDKEFPYKLNMSFYERRRIEECTVHEDEELYTYCGNASRLVLTQLMP  
LTIILVFYLTHSFMR

>NP\_001246304.1|Drosophila\_melanogaster\_Straightjacket

MAWSRLLAWWRLCLGLLSVLVCLAPCVNLQPAENINYNLVHSHWADKLGMEFLHGLGDFITRRKEVQESFKDAKVVS  
RNGASIVDSMAKEIEMMMDLKVSAVRRIMDTAENTALSHQNDMADKMFYSYSAKEMLEPGDPVPIPTPAPDMDK  
DIGEPLIYVQPKVVVLEPRPEFHNTPVNFSVSSVHVVPVNVFDRAPVIKAIQWSENLDQIFRDNYKNDPTLSWQF  
FGSSTGFMRQFPASKWRKDVVDLYDCRLRSWYMEAAATSPKDIVILMDGSGSMLGQRLDIKHVVNTILDTLGTN  
DFVNIFTFDKEVSPVPCFEDTLIQANLGNIRELKEGIELFRPKSIANYTAALTKAFELLEETKLSRGAQCNOA  
IMIIGDGAPENNREVFELHNWRDPYKPVVFTYLIIGKEVANWDDIRWMACENQGYVHLSDTAEVREMLVNIIP  
VMARPLVLGRHDHPVIWSQVYADIEDTKLSDYLDWINDQCEYQKADVLEYWQVHDMLEPSEMHRKRYRRMKETWN  
QPVDSNVYQFMTTVMPIYDRRENANITEEVLINELWELQTRERIANILGVAGTDVPIEKLLSPFTLGVN  
GYAFIVTNGYVLFHPDFRPIFQGYILKPAYNSVDMIEVELLDDDRPARDFNPVLMITRDSIINQSTGSKWMLVK  
NHFDEMKRVARVQRYYWTAIKKTPFTLVISYPEQYGVSHMDIRADQEIHRISIKGTNLRVSVFSGKRWKIHPDWL  
FCKHSNRTFKTPEIELLYFLERMSEPGWRWPGSRSAMPPEHAAAMFCDRQLMQALVFDARVTGWFSNNTSFNSKD  
DKGNEFKQRFVTVAFALATHSGLTRWHEFHNSAAEESGVGETFSQNNTRAIDEIWKRAVDQHFVREESFVYSVP  
FDAGESNSEILVTASHAVFHNEGKGTAPAAVVGQFQHSALYKLFHNITGNACAVDDKDCYILDNNGYVIISTRV  
HETGRFFGEVNGAIMKRLLEENVYRQVTVYDYQAVCFESKNDNNASSMLLSPLFHLLRVGKWLHTALWYIVQLL  
QWAPGVSSHYADMYGDSNDTEPPPEPHPDHARNGNGHGKDDDDHWLRYLTLHRTRLKPCDMKRDLYTLFNEKD  
NVVYNMTAHACERPFVVLPIPFNSLILLVIDQLCPRDGSVVLTVNPQPIDYHLSVNDSLACYKQAREFNMRPHS  
CISRHANESGIKLCGKACSVYANLGLLLLCHILSRWL

>NP\_001097163.3|Drosophila\_melanogaster\_CG4587

MESKHWSCFVAIVLGVLIIFKMHIFVAFADQDEDIPHNEVRNWALKFGVDLWEFGRQFTKMNEIKSRFKDNDIEVK  
RKDGIILLRELAEEVKNFMDFKRNAVMLMDSAEQAALSELEGQGQAESEPMGGQQHYDARRINEYNADGKLADGA  
RHMDIRFMRRFERLPVNLSLSSILVPHGVDLDEPDVKSALQWSGHLDPFQNNLEQDPALSWQYFGSSTGFLRRF  
PGTAWPPEGKSKGLIHDFRTHNWFVQAASSPKDIMILLDASSMTEKSFDLGMATAFNILDTLGEDDFVNLIIF  
SEVVKTPVPCFKDRMVRATPDNIQEIKSAVKAIKLQDTANFTAGLEYAFSLLHKYNQSGAGSQCNQAIMLITEST  
SESHKDVIKQYNWPHMPVRIFTYLIIGSDSGRSNLHDMACSNKGFVQINDYDEARRKVIDYALVMARPMIMYQA  
DHPVHWSPVFVAGKSGGLGRDSEYQRRLVTTVSTPVFDRRNHSVRVANLLGVVGTDVPIEEIRKVIPOHKLGPNG  
YSFIVDNNGRVLYHPDLRPLGDANQYIDQLPKYASVDITELELPETEFGNNEPIEINKNLLNEMRGDMIKPKE  
GETEFTVMNHYDSDKRSTRTHRYFYGPIEDTPFTLAIVLPEKYGSHFVSQQEIRHSRNNVTEYFKGDNRVHP  
DWVYCEYNSVSDLEKERESSGEYSSRDQEPSEFGSPEEQVLHFLSRAGRPGWKWMSVRPKSPQPHHNMHSGSNGGN  
APGSSHFGSQHQSSQGSRKAEPYFCDRALLQSLVRDAMVTDGLDRNTTGSSSGKEDKQGYQKFFVATSFVATRS  
GLLRWIDHVKRPEDTPEPHFSEDNVRAMDTSWYKRAIDQHSVEPDSFVYSVPFGSGYAIKSNATLVTASHAIFVE  
HRGHKAAAGVVGLQFQHDLSLAKHFINITSACTGMTGCKRTCASDNLDCYVLDNSGFVIISEEMEHTGKFFGQIDG  
TIMDSLQDRIYKRVTVNDYQGVCSADNPYTAAGGILKPNRLGSWFFNHLLLSAAWLSLMPASLRAWPQEEYT  
YDNEDEVFVDNNYSDEYEFGENEYMNQVDQEMDEFFTTADVEYTPPPRQHKPHVGPFRFSPDPHNARRCDLRTD  
LYMLQPERLNQGGQNNPLKGLTNCHVSGCERPFVQKIPHSNLILLVVDTLCPGSKQLDIEPLEEAGVIGACS  
TRRQGGQEQESRRRPPKCCINYHPEEIEIQQCGRGSTLLHMSGSVIVAHLLMVTVTFVLANA

>NP\_611469.1|Drosophila\_melanogaster\_CACHD1

MWPNSNLNAVLLILAVLACPTSSQHVPLAMANSTSNQVPTDPGFMPLQQSPGSVFFVHHNQONAMQLRHSMEGKL  
RNIRNTELRVAKIQEIFDSMHFSSAKGASNTRQASSNDSNVVNPQLQRDLQLFSERLSKKIQKATYVVLELRELL  
RYNLTKVWQYSYDDEDESESEMDLEMELEDLHARNTASPTDEHVQLYLNTQIESCQPDYETDLEYGSSSTQSIH  
YNRQQIQILNYLKSDDARATFLNENNARSLAVNGYISNQLVLLKRRLSRSDAENSNSKPISGNHFKHIYFLNSD  
GASASLHFRQLYVSAIKQKQFVFLIDVGSALSALFDLSKSFVHEMLQLEDDTKVSLVTVASEANFMSLEAFPA  
EAGHGIYSATRAHKEEIIISFINSLSRAQAFTNHSLGFEYSFELLHRLQQSGMINTAEQPVEFVYITRGLLTNLS  
AMAVLRVVADGQRRRLRAPVIINTCAVVLDEKRIMYEKQFLNDVASQNYTKYIDVASWWPSGQEASELVGRFYVL  
SKMHAETSLPQTSSRIFGPLFQERYLSDTLEVHPPVVDADSGDVLVSI THAVPPYGVVGNLYLSDLLEDLLNYP  
STTSSAKQGLGYAFLLDIRSTGNTLAHPAFAFRPLIQRETSYPVNIAYLENATDFSSHIRDRLREESGNVTTDVYV  
GRQRLQRTYYWQSVLGFYVLCVSSGGDTLRNVSSSTQRYNLKDTVSNYEPGYGESSMDLLYHRLDLNQQGSAPPK  
TCRYFRQVATMDAPTLFLSAAAFESPFGLHNNRPRQTQLRHVESIMAYLRDSSGLLANMGLRPSIRHEVGVLYQA  
MQQLRRRHQDARGSLRSHVIRRYIASVSGVLQLYPGCLLSSSYDPTRRPWFRQAIAPGKIVSTAPYLDAGGAGY  
IITIAHTIFEGKAHALHSAQQDRPVAVVALDVPYAFYRRLILEGTPICQLPHIKCLLFEHEGYLLAHPMSMLQPAT  
LTKNQRRPHEHLTHKESYLANDMLNHGQLVRKLGCSYQNRTLQRYAFNTSLSSILGNVHGERTKYAIALIRG  
SNLFAAVLNSSCDGGAFPCSTIDRECLNCKRMDQTDCECPCECPMVGDS SSPSSLMYFANYTRQFPYCPPESEH  
FIALPPTTQLLSTLPNCPGSAGICETYSTQRECLGVMGCEWCQLDVDGNSFSTSFCSQASC FNGVLASLTPYGE  
LDEMELLAHNPQREQHAYS AFGPLGGAI VVLMVIGFAICYRHNLD AQTQEHFYVDSVQEENYGLPLSRFNF  
DCKAHDEPPLGGGYDHAS AQRLMHAADISPYHVSSGSSYRRPPNGESDHGYSTMTPHEDSSDQQCFTLAEPLLL  
HDKRHSKSDTMSISTSISSPTNRQQSSSQPNTHPYLSNQPTSKTERYKQVQATPSPCRGTPAGGSVYGQTTLPLE  
GDKTRPHYILAPVTVHRHMETAES

>NP\_001314886.1|Apis\_mellifera\_Apha2Delta

MFLSVKKFVHYGVLLLLLWIKSSYQQEEDI PHNEVKNWALKFGVDLWEFGRQVTMSEIQRKYHDMEAEVVKDGV  
LLVREMAAEVKNMLDFKMNAMRLVESAEQA AVSAPRDGNVSPKYYASQRFDSSSGEGKASITVQETFLSSNRHF  
DHLAVNVTLSTVLLPDGVKQIDREVAAGIQWSEYLDLLFVNNYESDSSLSWQYYGATSGFLRRFPAISWPPVNDR  
AYGADKNRAIRDVYEFRISDWFGAANS PKDLAILIDIECYASERNKRLAVTTVKTI LDTLGPNDYVNIYRYGDT  
AEEIVQCFKDSLVQASPENVHDLKIAMSSMKHEEIP TNISAA LATAFEILHRYNRTGQGSQCNAIMLITADNAG  
LPTEVIKRYNWPMPVRIFTYLIGGDKSPELRNTACANKGFYARITELEDIRSKVFEYVKVLARPMVLYQHEHPI  
HWSPVYVGGKSSRYGKENIGQLM TSVTAPI LDRRNYTVK TANLLGIVGTDVPVEEIQKLVPPYKLG VNGYSFIVD  
NNGRVLYHPDLRPLPGNIDYEETLKPTYISVDLSEVELAEYDGPLHPLNNSLLLDLRDMIDQKEGETNF AIKIH  
YDNMKRVTIRRHNYFYKSI EGT PFSLGLALPEGYGMFELLAEQEI KHAI INVTEYFKGNWVHPDWWYCEYSSA  
SEKWFPSPEERVLHFLTRTRSPGWKMSLRPRSPSSHKQASKPKDAYYCDK KLVQSLVLDALVTDGFNKR GAM  
HKEENQNQGTSTFGVTRSFIA TRSGLFRWHEHQNTEDNTDESPFAEKYARAMDSSWYKRAVDQHSIEPDSFVFS  
VPFNAADSPNPLVTATHAVFIGTGHKAPAAVGLQFQHSSLASRFVNITSTCSGTNCKKNCASDALDCYILDNNG  
FIIISERHEHTGKFFGEIDGTIMDSLVQDR IYRKVTVTDYQGICSPQESHQSSASRTFSESVAKTIAILGNFLWS  
MAFGFNQNLWQVAFAGESVRPLDDSIGQVHEFESLAIDGGGEPTDEPISDGNFRLPTITAATPASPGTTRA  
TSTHHLRTRLRSCEKKT DLYILQPDRLNTSGQSNPLKGLTNCHDTCERPFSVQKI PHTNLI LLVVDTLCPGGS  
KQLSIEPIEALTEPGACIARRERLYRRRPPKCINYPHEEMEIKFCGSANRPFHFFLFIVAVISSTLA

>XP\_003251102.1|Apis\_mellifera\_Apha2Delta

MRPRFLPVIVILILTEALVRGDSISYNTVKTWANKLGFELS QLKGFTNADKFND SYKQAVLKPRDGNALVHEIA  
KDIKAMMESKISAIKRIMDVAETSALSAPDVPPE SFNYTNAKNNTIDLKHS AHFGGQVNLDRSAVHVPTNVYDR  
ASNVIRAIKWSEELDKTFINNYEQDPSLSWQYFGSATGFMRQYPAMNWYMEPVDLFDCTRTRSWYIEAATSPKDIL  
ILIDTSGSMTGIRREIARHVNNILDTLGNDFVNIITFSNVTKEVPCFNDTLVQANLANVRELKRAILNLDT  
KIANFSLALTTAFELLE TYRTEREGARCNAIMLITDGPYNYKEIFETYNWRDNPDEPFKADMPVRMFTYLI GR  
EVADVKEVQWMACANRGYFVHLCTLAEVREEVLKYVPV MARPLVLGRTDHPTI WTPVYADVTDPKMTDWLWEQRE  
SEEQKERFLNLHKKRKL LNSEERDRRFVKKQKSHDQSGDLQEYRLM TSVSI PVFDRRENANITRQVLVNEAYWV  
TETRETRIADLLGVAGTDVPIEEIQKLMMPHLLGVNGYAFIVTNNGFILIH PDLRPVFQGILKPAYNSVDM AEVE  
LMDQDKEPREFDEGIIMLRNDVVNQNGSVTLHTKYHYDDMKRVGRIKRKYDFTGIPKTPFTVIVSLPEHDHTGN  
YRVHATEEIHRSVSGINVS DYFAGTNWRVHPHWLYCKYHYEDERSFNSSEAQLLHFLERTRQPRWKWDMKQPS

QPPEYSATNSGNETHRKSKPTPYKIDKDSYICDRDLLLSLVFDAKVTQWFANLNITREEKAPLARLMNLLPRKTF  
QQRFGVTLAFMATHSGLTRWQDFLLDEEGVI PDDHFSKMY PRAIDDEVVYKRAVEQYVVPESFVFSVP IDEGADN  
TTLVTASRAIFIDTERAKAPVAVVGFQFQHTALQGLFQNI TFSCEGSGKCHTHCGADNWACYLIDNNGYVIAAKD  
KSDAGKFFGELRGPIMSSSLVKEGVFERIRIFDYQAVCFKSTQTSNDGSILLAPWKHAQKMI SWLVGQAVWAWAKA  
GIWESEYAYAYPNEDEDIHEEYQDNDQEKPPITEKLFQKVLINRTRPEACDQEVYLYLRNASFDMFDIDSDVKK  
DCMRPYIIQPVNYSNMLLLVVNTACTETTMPPLSVIPQEI IYENNSLVCQKALISLKRKRQPQSCIRSHSRESEIK  
DLCGLASNVTPNIYLFLLSITCSLIQRIDLQGH

>XP\_006567860.1|Apis\_mellifera\_Apha2Delta

MERIFDNRLIILAICLLCTDCLAKDSYIVTRWAEILGAELWELAEKVARPEELLSKYKAMNTRVENKSGEKLVN  
IISENVGRMLRRKMDAVTCIRMAAEEYAENWENDEEGNFTYVSGKYSQVMNTNRTRPRI PKNMKKNIDAYRKMEL  
TSDSHFYNI PVNTSFSSVHIPTNVYDMSPPVNDIKKTEILDNI FRQNYESDPALSWQYFGSVTGMLRQYPAMEW  
KTNPTLEISADKAEDDEKSEDKDNKDEEEEEDEKEEADIYDCRVRSWFIEAATCSKDMVILMDTSGSMTGMGKT  
IARTTVSVILDTLSNNDFVTVLSYANETYDVVPCFKDMLIQATPENVDTFKKALIDVKTEGLANL TEAFTKAFSL  
LNTYRETRGCGADTPCNQLIMLVTDGVPGNL TEVFKTWNWRENDTHIPVRVFTYLLGKEVTKVREIQWMACLNRG  
YYTHVHTLEEVEQVLKYIPVVARPMVLQEVVHPIVWTHAYADITNPALATWLWLVMQHHEEQKRLQKHLKGRRL  
GVQINEDDFYIQQLDKDEDVRQDASLLNTTAWQEYRLLTSVGTVPVDRKGNRNNRTRMANLLGVAGTDVPI DDIR  
KLTLPYKLGVNGYAFIVSNNGYVILHPDLRPVFKGKLNYSVDL TEVEILDDGRGPRNPGPEVLELRGALVDH  
KSGSLKSVPVKLHYDNNRRI LEKRDYYPAPLPGT PFGGLAVAMSSSNYKGTWIKVGD EIRRNQNMVNI SEFFVG  
NNWRVHPSWVYCRYHYLEGHEFDNPEEELRHFLNLLNKPGWKWSEQYEAYQIDVNETNYVPNCGRQTL SHDDYYC  
NKELMQLLVFDKATNASFNNDFVLD DARTRNLT HVYGVFLRFVATQSGLTRWHYLD TNKLPEDNDGIVFGDLHR  
KAVNEPWYKAAIFQNTLDPNSISL SVPWEAGPD AIVTVS IGLFPKDGKRAAAAVIGFQMPMTNLHDKFIELTSK  
SNNSTLMNCAHVWIDCYLLDQNGFVVI SEAHNNTGQFMGTQEGAVMSSMVGQGLYNPIE IYDYQAWCEEVRIEAA  
ANTLTDPLVYIWKLLWILLRFTWFTTQFVNLPISYAKVHFDEADAPPPPPRPLYHYPCDQKRILYMMNTTIA  
SQGITNHSDYCSRPFYARRVPHTNLLLVVDSMYPTCYKRLEVTPVNISP LEYTNGTESAPCHKIPLNDLKRRL  
EGCFTEHPLEYEIEDCGGASGLTVSLLL FSTAIARILYTFV

>XP\_006566667.2|Apis\_mellifera\_CACHD1

MSQFVKRIILLGFAITMLINVHSSAEDTNANTKCQFGKTLRKQVNAEPLNGTCLRDIVIRLSNEFRSITDAELG  
LKPQKMLGEIEFMNVSSSLNMKLNLLVDKLNKLLSYAKVLKQSYNIIQPI LAKNENLFEYSESTNGLDLVSN  
LADFCSQIAQELAIHLRNQEWKNLHLLPFMYPVTMCGPPSAGHNIGPLLSQYCPKKNVLLLIEHAMFMSEGDI  
LAQITAETIIDMLS YTDHVNVI GLSNSSIHCKDGLLKATDVNKFQLSRYIHSLNRIETNDTIEFDNKLQHV  
GEIVFIHLTNTLKLTSHLRKIKNMISTEKVNGYIKTILILSDQESHSNIKNYNDIVTLPTQNILGFEVSKLFSNL  
KCEDHKKDYLLSDPYFDLYSKTMTLSIGHITNKALISLDIKLRNFLDDITYFNAGAHVYAVLFDNKGIVWISKD  
FPRMETIIDQPLRVHLHHIENISYETVKIMIEEYEGVINVKTQLGKQKWRWKHLTYTDLIVCLISATNESTLSI  
AKLVPTLSMNI LHHRLDLLMHSFADKEILCTYHNKLLSLSMGVVYLS PWCQSPTEQLKLETTGTAVTMQSYMAY  
LKDLTGLLANPGLHQSVRPDVAMLTQMLAYFKIRHIESALNKFI IRRYIIGVVSGLVEIYPGIMLDSGFDPKRRT  
WYGKALEHPGKLVFTSPYLGAGGSGYIVTLSHTIHRNSESIIKDDAIAIVSMDVALGFISRLKEMFPFCNNLTV  
KCFMLDDKGYLVSHPALLEPTGKIEQQHLTHKELLVANDILNHEL FVKKKACINYL DGTVQRYQFNTSLDEILT  
NIVHGEHCVKYQVAAVPGTNI FLGIVNVT CNLLRAFPCPSTMDRSLNCKRMEQTECECPCECALYYSNCAEYTI  
NEINLEPCPAPYEQGGNSQMSWIQSTNLKTCPSIDCKIFKMENDCLGIIGCQWCHIDNDGETPLQVPFCSDMSVC  
FRGILGSFMP LSGTYNSQSTEEITIH EWPSVGPVAGGILAFLLILGLMLFCYRLRSVQSGLEHQCLHIHTSPDM  
LRMTHLEGDAEPMELEQTKNLDSLIRDGIEPISPYRVSSNYRKPPGGSDHGYSTMTPHDDSEQQTFAEPLLV  
GNNTEPDLRRQSICLPSPI THLGS HHVLA PVTVHCNMEANFC

>NP\_001040851.1|Caenorhabditis\_elegans\_unc-36

MRVVHLLVVLATYVSTTSSFNKESIKECAKVLSEHMKETFSKISHETILKQNYEKLVEEEQFD PRAELKSKHRI  
EDYLVKRSQFAYKAKISLEARSVRNDSTVNDPQSKSFI RFMSAQGNDGTTIYESNHLGKRLKVN ETKSFNLTQN  
ANFYTLPTSSVSSAVHIPTPLYDRNEDLLRKIDWSDIDAVYRTNREETKDLAFQLFCSEAGYMRYP AASWFDWN

QDEHLDFDCRNTEWYINSATNSKNVLIMLDMMSGMLGQRYEVAKQTTEAILETLSHNDYFNIMTFSKNTFLLDG  
CNGTNGLLQATMRNKKALRRKMDTYQSEGKAEYEKALPLAFSVLLDLKGSYALYTKEEMSMMSANATNEYQFHLE  
LPEHVLAATKQYIDSINNGGGDNNRGACENVIMLITDAPNAYKKIFDMYNADKKVRVFTFLVGDEAIDFNEVRE  
MACNNRGYMVHVANMADVDEKIHYYIRMSRVVGRHYKESGQLSWWTGVYRERLYLPRPEIFAEPVPIITNQSFV  
MNKMASRRKIRLQKSEARSRMFVTTVSYPVIVNETFMGVAAVNIPLTEVAQKSHPANIGSKSYFFMLDQNGFVMT  
HPQLRPIDPFTKYHKQNYNNMDLLELEVQONQNVRSQSQSQAVSDLVCEGANYAECVDDLKAVRKMIDCDNS  
DVQQLDVLYATELLDRVYPQNTNTYYAECINHANFVLGLAVAKGDDYRVVKKQKKYDFGRVKMDWMDKRWRLPH  
WRYCFLNDTDTHMSKEEAFEIYAQQMSDSGKAPLLCEYRRNLVEKLLLDMEATSNLIDSWDTQFNFMKNNLIHLA  
FFATPSGMIRYNYLTLQDYDYIDPYWSIFEHIGHLLSIEHAQESYNHFITDLNRKSTDDRYRRAVRMKDITMFD  
VSNNSKIWYKSETQLTGYGLNENLTM LGQAFKAIYLDKAVLGVSGFEFAYDHVVDTMAEHGCPASDDRKWCVLLD  
EHAYVFFSNQNDISYEDYLVGKGHISQYFGGLNRIAQRAMALLVENKFYTKLTYTDNQAVCKAEKVVTTSGNRL  
RPFYPIFRFLMQTFNFMVRLASQISGGFLIWLPNIQFTEAYTASFHEGTDVYPCPKQSSFYFSNKDGNRPGTTH  
LVNGNRSERPCKMNAKCSVKMEASFVDGTNLVMVWITQDKASENCYDESECSMEISNQVPPFGFEEVKNEETCEEN  
EKRKSKANDVCYSIDDDSENERRPCSTSPPTIVSIFQILFGVFLHFCIF

>NP\_001022363.1|Caenorhabditis\_elegans\_TAG-180

MGYVHVVLFWLSLSQLPVDTIEEAPASIAQFSANILRDFETQSRFSLVQEEFEKLPDIKSKKEDAAEKL RVATE  
HLDRLVNTRVDALKKLASSAEASA AVFDEYDDQAYAVPQADKRCEAYMKKMNESDMHFVSNMVEHNSKSGIHITV  
ESYQCDPRVMRDFDWTGTHLEKTMSDNKEKAPEMGHQYIGTYSGLTRMYPRRHVKVEPTPITIDLDFRFRPWF  
VNAESVPKDIVFLLDYSGSVKGPMTMLHIKITMMYILSTLSPNDYFFGVYFNNHFNPIISCANRTFMPATTSNKKV  
FFEELGMLEEKDQAHFATPLKFSLDVLRGNLDSNQSLFADYRSEGHKLLIIFTDGVDEWPHQILDEEFQTRNSEL  
IRIFGFSMGYGTSLPLPQQYMACKSHGGYSEIDSIMDVK PQSRTIQNVLSQVRGDELKGTNAEKREPSWTQLYME  
TQGTGPIVTLSPILTSEQRIWRDQKLAGVVAIDISIKEFTKHLPTSSEQMYGYIVDNNGLMIYHPQLQIPKTEV  
HCVRRSACYDAQQVKQKAGSGLRVHYGFSDEVRYRLVGLIDS IPTLDMYDLEGDSTAIRDLRRRITTKTCYEEAI  
KDNSKEYHCSHIKDS PFTLVIVNNIQLKTVYYDDSVQELGLTDNKLVTFFYPRRDVCQWKLDEYAAHDRFRVWSD  
ISEKEICAQDDMLPRAFTKGLGSWTQSWPKSDIEHTTCLLAQYPENASVPHYVNSFVHTRSKLTA FYPTCSSHD  
MKAVNKKFDEEIKLTDNNDVQFQSMRSESLLIYRTIADYDNNRLAVVGTQWKENFFDQYFDNFTRQNPDWKICRK  
QECSII TRNGHVIASSAHRAPAH LAKFDPQLFESLVKVN LVSTNSWTEVQSECKAKRVAPWSSAAPGSSSILRYF  
VTSIFKLAKTSFWRNLLLESALT LVDAQPSMTGNTCTFQIKPFERCFMKFFHYRMTLNI TKQLQLTGMSTCSRYA  
KLYVPHTTSLI IADRACSQYRPKRI FESEPRKLEKCDVVHSHARRRPDALNDWKIDLQNKHVDCINDVMHHAK  
SYFSIVLLILISTFRIF

>XP\_001630741.2|Nematostella\_vectensis\_Alpha2Delta

MAERRASIHLLTRCFSLAIFLFFFN SVKSTEFKQMVSEWANVVG IQTYHFTKNVTYGLDLQNR YETLNVSTIQ  
VEWRPLLTWSKTNMEEYFHKKIDALKTIVEKAEDAYCKHKYNRDLSVEVDYPNSKKLQPYLNDSGVSLEQSOLF  
KKEVTYNRSVIHIPTDVYDGSVEILNGLKWSEALNEAFTENQKNDPTLAWQYFGHDNGFMRVYPGSAWNQPNGQV  
DLYDARKRIWYIQGATSPKDVIMVDASGSMRGVPMRIAKLSAMALIDTFEDNDFFNVISFNITRRVLLCNKTKG  
LVQATKKNKEMAKLLVEGILDGNMAI WREGVKEAFRLLEKARKNRQGSDCQALMIFSDGTNTLEDLYNELNPD  
KRVRVFTFPVGPPEASTTAMLMARQNRGFFSRIQSIGAVRVVSESYIRVLSRPMAMAPKNTSESVIWTSVYLD  
AIGLGMVVTGTLPVFYRPTVNKNCSTALKQSTDHLIGVVGTDVPLDKLNEFFLRPLVGPNA YMFGINNNGLVAFH  
PRLKTVYGYLANAPGVDLMDVEIPLTSSNLKQLRDAMINQTFNTNKGPSQATLEVYDVSTDELRVSKRTFNIYH  
ESLHKTPFSFAIATSDFGFKYSHHNVSGLM SKIEELLKASDINLEKWPYCPGTVKSDDPVQVLKAMNSSKMSSTC  
NSDMLTGLAVDL DATSGMNALWAANQAKYNSDN IKNIFVRTNYGVMRTYSPSGATPYVPNTVEYGRAVAENVRDQ  
IISYSPYYS GKKNRNSTTVRAYEKLVYSSKPVAVAGYDMDSDSFADMAFEGTKTCASGNCADVNC DRQGS THE  
GLYCYLLDENAFIVASNDKSSGMFFGKVDNAVMELLVDHYGNETTAVFKKVFRDYQAVTETKKG TGSSGSLL  
SPLFELSSLDWWRSKAVMFFMYFNVYNWLYSETKPFADANEDVPKNLSCVKDLTTYYTEKTTVLANGTSQCKSS  
SCRSYIVASVPYSNLHLVVDAKCGQCQDKYVSLGIPGEAPALDITNDESPCQSPLYRKRPRGRCFETTPESGY  
LAGRGSLSHSPSIYLFGCIFLMAILLMRDST

>XP\_032219912.1||Nematostella\_vectensis\_Alpha2Delta

MADVPRTLAILTLLACVFLSGTHSQLSYSRAKQWADEIGRNITAFVKTKTQFDTLKAEYDNYEKKDFKFNLQSR  
DGPAMAQAMKQHLEQVLRTKIQSVQTL SQMAEELNANYTYDSSLTVDNFKFYDSKYLEEADNFTLVEVPTFASIP  
VNMTYSTVHVPTDVYKGSKVI LNSAKWTEGLDKYFRENMEKEPSLLWQLAGTSTGVYRAYPGYKWRTPNDKMYD  
HRRRGWYIQGSSSPKDMVILLDLSGSMTGSKIAIVKLAATYLLDTLQENDFVNVVFNKKAYMLCEYLTSDETKL  
DQVKGVNLGNCNDTLLQATYQNKKY LKNLVTYVWATEVANVDMGFVKAVEVLKKARNNNQTSSGCIQTINFFTDG  
VEDVVKTKTNDFLDDPEIQKLGIRVFGYLVGREKGSYPKPVQDIACRNKGYFYTIETLSDVRENI SPYMTVLGRP  
QGLSRDRNLT SWTPIYRDGGGLGLMITVVAPIFDRRNKNNLLGVVGT DVALPQLTASVFPHEVGANGYGFATNNN  
GFILFHPLLKEGDNPPNLDLADVELKNANLDQLSRSMIDRLTGNVTLKNHRLISKDLKRISPQREYHIFFFEING  
TSYSSAVAIPTSSLYKMKFGTEYLGSKDDLKSVQGTLTQVASWKICEGIVPFARNNTPRYIPTYASWQDIISNI  
YNDITKAKDLCDESLFSLHMFDASTTSKLVNEWNVVENDTSGVLSV FVGTSGGMVRS LAPGQVDP PVS RDMTREP  
VYERAADSPGTIVISAPYKHPDDKTEDDKVLNASIALTINKSGKSTVAAVVGIQMKDDAILQNIISGTEACADNE  
THSCYLIDEDAYVVASNQDSAKQEVGKSF GAVYGQVMEKMNESLFRFYFDDIQAKCSKQONTASSAMRHLNPL  
MALSSYAIWWTQSLIWTLAQFNVFLSFSKTQVLAEDDPSMISCTKRIQFFKANPDAMKNGYNPPNVD SAIDCNS  
DRVDCFKPYFLATAVPDNLVIVKHC SKCRKMKMSTLPQQVENAPFTPPSERYRRLPQLKCYASSEFEDKTCS  
SVSSVTPLTHLLFASLLVFMWLLR

>XP\_032223051.1|Nematostella\_vectensis\_CACHD1

MKLGDMRLLVLGLCGCFVLVLGHTNTQNCNMQLLASQVSAQLHATFESNLHAAKLQKLYQNV EFSNAPSTNPHD  
ILQAIARGIEHKLNETINALLNAKTAVTNTGASNTRIIECCAMP AIARANYSYRFRAMLNTSVACKTRNPKDSGI  
IQGENSLVNTFRNNLVDSSVISWQYFGTSTGNYLQFPASGKVCNGSSSFDPFQSWYVEAVTRMRTNIVVVIDRS  
SSMSTAGRMALARQA AVTVLDTLGPNDKVG VVAFSHFIIKPPGCFGGNVAEALPKNINRIKAWVEALT PRGATKY  
VPALAAAFEMLGGVSHSNRSR SAENMILFLTDGDPFDRNP DVSIFEAIRIGQRKLAFPARINVYGLGESLNI DNL  
NRLKQIASLNGTFTQINDQDASSLSTIMGKYTSTAKTREDSPAISVPHLIKDLGLVVTLSLAVKSRHGNVSGV  
VAVDAPLDTLMKEVVHFSTTGLPYAIVVDNKGRTLLHPNAPAPT DHLTAPT FQPLTLYEPFLT PDMYRNITSGTP  
GSERIQTSILLSRGDPLTDGVTKVVINATYTWQPV RGGVYTIILVTSNRMDARFLEKATGLLSTVHSYYHRLDLS  
WQNTALSRTPSVCR TDGNLIAPLSSTVKIAPEAFNDSARYVNTPETQHDVEAIERFFNDLSQQVKYSDLSEHARV  
DVLLTAQLENQWNE SRHRDPDTVKWRYIGTEGGVFRVFPGLRMNKTYSHKRQPWYRRAIANAGRLTVSRASLGKH  
LRHHGNAMISVGKTF TSKRSDWMVTEPVAGVTGLDMTIDAFREMLDYTRERCAIDSQDCYIMDDSGFLVIDIRAR  
SLVVS RHVTGVFPWLAVKLT SVAGLVEPQWCNNLEDLRSQLYTIHLPLNSSKSAPDAEPCRQFSLDLVPHTNVF  
LLSVTSRDGLVCNESPD PSCRCQVACTSCTGQVNPCQCPCSCMKYDECTNSITGLWTGT PCPAPLPPLFDTAVG  
RQLKLEALRAVAPCPKPCYT LTTESDCNTSTSCHWCSSAATPKCSPVCRTNKRLTLKVLYPCNDFLYLTPSQQGE  
VLQAFRDILYRNITKLTAKGLGTTTLTSEGITLTLTYGTTAGTPVELSRDQIYDLVDKKELRIGPTVSVQRSYSPA  
KYKDYTNVNVELLAQNNIDMKSLNDSQKKELFNNLQDSINGLLGN SPASCLWHTDIKQDTILFSLTNHGDTSYSP  
IKTTIALLRNFVAKQQLR LFLVPARGGSKWTVQ NITFNATFDYICHPPNTTQPPATTTRMKT DAPGVPEKPSDN  
SILTHPSPDHSRPTPHDPIATKGLAPRDI FIVVITALGGTAMCLILFFAYRRRRRKRLAPSPSPEVDEDLPSDV  
SRITDIEFDISEAKESKVSSVTGKDATARRESRVIEQPVWSSQSLQDNTLSSLDNTMEQRDVQTNLDSNYPGKYR  
RKNVWKIKVLAARLEENARRKNKQTSEITSTRNEQLESETLSKHNPKIDKSQQFQDSLQAHYTRHQQSLTVDP  
MGDDNDQQLSSPRHAQRSRKVSTELNNDTGQMLQIKHAPSTTVTPHRI LKYSDDGFNQSQFTKDVPRNVFRET D  
FAMTTRPHGKRRQSLNEMQREPPRRPV RHSSQMASGVFVAETGMKRSSLTDHKKYRDIEKPKAEWGQQRRASLL  
TKKPSALDF

>XP\_032221260.1|Nematostella\_vectensis\_CACHD1

MKETRIKVILGVLLMLYLIKDTSTTLQ TAPGELAKKLAELAINGLGTSEMQGYDKLTFKSLDL DGNSILNDLAT  
RFANKLQTKVTIARKIKDAVEVSYAKSATVTSRTECKADTRWLKYDSRFRTKVNLD EMCV IISGAASSNPKQLQ  
DNVLQTMKQNIENNPTLTWQYFGSEEGLYTNYPMIRDSSSCSSYDPRYRPWYVEAASPQPKDVILVVDYSGSMGG  
SRLPIAKEAAKT VLDLTLNPRDRVAFLAFESGVRRVKVTS GDAKDEKCFESSLAKASPVNIDILKKFLDGEYASGG  
TMYAIAFNAAF DILDKYKEKNTTRRPVILFMTDGAPND DPGTILNTVKTRNQGLSTKADILTFGMGGGISPAGV  
DLLQSLAEQTL DGGAVGRYTPVTDVSNLRNRMATYYSAFSRKEDDKPIFSVPYVDTLGLGLLTSITFPCYHQKF  
IGVAGTDVVMSELLADVTFYFNQGGQASYAFVADSSGRTMMHP LLPKPSDPYQAPFFLDIRDLEPEGNFSDIIFSGI

KSQTPGSLFLTSSRFLARGGSIYDGVTTKAIPSMYYWKPI PNTNFTLGI VVKKDVKNYITDAVKKPEGFKFVYHR  
LDLSLPTTTCQYFSRYGVKDKAIVKFGPQAFKNPYEYLGNEETDKTVAEYVKYFDGGTSEKFKESIRNTVYVTQM  
AETIWGKSNTGLSQYVWVRYIGTRDGVFRMMPGAALPKNF DATTRPLYISAQSNIDKLALSKPYVDAAGAGLVIT  
AAQTI FKVRENQHATADDVIAVMGADFFLPYFKKILGDTYPLCKSSSYTCFVMDRSGFLIYHDTFMTSSITARDL  
NLAHVTDKEKLV AQDMIQRGLLERKHCNRMASIKTVNFYDVRVTTGVDYTATYLSCSANYNIFPISGSNAFLGLV  
RKTGSCYSNGALCSCSSDKERTCSYISPDCQCPCSSSTLDFNYCDSEYPPSNVSI CAVPAEALLTSEEKQACVPRD  
LQKCYDPKCSEKTTEGACEGVGCSWCVRDGDGASLSNPFCSPIDEC FAGTKGAKSPGAGEGNYCKSTSDGNKSS  
GSSGLSGGAIAGIIIAVIIVLIAIIVGVVLYKKIHKKKPSARPKPADASSAPPIQPAVDFKPGVAPPTVNANAPY  
PPYNQQAAPPYPAYNPQYLPPGEYNPGYQ

>QJU69482.1|Nematostella\_vectensis\_vWA

MPALGNVMILLAVCLLITDAKPLDKVIVESWAQKVEGYLLKLAEEGLKTKELQREYDKAVYTVENKDGLETIKSV  
KDLLGNYFVKKEQA AKKLAEEVAELHDKFYTNSKLQHNAKVTNLKD LGVDHYTDKDIVKTL PDLEFDTL FKM RV S  
KSKSAIKISDQVVRNDKNLIETVYWSSKLDDEMFKKNLADDP ELRWQNFSGSVEGVLRQYPSSEWQTNFAGFHI DYD  
PRMRPWYIGATSGPKDIVIILDCSLSMKGKRLRMAKEIAKT VLNLT LTKQDFVNVICGHASNWDEVGK WYQYDTEV  
LSCQKDR LVPASTSHRKDLTEKINNLQAGGTSELKAAFKKAFELLKGRAKTGCQSIIIFVTDGEDNDGDPEVRCGQ  
GYYTRSGYVPGQLCKYDWAQVWNEVEAINKYMNPRTRIFSYLTNDKGEEFPGKLSCDNNGYMKRLVDNENIISQM  
QEYYSFLASNTISINNVTWTAPYLDASGLGLMVTVAMPVTSKLTNRTIGVVGIDATLEEIENILQNDQWGSVYAF  
LINDEGETIFHPLL RPSTELVDDPIFIQISDLEQRDGEPEKFSKVQEAMMDGKTGSYRIENAIRSIPKGFQDGV  
VLVTSPSTYFYTSIKDSVYAFANLADSDVDFRRPLRPKNQSDGQILYYSYLEAYNLSSVRKELGGLYDKLDVKY  
NLPAYPNIIYISLDRPSVMLAPKTYCHPNDYLFHYNISTIAVEAHRIINGITNSTGCPNSMFNAAVRPDVMVT SKM  
ESIWLKRNHETLKDVRWTVYVTRSGVFIALPGHRTRRNYDPTRRPWYQRTL VNP AKTAVSNAYMDDSGIGKVITI  
SQAVFQGIPT EKPNC SGVHNL RGGCRCVSHRQCLSGKCRS YSANRTL CAGDRVEAVTALDVL YRDFHRRVYELMT  
APDGERSCGANYTCPDGIHTCQTKCYLVDNLANLVTDPSFLT VSTTDEREYKRVSLGRKEGDVMKRLIQRGIFQQ  
NLRIDFQGVCSVSPYAPKVTL EGLLKTPEQEDDYKNGKPIPPFRNEYGCIQDVVGY SADD S ALGADGII S GSVE  
GPCRSGNYFITALPQTNLYLLVIENWSEHRQSYFYNFNCHISNRVYDAGAFRIVNGTCAHIETKVPLNTKKKCPG  
LRNVKLKCSYNSGITFSIPCLQTLLFIGMILWKIEW

> evg1039955|Trichoplax\_adhaerens\_Alpha2DeltaA

MMSQQRKFLTTVAFLAFIGIFNSHVIRGQQFNLENINLWADQIGNELNRIGYEILDNLKIENIYQKQDLYVQNLN  
GSFLIQQLARNLRET FSTKVAALQNLVDAVQILANDKLTNLTEL RQQHYDLSLSSNITSELTMTYSTKFKTLINS  
SLSVIQIPTNVYSGSRSILATIEYTKNLNDYFIENYNNDPNLRNQYFGGNDGVFRTFPGRPWPKDESGIVLYDCR  
QRGWYILGSDSPKNVILIDRSGSMRGMPLAIAKWGTSNLLDTLNQNDFFTILTFNESITPVIDCYTNLIQATDE  
NKKLYKTYLEKFTDGGRADFNHSYAMAFDLLQNAKTQSFRHS AKQEAIVLFTDGAAQYTEKLLAERNSEKKIRI  
ITFVVGPFYDTPVPIEKLTC EYNGFLGKIPSMGEVGD AIRQYTEVMNRPLLNDKNHPVKWTSVYWDKLGMLVTT  
AVMPAFRFNLTA SLNPEQLLGV MATDVPIEMFQQCVPHLLLPNGYAFVIDNNGLVLFHFGIRATDGYIDNPPPV  
DIIHIEYGSRIEELRKAMIDRLSGSMTMETKLLYRNYEKGGQGVVKRMTYHFMPVVNTSYSVAIAIEDNTGIPISN  
SCYSKGLEYLNNMTKSEITTKILDWLHCHGDNLHQSSKYDKKFSKNCYHEVTGGLIKSKQDFDKYCNQALFKQLL  
QDAHSVDTLKPQPALQDDAVANREGICDTFISTFSGLTKYYTLISGQRCCSILGSRQCLEKNGIEVKNTSRQD  
HLYDRIVSEL SVNQSLFTYRLQHRIGTYYSFLVTKPIIIGKSNKFLRAVAGMEMTFRFRSIIITSVPLL NENPTL  
NCFNLTNKNKGMTCFILDENAFVLDTNLEIAEIGKSLAIVDNQLLESLIAHDVYTRNIIWDYQGVCSNAQTSNSA  
SRIMNPVISVFNYFSIFTTSFFSFLT NFNMASVLT YLGSFLY GKADGAYIDIRPDNRSCMYIRQFILAGTHATSR  
IAGNITCNSDNSTRAFFISPINNTNLKLVIVEESKSEL CNNSV VYSPSTVATAEQIKNRTCTEDGN YRKGPEFC  
FKKITPVPTKGCSSALANFN RNDILLCCILAVLLNFIAM

>evg1036181|Trichoplax\_adhaerens\_Alpha2DeltaB

MQLLTATLILFIFSTLGGQWLTNDRVEIWALKLSTELYTLSESLTTVENIVQAYEAKNVSAVSLNASDIASQFR  
QRLGGLLSSKVDALDELINVAEKAYS DYKYND SLKPGDVQWYNAKKILLNSTDPVFICNDRFQRSVNANISAIQV  
PTNVYDGGVNLNAIEWSNAVDAQFNKNYYSDKTIKWQYFGSATGFFRLHPGAIWRDYN SNGQDLYDCRKR PWYI



SSSSTAKDVILLDVS GSMHGMPLDIAKISIQSLIRTFGENDFLNIVFFNKDINLSIPCFKDVVQTSSESHKYVFG  
RALAANILDGGIADFSKAYDYAFQMLQRSRSKQEQKRCHQLIMVFSDBGTEERPKAVFDKYNADKQISVITYGIGT  
VTSRFEALRWMACYNKGFIRISNVGAI PDNIQKYLTILSNPTALTKENYFTWSP IYTDVSGLG LLLTTVAAPVFF  
RPNVSTYNQSEN YLLGVMGSDVPLRDVNATIPYNLLGSNSYCFGVDNNGRIFFHPIIGEQRGYLSDPPDLQMHDL  
EIVHGNILVQNVTAGGKVVVEFKIRYNEQLRKNMLSRLTGMMYVTTTVHLSNSKRVMYMERQYHYGPVLNDSFSFG  
TVLPKEGCFNFETALTNQEKTEGLALLNSRTRSPLFLQIWRYCSLYSQDESDILFVQRPTLEISNISGI INRISE  
LVFSPNAGFDECSKDLANRLVLDAILLQQLLEDYWTKIAREHAKRNYIFRTFYGSSSGLTKLYQGGSFQCKESLS  
GDCAISEVPSIPKNTIMADYYRLAVAQINANSFVYLANLDRSSLSVASIEVVKAISLEEDANVGVVGFQMNSVLL  
FQILIEVIPECITNNSLR CYILDRNGYVVMFARKRMAFHSHKVQIPVREGK FVGVYEPAVVTSLIDKKIMTREEF  
VTYNQLCNGQKPVNTYTIASSASQILTPFRLSFKILMGWLAQLSTTIIHLASVFQYWISSTSGVCDAPQSKNASI  
YTCALLNNLYIINQNTTTHNGTGICSSCSR PYVISSIPDSNLYLLVINDTETCNCQPIALESKQIFFDHCQQLHL  
FRKEPSYCSKVATESLATAQVCNKAVTSASINIISILLAILVQQMMN

>evg1038414|Trichoplax\_adhaerens\_CACHD1

MKISIDRKS NLSIRILIIIGLVVPYQAVTLNHDKGWATTLGEE MVFTEKILSPGKIQRFYDGDIDYQQNLTS AV  
AIVEDLRRQLNASLADI IKFVQSAKSNIESGYSSKQAQSSTSYQLCCNPINLRFNKELNDKINLSSPCITFPVET  
TQSYIPNSLKLAYRQNFADNLSVKWQYFAGADNI FYQYPTTQRYCKTNYTTETKFKQWYVNAASPSKRLVLVLD  
RSGSMSGDRFLKVKEAATAVLDLSLGNDEIGVIAFDDEIRIHGGCKVTTVSPATPQSIIFLKDFINNKIQPEFGS  
TGYVPALKHAFDMLSTNMTSKAKTKTNLIVFLTDGHPDEPESQILDVIKRNREALNNSVLI FTYGFGNLNDGRS  
LLTKMATQNHDFSWGNPIKYPKPYGPNGTMTYLMDYSGHRLRNQMGTYYMNLREYSIDIQYTVPYDITLGSGLF  
FTMSIACYDSNELIGVVASDVSLIELFQRLPYFRYGKYSYAFLIDKQGRLLIHPKQAYATKSNPMPSILQLETME  
PEFIQVAGIDTILDGEGGEISVFAPLYLANGKDPADGSQVLFKNLTYVWRPIPKSPFIVVGVFP IEDYVQNK AQN  
VYWQSFDEPANYHNLDNESIANGINICLLNTIALSPNNSTVKLAPGSFVLP LSYIVYGETERLKLNIQQYLNSNA  
TNNTNTIINSDVKPDVITTAHI IPTWLKNKKYSEENGVI FRYMATESGVFRI FPGVEANMEYDPRLD SWYHRSLK  
SYSKITVSSPFSVNDKAWNDYVTVSKTIYQGRKDHYPGKGEVPGVAGMDVTFGHFRNVLINGAPQCVLSDNDC  
YILDKLGYIIADFNKAAQKKEHISQKFPWLTAYLVSKSSVLEGT YCRDFEHDKAHLFYSLKNFTIINPDVSNPC  
YSFALASVPYGD FLYLLVRPQSARSCNFNSPPPEFESTCSCNSNETCSNCNGITSICQPCSCPLGHDPCTLKTT S  
NASVVCPIYLPYKNTTYNTATRLINTASQCDRACEIAANEELCLIKSSCKWCGNQKVPACSTFCLTNTSSSGSFC  
IFGENPLLLDAFERDKLRTSVVQSLNAFIGNINPKLIWNIRFTTAGQVFYTIILGSDMTPNPGYLTSNISQAINNS  
QVYINYNRKLAHMENICTTGHLKINITFKPQDFSAYNQDTVKIEFLRFIETITR TTFQSRILQRRLESSS FMLA  
VIKSKSKDQIEAEVKS LQQAIRNGISIDLTLHKSLKIHRLYINGNL TET FVPTINVT FQMSRNMSNFSMPERAE  
ISNQVIPLLSELFNASVSNVKNLRIVDEGVTFTLVGGIINDLYSFRDEEIRLEEATKTGQIVLNTTDEAGIIAQ  
KLYINDDFRVKLIVPSMLLNLTFSHMNMDSNDSR LFSERVIVSLEDIILQTS LKNRLKDISMVKSHFGCQLAGQLI  
QKWYPI SQEIEKIRASVNRGLYIQKLDNHAYVVR LFQEFRVIAEYSPFQPLSLHFPRIYFGNFQETRMNAISKK  
LLSIVQKIYNGDSIN FVQDVIYSLDKIKFHLLREVWNEGSIKIYDLSFLSNGVADGKFTHLIDDI PRLNALYSDN  
LMQSQYIPRIPMIMQFPSYITKSLDIYESKEMETDIITQM NKILSDNMINRILKSNLTADGRFD FILRGTGSANL  
PSLQOETNTLAQS IKKLLIQLPQNKTVPVYRYYSNRVLKAEYLNSIGFSFTFTCQNLNGINLTDI SAIQLAIDK  
KLDHVL DNGGTVKPNSTIMWQNIIFNVYENVHFRNWS DIAKQDLIYGVKS KLEIDLPSNNCTIIATKLYSQAEL  
LAIYVPSTPITFALALKVPVMWSNEILFNSIKQAMKTH TGRGLENKLAKFSLSGRNVTFYVNGLHYYNQSFMDTD  
VEAISLSVENKLT LQLSNNSMTYVTEMIQNGTVQAS YMKKSMVLTLPPIYLSLSTGDKSIVS QRLMESLQQT I  
GINTKQRMIGGVTIYNSNITFMLMADIENDAENKKAIEDIKKLVIVGFTIYLPKSNALVRKFYSDDIFQAEHVPR  
SLIRFELPAANLLDYSQLQQNSIKHSILLELQERFLTNSSAKFTNVT LFNNGITFALYEDIDVEKSLFEEVSYIG  
KTVQQGFYLYLELKKIVRRMFVDKAFWSEYLPSELV LLEFLGVAFDNMTASELNQVKTTLFEKVNQTI GLSAIH  
RITETAITDNTISFTLTHEPFNGDSNAPETLHSDIAKLNVKVKS GWYVQLPVYQMTPI SGIYINGNLTEEYIPPT  
TESPLFQTAFPDNATANNQSSLNHVVITFSS LQMNPLIVVISVMVFIILGVGATAVVIMKRREETKYRLLRSS  
ADVAISADDNDDYVTPIEVKRQILESARKLPPPTKVSNS SYSSPY

>evg1344804|Trichoplax\_adhaerens\_vWA

MNRQLKLVWILLWLIHI INCQSLPPRGGLVAQVQKWASEIENDMLTLTEDVLMGQKIQQMFDSSPYEIQIKDGDQ  
IANEVQDTLADYFVKREQVLNDVSKAAVNAYDDFYLNKMGSLLPKQLQNLSDVYFDSIPSRYPEPLTYDTRYF  
QKVNATRGCVKISDQVDRNSKDI IETVAWTSEINKQYIANLKKDNYLKWQYFGSKFGLSYTFPGRPWTTFNFGFT  
KDYDPRLRPWYIAATSGPKDVVIVIDCGLSMQGNRFKIAKSVAKTVLATLTRNDYVNI VCTRF SHWDETGKWHFY  
ETTVLGCYKDQLIPASLTNRKSLSNAI DNLKAGGTSEMKKGFQKAFKLLRGSHTGCQS IMIVITDGEKTDGPKV  
RCSPGYTRSGFVPGPICRYDWEKVVEEIKAQNKITNPKARIFS YLTASKEESFAGEIACSNQGV MVRLDNTEHL  
ISNMQHYYNYLASSSFHNQITWTAPYLDASGLGLTVTLASLVTSGRNENNETLGVAGIDVTLAEIEDLLQRYEWG  
TVYSFLINTDGEAIFHPRLKPSSELVDDPIFVSI DQLEM SHGRPKNFTEVRSEM QEGKSGRAHFSNCIRGIPKGD  
YEDGVDILQVPCYTYRGI TGSTYSFAFNLADSDKQDRYLDNINKSITLPTNF FTALYDYDTIYAKERLPD TYEQ  
LDVQRNNAQYNVPI TVFHSTFTLAPRSYCEPSKYFLEGNSTLITLAHLFANSREVDNKTC LINGANYKRGVRAAI  
QLTSLLERDWKLLKGSVLRQAVKWVYI GLRNGVFRSYPGHIVRKGYDPVKRPWYLRSLTNPTKIAI STAYLDSAG  
LGKVITISKAVQEGIFEISNDTLCNTEQIGNLPAGCPCVTNTDCSSKICYNTSTNSDPRIVQRCGRENVEAVIAM  
DILYSDYYRILNKLKSGEKACEVEYQCPTNPSKICITRCYLIDNVANIVTAKEFLTDSQYDEAQYNRVTL SLKQ  
PEVMSKLVHKFRVFRRENIDYQGTCKISDTSTSRVVFQNVNKS WRGFSDDIPNQGPFPFQNDYGC IQDVI GY  
EAHPENLGQNRMLYDYFSGPCSEGFYFIQLPRTNLFLLVVENYLQHDTYFNINCHIARRVTAAGSFELKNGTCQ  
NSLSFYTKKPICTIRKVLIPCSFNAGHTISSINIYYTLVIATIVSIIHMI

>m.43879|Hoilungia\_hongkongensis\_Alpha2Delta

MRQFYPVLAIVLIIAATGQCQWLTEERV TNWANDLSSRLFYFSNEMIPVENIVQTYKERNITVIPLQVEETAEQF  
RGRLDELLNKVKALKNLVTVAE EIIYRDYKFNESLKP SDVSWYNAK KMRLNDTDPLLCNERFKRSVNL SFSAIQ  
VPTNVYDGGVRVLNAIESSAIDKQFINNSEVDKSITWQYFGSATGFFRLYPAAVWASYDENGNDLYDARKRPWY  
ISSSSTPKDVVILVDVSGSMHGMPLEIAKISIQ TLLRFTGENDFLNVVFFSKEVTLSIPCFKDLVQASESHKYVF  
GRVLASTIKDGGVANFSKA FEYAFEMLQRSKKN SPQHRCHQLIMVFS DGT EERPQTVFDLYNSKKEVNVI TYGMG  
TVTAYLDALRWMACTNKGK FIRIPNVGAI PENIQGYLSILSNPIALTNESIAIWSPVYIDTSGLG LLLTTVSSPVF  
YRPNISSYNQSA DYLLGVMGSDIPLRDVNASVPYNLLGPN SYCFGIDNNGRIFFH PFIDEQLGYLTDPP ELYMRD  
LEI IHGEIWWQNV TAGGKVI EVKVPYNRELQKNMLQGLTGVMYLR TTVHLSSSKRVMMMDRQYHYGPV LNDTFSF  
GTVLPVEGYFSFEPTLTDEEKLEGLAILSNGSQSL LFLQVWRYCSIYDERESDILFVQRPAIEITNISSI IHRIR  
NILFPKKRKDGKGF PDCSKSLASGLIVDAFVFKRLEEYWITISTLASFPQRNYIFRTFIGTSSGLTKIYQGGSFQ  
CGENLYGNCALPDIPNI PRSTIEADYR LASAAINANSFVYLADLDRSSEAIASIEVVRAITITDENATVA VGGY  
QMNSVLLFQMLTETIPECISNNTLACYILDRNGYIVMFAQKNM PFFSHKVQKPIREGAFI GLYEPEIVNSM VDAK  
ILSRVEFITHNQLCRGT KPVNPYTI VSSASKLLT PFRITFNLLLGWLTQLSTTMIHITNI IQDWFSSAEAI CDAP  
QIRNKTIYVCSLLNNLYL FSENIT TNSGVGTCSSCSR PYVITSIPETNLHLLVVDTTQKCD CNPILLQQRQTFFD  
HCQLLQLYRREP DYCTIQFVDKDKSTCN RATATTSINIVI IAVAILFQQMMG

>m.36157|Hoilungia\_hongkongensis\_Alpha2Delta

MSIEMAVQGSKFWMALVAIFIMISFHQSSINGQLFNLENTNLWADQIGNEIYKFAYETLDLEQIENTYQRQDIIV  
EDLNGSLVVQELSKNLRSTFLTKVSALQKLVNAVQLLANDKLDNETELRQLHYDSTSENI TEELNMVYSPIYKT  
MVNTSISVIQIPKNVYSGNETVLQTI EYTRNLNKYFVENYN NDSNLRNQYFGGTYAVFRTFPGRPWP KDKSGIVL  
YDCRQRGWYILGSDSPKNIVIMLDRSGSMRGMPLTIAKWGVS NLLD TLNQNDFFTILTFNESTTPVIDCY PDLIQ  
ATDNNKQLYKDYLEKFEDGGRADFNQSYATAFEMLHNARTQSYRHS AKCQEAIVLFTDGAAQYVDK LIAEKNKDK  
KIRLITFIVGPQFYDTNEIQKLANKYNGFLAKVPSIGQVRDVIRQYTEVMNKPLLND DVHPAKWTSVYWDKLG LG  
LVTTVVLP AFQFNASAGPLPEKLLGV MATDVPIEFQQCVPQHLLSPNGYAFVIDNNGLVLFHPGITASNGYLEN  
PPPIDI IHLEHGS RTEELRQAMIDRLTGSISMETEILHQNVNQGRGI IKKMTYHYTPITNTSYVAIAIEDTTGL  
PNTTSCHSLGIEYLNMTQNSIATTILNWLHCQGDDFHLSSKYDPKMSRNCYHEITSGQIKDSTDFDKLCNKALF  
KQLLHDAYCVSKLKVPHQALQDDTLANQEGICDTFISTFSGITKYT LISGQRCCNILGSSQCMQKSGS GFEIRNT  
SVQSPLYERVVSELSVNQSHFTFRLQHRIGAHYSILITKPINIGKSNKFLRAVGMEMAFQRFRSIITSVPL LNE  
NPALNCFNISNKS K VATCFILDENAFILD TNLDSTEVGKPLSIVDGNLLGSLILNNVYIRETIWDYQGVCSNSQT  
SSSARKIMNPFISVYNYFSVFTTSLFSFLAHFNLA SMISYLG SFLHGRVAEGSYTDIRPDNKSCIYIRQFILLGE

NASSRVTGNTICDS DGNTRTFYMSPINNTNLRLVVVDES KSDVCQNDTITFTPATVASIEQIKNQTC AENGNRYRIGPEICFKKFVDDGTGQYNSALS CYSQNFILRFCLVMIALNFLMI

>m.11565|Hoilungia\_hongkongensis\_CACHD1

MAARIYYGIKRNTIRALWILIIIAIAAPSYSYKLD SNIKWATILGOEMKVFTEKTLAPSKIQQLYDNVDYRQYL ASPQAIIDDL SQDLNATLSDI IQFIRSAKGMIESSYTSRKF LSSAHYQSCCNSIDL SYNME LNDEVNLSTPCII FPAQNTHSYIPKALESAYHRNFVDNLSVKWQY YAGSNNIFYQYPTSKRYCNTNYPTQT KFKQWYVNAASPTPKRLV LVLDRSGSMSGDRFTKVKEAATAVLD SLGPNDEIGVIAFDDEIRIHGGCKVTTVSPATPQSILFLKDFIKTKIEP EFGSTGYVPALRYAFDMLATNRTLQAKSKTNLIVFLTDGHPDEDESQILDIKNRNDALNNSVLILTYGFGSLNK DGRSILTKMATQNHDS SWGNSIKYPKPYGPNGTMTYLLDYSGHRLRNQMGTYYMNL RDFS TDIQYTVPPYDITLG SGLFFTMSVACYHGNQLIGVVANDISLLELFQQLPYFDHGKYSYAFLIDNQGRLLIHPKQAYASKTNPMP SILNL ETMEPEFVQKAGLNTILQGGGGEISVIASLYIPNSKNPADGSQVLVKNVTYSWRPVPKSPFIVVGAFFPEEDYIHY KPINIYWKSHDNSALHYHILDNETNANGPNICFQNSIILSPNTSTIKLAPGSFLLPLSYIVHGETEKLRLTIQQY LSSNASNTSNTDINGDVKPDVIT TARI VPTWLRSKQHTHEHNGVIFRYMATESGVFRIFFGVEANIEYDPRVEGWY QOSIKSYSKISVSPFFSDIDKLWKGYVTVSKVIYQGRKDYKHPGVGEIPVGVAGMDVTYSQFRTVLVTGAPQCIY SDYDCYIILDKAGYIIADFN SKMMQKKEHISQKFPWLS SYLIAKASILKGTFCQDFEHDKIHLFYAMKNFTIVNPN VSNQCYSFAFTSVPHTDFYLLARPKAARQCNYNSPPPPFDS PCTCNTNTSCSVCNNISAKQCPCSCPLGHDPCT LRTKSNTAVICPVYLPYKNATFNTV SRLINVANQC DRACETAANEELCLMKSSCKWCSNQLI PVCSTFCLTNASS SGSFCIFGKNPLALDGFGRDALRTSIISSIRSEIGDINPKLIWNIQFTAAGQVFFTTILGSDLT SNPEQLANNIAH TINDSQFYVGYKKFALPEYICTTGHLKINITFDRQNFPI SYQATIKNEFLRFIESITGTQLQPRILQMLLKDTS FMVAVIKSKNSSLTQTEVTSLEHAVHNGISVNLPTLQKSLQIHQLYINGNLTERFIPTINITFQMSRNMSNF SVL ERAEILQQVVPLLEL FNISTASNIKDLQMTDEDITFNMFGGVVNNRYSFRDEEILLETATKTGQLVFNTTDQSG IIVQKLFINDEFRCNLIIPVVNLNFTFSYMKMDINTSKLFAQRVVITIGDIIQTNIESRVRDVSLIKTQFGCQLV GRTIQKWYPI SKEIEKLQVSVNGGLYIQKLD SHYAYVARLYREFRVIAEYSPFQALSMRYPRIHFGTFPETRLNT ISKLLHIVQGIYNGDSVNFVQDVVYSLDKVKFHLLREVWNEGSIKVYDLTFLSKAVSEGKFTHLIDKTQRLYSL YSDNLMQAQYIPRI PMTLQFPSYIVESL DLDESNDMETDII TQIDTILSNLANRILKHNLTSEGRFNFI LRGTG SASLPSLRQETNILALNVSSKLLIPLPNKSVPVYRYSNELLQAEYLASVNF SFSFTKQNTCKIYLTDSNTLSW AIDKKNLQILDNGGTVTQNTFVSQNRVLFVSEN VNFQNWTEIAKQDLIYGVSKLQIDIPSSNCSLIATKLYS KSNLLAIYVPSVPITFALAIKVPVMWSNHVIFHGIQQAMTTQVGRGLENKLIYSSISRRNITFYVNGLHYNQTY IDMDVAAIVQGVKNKLVLRLSNNSVSYVTEMVQNNMVQAS YVEKSVMAFTLPTIYLSL SNQEKIIVGERLMGTL QQTAGINTNQRI SGFIIYKENMTFVLAADIQNDPENKKA IKDIQKIIIVGLTIYLPKSNALVRKFYSDNVFQAEH VPKSLIRFELPTANLLSYTKSQQTSIKHSILVQLQDSFLVGNTSAKITNITLQNN SITFSLYEDIAVEKSLFEEV SLIGNSVRKGFYLTYLESSKIVRRMFVDKAFWAEYLQSESI LLEFLDVTFDNMTAKQLHQVNVTLFEQVNQTIGL SAFRRITDITFTGNAISFTLTHEPYDGN SNVPETLDTDI AKLNNKVKNGWYWQISLQQVAPVTGIFVNGNLTEDY QPPTTEPPEFDTFSPDNTTFANQSSINSHIVITFSSVHMNPV IIVVISVMVFIIIFGAGATAVVVLRREETKYRL LQTNADVAISADDNDYVTPLEVKRQMFERARKLPVPPTGNSRSSYSATY

>m.66151|Hoilungia\_hongkongensis\_vWA

MVSQRLKLGWIVLWLVPMMACQSLPPRGGLVAQVQKWATEIEDDMLTLTEEILFTQKVQQLF DSSPYKIQFKNGN QVADEVQDTLADYFVKREQALNDVTKAAVNAYDNFY LKNLGSSQLQNLSSDIYFDS DIPSRYPEPFIYDTRY FQKVVNTRACAKISDQVDRNSKDI IETVAWTSGINAQYVTNLKKNY LKWQYFGSKFGLSFTFPGRPWTTNFVGF TKDYDPRLRPWYIAATS GPKDVVIDCSLSMQGNRFKIAKAVAKTVLATLTRNDYVNIVCARF SHWDETGWKWHY YETTVLGCYKDQLIPASLPNRKSLTNAIDNLKAGGTSEMKRGFQKAFKLLRGS HR TGCSIMIVI SDGEKSDGPK VRCSPGYTRSGFVPGPICRYDWEKVVEEITAQNKITNPKARIFSYLTASKEESFTGKIACDNQGIMVKLDNTEN LISNMQHYYNYLASSSFHTQITWTAPYLDASGLGLTVTLASLVTSGRDESNETLGVAGIDVTLAEIEDLLQRYEW GTAYSFLINNDGEAIFHPRLKPSSELVDDPIFVSI DQLEM SHGRPENFTKLRSEM QKGS GSMQFLNCIRGIPKG DFEDGVDILQVPCTYYYRGITGSTYSFAFN LADSKEDRYLSNLNGSIALPTSFFTAMFDYDTLYGRERIPGGYN RLDIRHNDPVYNVPVSFVHSIFTLAPRSYCEPSKYFLEGNSTLITVSAHVYANSREMDNRSCLSGGKFKDGIRAT IQLTSLENDWKEKLDATRQTVKVVYIGVRNGVFRSYPGHI VHKGYPVKRPWYLRSLTNPNEIAISTAYLDSA

GIGKVITISKAIKDGIFEISNSSLCGIEVIGNLPAGCPCNANSDCASKSCYNTSTSSDTRVMQRCGRENVEAVVA  
MDILYKDYNNRIQNKLHSGQKACEVEYQCPTNPSKICVTRCYLVDNVANIVTAKEFLSDSQYDEVQYNRVTLSEFK  
QPEVMGKLVHXYRIFQRRENIDFQGTCKISDATSSRVVFRQSVNKSWRGFSDDIANQGPFPFQNDYGCIQDVVG  
YEAHPENLQGNRMVYDYFTGPCSEGGFFYFIQLPRTNLFLLVVENYLRHDTYFNINCHISRRTAAGSFELKNGTC  
QNALSFYTKKPICTIRKVLIPCSFNTANTVSVINAHMLVIATILAFIHVK

>XP\_004998635.1|Salpingoeca\_rosetta\_Alpha2Delta/CACHD1

MRAVAAAGLALCTATVVLMAVDVHGQTLLNLLQAREQEVEQLATALRGLYDDAYCGSASCASDVAAACESELLT  
STCASTFGGCRSKTENRRDLDFSSVMRTASTPFDDVDRQEQACWTRQLDNTFISINGGTSENTDTATKWQYVGTSS  
GFYRIYPGVPQQDCNAYDPRLRPWYVAATSGPKDIVIVLDRSGSMATNNRWETAMDAEETVLETTLTIADFVAIVV  
FDTASQVCGTTIPCGSLVQATADNVGTLRLLANFNPDGSTNFESAFQVAFSVLKQTGERTSNCHTAILEFMTDG  
MITAGLEGNAFLDFVDDEQDALEAAVGKRAVLFTFSFGTGADETI PKALACNHNGTWSPEYNINLRQQMGNYD  
YFASLRATTSSPVVWVEPYEDASGAGVLTTASKAVYDTRFSPARLIGVIGIDILASDLQDVAVDYEDLLDALVQR  
SNTCPTITLDRCELGAIRTTDYSTSGFPSQYTENDRLCDADELDCSTTNLPCVDDNNIYTPPSIPATEETHSH  
FGNSRSSYTDEACRSCSKSVSSGAEHTRVSAVVVAALIALSMLAF

>XP\_004993504.1|Salpingoeca\_rosetta\_vWA

MQQLMSVALVLVAFVAHAPVITAQQCPFFPDGRQPQRQPTLGNCTHYIESACCTRAEVSSVFAELPRLKAPKNKK  
DPSECYAEMNNLLCYFCSPAQSDFYREGVPPVCERMENRVYRCKRFSVNGVKMEDAYSSGTFKCEAQGFIVDST  
PLADVPRGVPVYSTCHIYLDAAASAVHPSIMLLAAVLLVSI GNACGLGSSSESNDKAAESKRTRQGT PKYTPA  
PTRAPTRSLPSAASTARASASINTT SIMRASVAVAVLALAVLCSVPSATAQTDTVDDADMVAWAAGVAQQLHTMR  
SQGTAANHLQNTIDTANYTKETIDAGARARMVADRLSDFTRKEALARNLAAAAADAYMRHKQNPVILEQYANVD  
LPESLPDLTFSPFYKTNVSFAQSGTKVAIDEPQPSQAVDS DIAWTAGLDGDGVFTRNMQNDSDIRWQYVGTERTGV  
FRQFPARLWDTNFIGFPLDFDPRFRPWYLATLSGPKDIVIVLDCSRSMRGDKWINDAVAMTKFLVNSLSRDDRNV  
VCFSSSHKDYNDNFVYRRETEVLSCRKHELLRGTSSNKEDTFTRLDGYTPAGGTDPLTGIQVGFRLLRGECNGLDT  
DCPMRDPPTDCQRLMVFLSDGKDRDNEVRCGRGRYYYTRNGRQYDPPPLCQFKWDDTFDYVRNNAGDIRIFSFG  
LSTRNPVSSPRDDELPGTVACSAKGTYYVYSDRGLYQTMGDYFDYITRSTDIAGLAWSAPYIDALGLGLLMT  
VSPVLDPDTNDVVAVAGIDVSLETIEDLLMEEQWGEVYGFVDDTGDTVLHPQLRPAADLRDDPVFPDI RELEQ  
TYDLQQRFPVPEFDPVRELFKKNKGSVFPNAQRVIPQDRQAGVNIYTEPTYYVQPIPDSELLFGFAVPLK  
DVEFEFPGIPPVSREYYQHMRLYDQTYRTQLADRGLIITTSDTTNITAPSHYAAKYQQLSVEFTGNDPVYPSLY  
ISREHATFKLAAESYCDSVKYINHINDPEYFDNTELFIHITTDNNTVFEDCPAGFFEMGVVADVRLVQGIEDEWK  
GAPSDVIWSYVGTGGVSLFLPGHRLPHRYDPRTRPWYHQAYS LQNRVPTIVTSPYLDVSGSGKIITTIATTVFQ  
SKANITQKACTTYLDCEVDGDCRLSCYNVDGPCLGSGVCTCSADSIHSVAVDVTYETFHQIVEDAVPACTQS  
STTRCFVIDSGLLVYDAE IADALDGSTRSYERISVARRDGSVMRHLVAEGLTRDDYVDYQGECSSTRPFDRLS  
VKGLREGLPPRDADVYDKFRGPQRHDFLYTCVNDVIAYTAVRDALPVGTVSSGSTQANPCLQSQDMKITPI PNT  
NLVYLVVAYNRREESTPMPFNCHIFNRAVDSGAFQIVNGTCAAAMTEEEPTLREQEMCPALYPTLECSFNAAST  
TPPLVLFSSLLVAVLFLCN

## References

32. Tikhonov, D. B., and Zhorov, B. S. (2011) Possible roles of exceptionally conserved residues around the selectivity filters of sodium and calcium channels. *Journal of Biological Chemistry* **286**, 2998-3006
38. Chen, Y.-h., Li, M.-h., Zhang, Y., He, L.-l., Yamada, Y., Fitzmaurice, A., Shen, Y., Zhang, H., Tong, L., and Yang, J. (2004) Structural basis of the  $\alpha_1$ - $\beta$  subunit interaction of voltage-gated  $\text{Ca}^{2+}$  channels. *Nature* **429**, 675-680
106. Hering, S., Zangerl-Plessl, E.-M., Beyl, S., Hohaus, A., Andranovits, S., and Timin, E. (2018) Calcium channel gating. *Pflügers Archiv-European Journal of Physiology* **470**, 1291-1309
108. Liao, P., Yu, D., Li, G., Yong, T. F., Soon, J. L., Chua, Y. L., and Soong, T. W. (2007) A smooth muscle  $\text{Ca}_v1.2$  calcium channel splice variant underlies hyperpolarized window current and enhanced state-dependent inhibition by nifedipine. *Journal of Biological Chemistry* **282**, 35133-35142
109. Tuluc, P., Molenda, N., Schlick, B., Obermair, G. J., Flucher, B. E., and Jurkat-Rott, K. (2009) A  $\text{Ca}_v1.1$   $\text{Ca}^{2+}$  channel splice variant with high conductance and voltage-sensitivity alters EC coupling in developing skeletal muscle. *Biophysical journal* **96**, 35-44
110. Hofer, N. T., Pinggera, A., Nikonishyna, Y. V., Tuluc, P., Fritz, E. M., Obermair, G. J., and Striessnig, J. (2021) Stabilization of negative activation voltages of  $\text{Ca}_v1.3$  L-Type  $\text{Ca}^{2+}$ -channels by alternative splicing. *Channels* **15**, 38-52
